# Supplementary material for: Differential circulating miRNA profiles identified miR-423-5p, miR-93-5p, and miR-4532 as potential biomarkers for cholangiocarcinoma diagnosis
Source: PeerJ journal article supplement (doi:10.7717/peerj.18367), 2024-12-10
Supplement: Sup4_Reactome_of_CCAvsOV_up.pdf [file Sup4_Reactome_of_CCAvsOV_up.pdf]

# Pathway Analysis Report

This report contains the pathway analysis results for the submitted sample ". Analysis was performed against Reactome version 87 on 15/03/2024. The web link to these results is:

<https://reactome.org/PathwayBrowser/#/ANALYSIS=MjAyNDZMTQwNjM0MTJfMTU2OTY%3D>

Please keep in mind that analysis results are temporarily stored on our server. The storage period depends on usage of the service but is at least 7 days. As a result, please note that this URL is only valid for a limited time period and it might have expired.

## Table of Contents

1. [Introduction](#)
2. [Properties](#)
3. [Genome-wide overview](#)
4. [Most significant pathways](#)
5. [Pathways details](#)
6. [Identifiers found](#)
7. [Identifiers not found](#)

# 1. Introduction

Reactome is a curated database of pathways and reactions in human biology. Reactions can be considered as pathway 'steps'. Reactome defines a 'reaction' as any event in biology that changes the state of a biological molecule. Binding, activation, translocation, degradation and classical biochemical events involving a catalyst are all reactions. Information in the database is authored by expert biologists, entered and maintained by Reactome's team of curators and editorial staff. Reactome content frequently cross-references other resources e.g. NCBI, Ensembl, UniProt, KEGG (Gene and Compound), ChEBI, PubMed and GO. Orthologous reactions inferred from annotation for Homo sapiens are available for 14 non-human species including mouse, rat, chicken, puffer fish, worm, fly and yeast. Pathways are represented by simple diagrams following an SBGN-like format.

Reactome's annotated data describe reactions possible if all annotated proteins and small molecules were present and active simultaneously in a cell. By overlaying an experimental dataset on these annotations, a user can perform a pathway over-representation analysis. By overlaying quantitative expression data or time series, a user can visualize the extent of change in affected pathways and its progression. A binomial test is used to calculate the probability shown for each result, and the p-values are corrected for the multiple testing (Benjamini-Hochberg procedure) that arises from evaluating the submitted list of identifiers against every pathway.

To learn more about our Pathway Analysis, please have a look at our relevant publications:

Fabregat A, Sidiropoulos K, Garapati P, Gillespie M, Hausmann K, Haw R, ... D'Eustachio P (2016). The reactome pathway knowledgebase. *Nucleic Acids Research*, 44(D1), D481–D487. <https://doi.org/10.1093/nar/gkv1351>. 

Fabregat A, Sidiropoulos K, Viteri G, Forner O, Marin-Garcia P, Arnau V, ... Hermjakob H (2017). Reactome pathway analysis: a high-performance in-memory approach. *BMC Bioinformatics*, 18. 

## 2. Properties

- This is an **overrepresentation** analysis: A statistical (hypergeometric distribution) test that determines whether certain Reactome pathways are over-represented (enriched) in the submitted data. It answers the question 'Does my list contain more proteins for pathway X than would be expected by chance?' This test produces a probability score, which is corrected for false discovery rate using the Benjamani-Hochberg method. [↗](#)
- 65 out of 83 identifiers in the sample were found in Reactome, where 1091 pathways were hit by at least one of them.
- All non-human identifiers have been converted to their human equivalent. [↗](#)
- IntAct interactors were included to increase the analysis background. This greatly increases the size of Reactome pathways, which maximises the chances of matching your submitted identifiers to the expanded pathway, but will include interactors that have not undergone manual curation by Reactome and may include interactors that have no biological significance, or unexplained relevance.
- This report is filtered to show only results for species 'Homo sapiens' and resource 'all resources'.
- The unique ID for this analysis (token) is MjAyNDZMTQwNjM0MTJfMTU2OTY%3D. This ID is valid for at least 7 days in Reactome's server. Use it to access Reactome services with your data.

### 3. Genome-wide overview

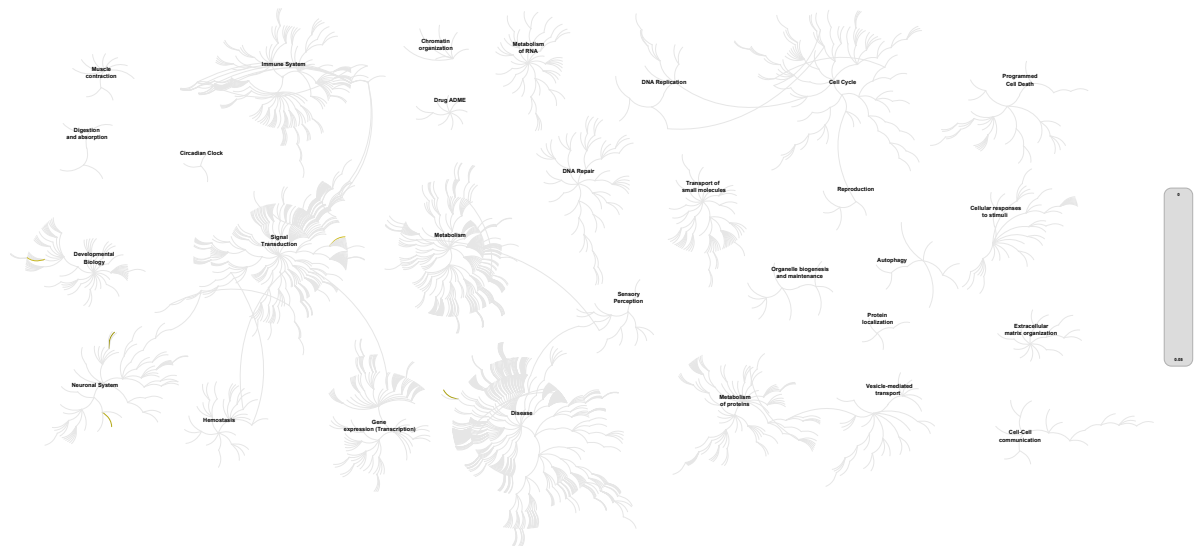

This figure shows a genome-wide overview of the results of your pathway analysis. Reactome pathways are arranged in a hierarchy. The center of each of the circular "bursts" is the root of one top-level pathway, for example "DNA Repair". Each step away from the center represents the next level lower in the pathway hierarchy. The color code denotes over-representation of that pathway in your input dataset. Light grey signifies pathways which are not significantly over-represented.

## 4. Most significant pathways

The following table shows the 25 most relevant pathways sorted by p-value.

| Pathway name                                                                 | Entities |          |         |       | Reactions |          |
|------------------------------------------------------------------------------|----------|----------|---------|-------|-----------|----------|
|                                                                              | found    | ratio    | p-value | FDR*  | found     | ratio    |
| RHO GTPases Activate Formins                                                 | 5 / 203  | 0.009    | 0.019   | 0.754 | 10 / 27   | 0.002    |
| Sema4D in semaphorin signaling                                               | 2 / 31   | 0.001    | 0.023   | 0.754 | 5 / 13    | 8.83e-04 |
| Receptor-type tyrosine-protein phosphatases                                  | 2 / 37   | 0.002    | 0.032   | 0.754 | 2 / 6     | 4.08e-04 |
| Defective Inhibition of DNA Recombination at Telomere Due to DAXX Mutations  | 1 / 5    | 2.18e-04 | 0.037   | 0.754 | 1 / 1     | 6.79e-05 |
| GABA synthesis                                                               | 1 / 6    | 2.62e-04 | 0.044   | 0.754 | 2 / 2     | 1.36e-04 |
| G1/S-Specific Transcription                                                  | 4 / 184  | 0.008    | 0.051   | 0.754 | 3 / 28    | 0.002    |
| Signaling by membrane-tethered fusions of PDGFRA or PDGFRB                   | 1 / 7    | 3.06e-04 | 0.051   | 0.754 | 2 / 2     | 1.36e-04 |
| MECP2 regulates transcription of genes involved in GABA signaling            | 2 / 51   | 0.002    | 0.057   | 0.754 | 2 / 4     | 2.72e-04 |
| PP2A-mediated dephosphorylation of key metabolic factors                     | 1 / 9    | 3.93e-04 | 0.065   | 0.754 | 4 / 4     | 2.72e-04 |
| Defective CHST3 causes SEDCJD                                                | 1 / 9    | 3.93e-04 | 0.065   | 0.754 | 1 / 1     | 6.79e-05 |
| Defective CHST14 causes EDS, musculocontractural type                        | 1 / 9    | 3.93e-04 | 0.065   | 0.754 | 1 / 1     | 6.79e-05 |
| Defective CHSY1 causes TPBS                                                  | 1 / 10   | 4.37e-04 | 0.072   | 0.754 | 2 / 2     | 1.36e-04 |
| Synthesis of IPs in the ER lumen                                             | 1 / 10   | 4.37e-04 | 0.072   | 0.754 | 3 / 3     | 2.04e-04 |
| N-glycan antennae elongation in the medial/trans-Golgi                       | 2 / 59   | 0.003    | 0.073   | 0.754 | 2 / 14    | 9.51e-04 |
| Opsins                                                                       | 1 / 11   | 4.80e-04 | 0.079   | 0.754 | 1 / 2     | 1.36e-04 |
| RHO GTPases activate KTN1                                                    | 1 / 12   | 5.24e-04 | 0.086   | 0.754 | 2 / 2     | 1.36e-04 |
| NTRK2 activates RAC1                                                         | 1 / 12   | 5.24e-04 | 0.086   | 0.754 | 1 / 2     | 1.36e-04 |
| Regulation of signaling by NODAL                                             | 1 / 12   | 5.24e-04 | 0.086   | 0.754 | 1 / 3     | 2.04e-04 |
| Inactivation of CDC42 and RAC1                                               | 1 / 12   | 5.24e-04 | 0.086   | 0.754 | 1 / 4     | 2.72e-04 |
| Dermatan sulfate biosynthesis                                                | 1 / 13   | 5.68e-04 | 0.093   | 0.754 | 4 / 4     | 2.72e-04 |
| Vitamin B1 (thiamin) metabolism                                              | 1 / 14   | 6.11e-04 | 0.1     | 0.754 | 1 / 5     | 3.40e-04 |
| Signaling by GSK3beta mutants                                                | 1 / 15   | 6.55e-04 | 0.107   | 0.754 | 1 / 1     | 6.79e-05 |
| ERKs are inactivated                                                         | 1 / 15   | 6.55e-04 | 0.107   | 0.754 | 1 / 2     | 1.36e-04 |
| Abasic sugar-phosphate removal via the single-nucleotide replacement pathway | 1 / 15   | 6.55e-04 | 0.107   | 0.754 | 1 / 2     | 1.36e-04 |
| MASTL Facilitates Mitotic Progression                                        | 1 / 15   | 6.55e-04 | 0.107   | 0.754 | 1 / 4     | 2.72e-04 |

\* False Discovery Rate

## 5. Pathways details

For every pathway of the most significant pathways, we present its diagram, as well as a short summary, its bibliography and the list of inputs found in it.

### 1. RHO GTPases Activate Formins (R-HSA-5663220)

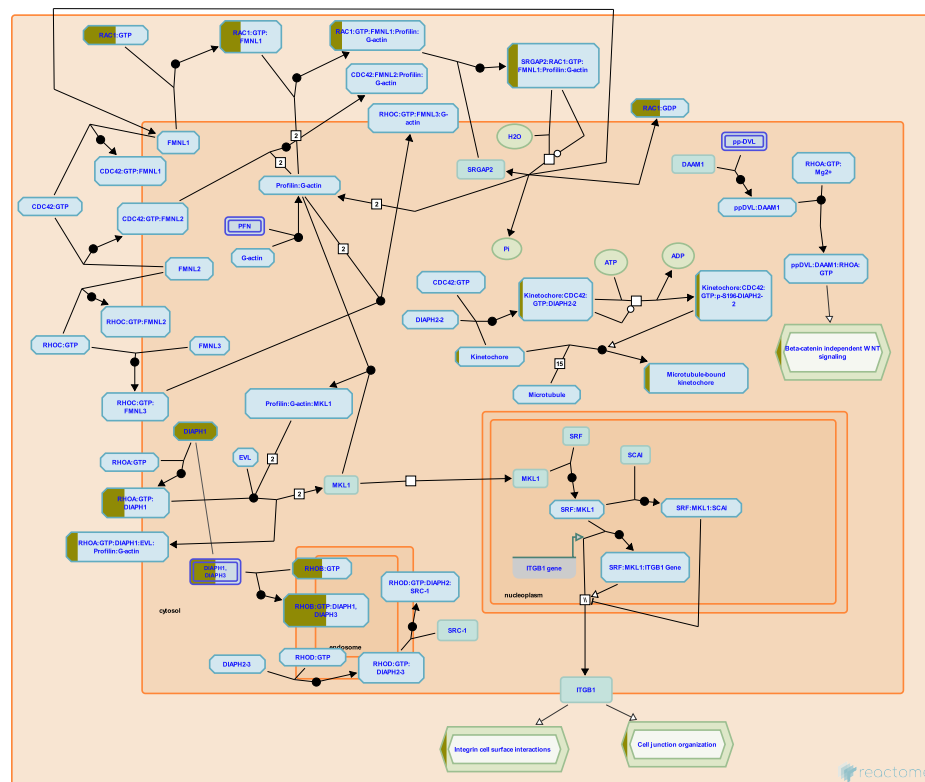

**Cellular compartments:** cytosol, nucleoplasm, plasma membrane, endosome membrane.

Formins are a family of proteins with 15 members in mammals, organized into 8 subfamilies. Formins are involved in the regulation of actin cytoskeleton. Many but not all formin family members are activated by RHO GTPases. Formins that serve as effectors of RHO GTPases belong to different formin subfamilies but they all share a structural similarity to *Drosophila* protein diaphanous and are hence named diaphanous-related formins (DRFs).

DRFs activated by RHO GTPases contain a GTPase binding domain (GBD) at their N-terminus, followed by formin homology domains 3, 1, and 2 (FH3, FH1, FH2) and a diaphanous autoregulatory domain (DAD) at the C-terminus. Most DRFs contain a dimerization domain (DD) and a coiled-coil region (CC) in between FH3 and FH1 domains (reviewed by Kuhn and Geyer 2014). RHO GTPase-activated DRFs are autoinhibited through the interaction between FH3 and DAD which is disrupted upon binding to an active RHO GTPase (Li and Higgs 2003, Lammers et al. 2005, Nezami et al. 2006). Since formins dimerize, it is not clear whether the FH3-DAD interaction is intra- or intermolecular. FH2 domain is responsible for binding to the F-actin and contributes to the formation of head-to-tail formin dimers (Xu et al. 2004). The proline-rich FH1 domain interacts with the actin-binding proteins profilins, thereby facilitating actin recruitment to formins and accelerating actin polymerization (Romero et al. 2004, Kovar et al. 2006).



Different formins are activated by different RHO GTPases in different cell contexts. FMNL1 (formin-like protein 1) is activated by binding to the RAC1:GTP and is involved in the formation of lamellipodia in macrophages (Yayoshi-Yamamoto et al. 2000) and is involved in the regulation of the Golgi complex structure (Colon-Franco et al. 2011). Activation of FMNL1 by CDC42:GTP contributes to the formation of the phagocytic cup (Seth et al. 2006). Activation of FMNL2 (formin-like protein 2) and FMNL3 (formin-like protein 3) by RHOC:GTP is involved in cancer cell motility and invasiveness (Kitzing et al. 2010, Vega et al. 2011). DIAPH1, activated by RHOA:GTP, promotes elongation of actin filaments and activation of SRF-mediated transcription which is inhibited by unpolymerized actin (Miralles et al. 2003). RHOF-mediated activation of DIAPH1 is implicated in formation of stress fibers (Fan et al. 2010). Activation of DIAPH1 and DIAPH3 by RHOB:GTP leads to actin coat formation around endosomes and regulates endosome motility and trafficking (Fernandez-Borja et al. 2005, Wallar et al. 2007). Endosome trafficking is also regulated by DIAPH2 transcription isoform 3 (DIAPH2-3) which, upon activation by RHOD:GTP, recruits SRC kinase to endosomes (Tomimaga et al. 2000, Gasman et al. 2003). DIAPH2 transcription isoform 2 (DIAPH2-2) is involved in mitosis where, upon being activated by CDC42:GTP, it facilitates the capture of astral microtubules by kinetochores (Yasuda et al. 2004, Cheng et al. 2011). DIAPH2 is implicated in ovarian maintenance and premature ovarian failure (Bione et al. 1998). DAAM1, activated by RHOA:GTP, is involved in linking WNT signaling to cytoskeleton reorganization (Habas et al. 2001).

## References

- Carlier MF, Egile C, Didry D, Romero S, Pantaloni D & Le Clainche C (2004). Formin is a processive motor that requires profilin to accelerate actin assembly and associated ATP hydrolysis. *Cell*, 119, 419-29. [↗](#)
- Banfi S, Philippe C, Arrigo G, Borsani G, Ballabio A, Manzini C, ... Zuccotti M (1998). A human homologue of the *Drosophila melanogaster* diaphanous gene is disrupted in a patient with premature ovarian failure: evidence for conserved function in oogenesis and implications for human sterility. *Am. J. Hum. Genet.*, 62, 533-41. [↗](#)
- Gomez TS, Billadeau DD & Colón-Franco JM (2011). Dynamic remodeling of the actin cytoskeleton by FMNL1? is required for structural maintenance of the Golgi complex. *J. Cell. Sci.*, 124, 3118-26. [↗](#)
- Nezami AG, Poy F & Eck MJ (2006). Structure of the autoinhibitory switch in formin mDia1. *Structure*, 14, 257-63. [↗](#)
- Wallar BJ, Alberts AS, Deward AD & Resau JH (2007). RhoB and the mammalian Diaphanous-related formin mDia2 in endosome trafficking. *Exp. Cell Res.*, 313, 560-71. [↗](#)

## Edit history

| Date       | Action   | Author          |
|------------|----------|-----------------|
| 2014-10-24 | Authored | Orlic-Milacic M |
| 2014-12-26 | Authored | Rivero Crespo F |
| 2015-01-17 | Created  | Orlic-Milacic M |
| 2015-02-02 | Edited   | Orlic-Milacic M |
| 2023-11-16 | Modified | Wright A        |

**5 submitted entities found in this pathway, mapping to 5 Reactome entities**

| Input  | UniProt Id | Input | UniProt Id | Input  | UniProt Id |
|--------|------------|-------|------------|--------|------------|
| DIAPH1 | O60610     | MIS12 | Q9H081     | PPP2CB | P62714     |
| RAC1   | P63000     | RHOB  | P62745     |        |            |

## 2. Sema4D in semaphorin signaling ([R-HSA-400685](#))

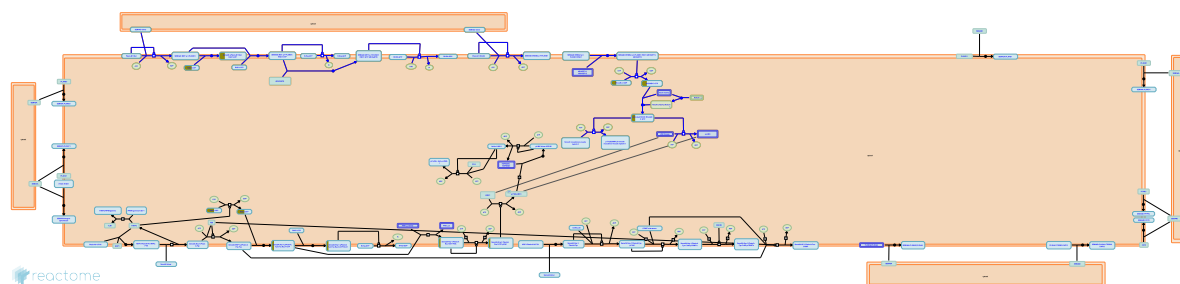

Semaphorin 4D (Sema 4D/CD100) is an axon guidance molecule with two disulfide-linked 150-kDa subunits. SEMA4D is structurally defined by a conserved 500-amino acid extracellular domain with 16 cysteines (sema domain) and also an Ig-like domain C-terminal to the sema domain. Sema4D is expressed on the cell surface as a homodimer; cysteine 679 within the sema domain is required for this dimerization.

The main receptors for Sema4D are plexin-B1 and CD72. The activation of plexins by semaphorins initiates a variety of signaling processes that involve several small GTPases of the Ras and Rho families. Sema4D-Plexin-B1 interaction appears to mediate different and sometimes opposite effects depending on the cellular context. Plexin-B1 activation inhibits integrin-mediated cell attachment and cell migration through the activation of the R-RasGAP activity inherent to plexin-B1 or through the inhibition of RhoA. However, activation of plexin-B1 by Sema4D stimulates the migration of endothelial cells by mediating the activation of RhoA.

## References

- Kumanogoh A & Kikutani H (2004). Biological functions and signaling of a transmembrane semaphorin, CD100/Sema4D. *Cell Mol Life Sci*, 61, 292-300. [↗](#)
- Katoh H, Oinuma I & Negishi M (2005). Plexins: axon guidance and signal transduction. *Cell Mol Life Sci*, 62, 1363-71. [↗](#)
- Guan KL, Aurandt J & Kruger RP (2005). Semaphorins command cells to move. *Nat Rev Mol Cell Biol*, 6, 789-800. [↗](#)

## Edit history

| Date       | Action   | Author                  |
|------------|----------|-------------------------|
| 2009-03-23 | Edited   | Garapati P V            |
| 2009-03-23 | Authored | Garapati P V            |
| 2009-03-24 | Created  | Garapati P V            |
| 2009-09-02 | Reviewed | Kumanogoh A, Kikutani H |
| 2023-11-16 | Modified | Wright A                |

## 2 submitted entities found in this pathway, mapping to 2 Reactome entities

| Input | UniProt Id | Input | UniProt Id |
|-------|------------|-------|------------|
| RAC1  | P63000     | RHOB  | P62745     |

3. Receptor-type tyrosine-protein phosphatases (R-HSA-388844)

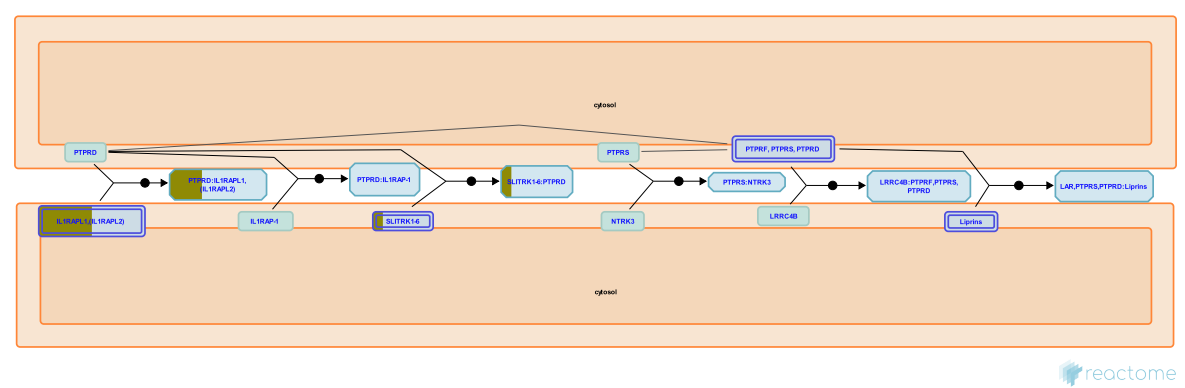

**Cellular compartments:** plasma membrane.

Like neurexins, Receptor-like protein tyrosine phosphatases (RPTPs) make trans-synaptic adhesion complexes with multiple postsynaptic binding partners to regulate synapse organization. The type IIa RPTPs include three members, Receptor-type tyrosine-protein phosphatase F (PTPRF) sometimes referred to as leukocyte common antigen-related (LAR), Receptor-type tyrosine-protein phosphatase sigma (PTPRS) and Receptor-type tyrosine-protein phosphatase delta (PTPRD). These proteins contain typical cell adhesion immunoglobulin-like (Ig) and fibronectin III (FNIII) domains, suggesting the involvement of RPTPs in cell-cell and cell-matrix interactions. To date, six different types of postsynaptic organizers for type-IIa RPTPs have been reported: interleukin-1 receptor accessory protein (IL1RAP, IL-1RacP) (Yoshida et al. 2012), IL-1RacP-like-1 (IL1RAPL1) (Yoshida et al. 2011), Neurotrophin receptor tyrosine kinase 3 (NTRK3, TrkC) (Takahashi et al. 2011), Leucine-rich repeat-containing protein 4B (LRRK4B, Netrin-G ligand-3, NGL-3) (Woo et al. 2009, Kwon et al. 2010), the Slit- and Trk-like (Slitrk) family proteins (Takahashi et al. 2012, Yim et al. 2013, Yamagata et al. 2015) and the liprins (Serra-Pagès et al. 1998, Dunah et al. 2005).

References

Craig AM & Takahashi H (2013). Protein tyrosine phosphatases PTP $\delta$ , PTP $\sigma$ , and LAR: presynaptic hubs for synapse organization. Trends Neurosci., 36, 522-34. [🔗](#)

Edit history

| Date       | Action   | Author       |
|------------|----------|--------------|
| 2008-12-16 | Authored | Garapati P V |
| 2008-12-16 | Created  | Garapati P V |
| 2017-02-02 | Edited   | Jupe S       |
| 2017-02-03 | Reviewed | Ko J         |
| 2023-11-16 | Modified | Wright A     |

2 submitted entities found in this pathway, mapping to 2 Reactome entities

| Input    | UniProt Id | Input   | UniProt Id |
|----------|------------|---------|------------|
| IL1RAPL1 | Q9NZN1     | SLITRK3 | O94933     |

4. Defective Inhibition of DNA Recombination at Telomere Due to DAXX Mutations (R-HSA-9670613)

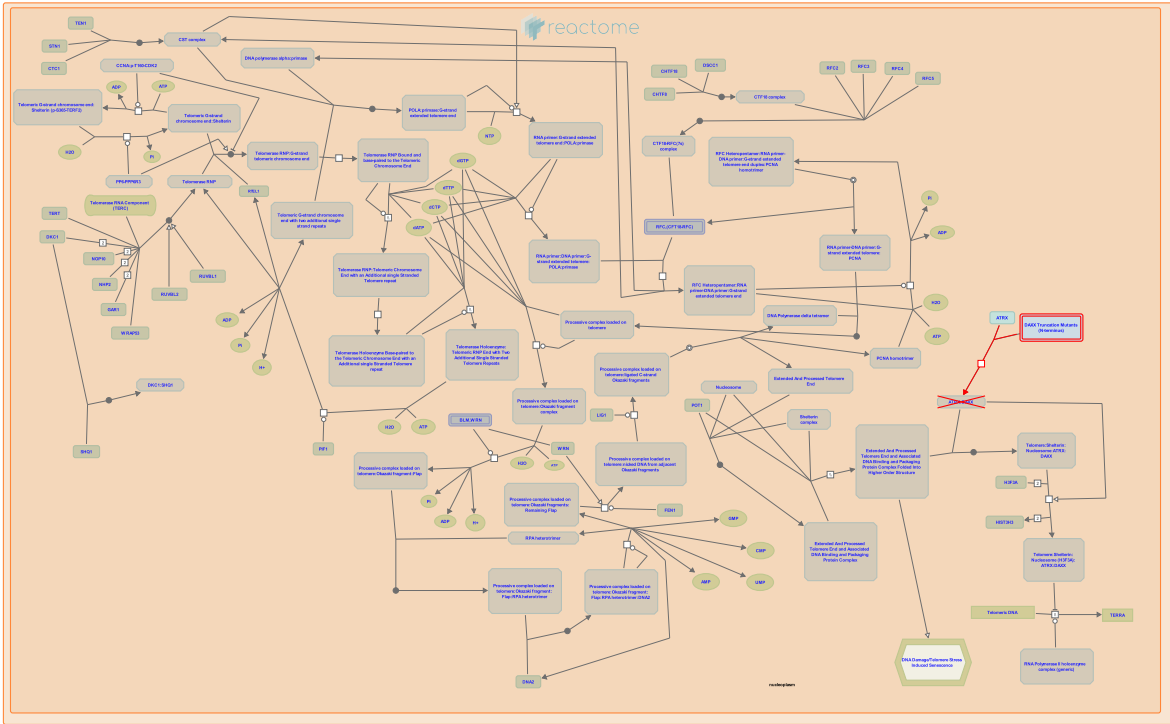

Cellular compartments: nucleoplasm.

Diseases: cancer.

A small portion of tumors that are positive for alternative lengthening of telomeres (ALT) markers and negative for mutations in the ATRX gene harbor loss-of-function mutations in the DAXX gene, which encodes the ATRX binding partner DAXX. For review, please refer to Gocha et al. 2013, and Pickett and Reddel 2015.

References

Groden J, Gocha AR & Harris J (2013). Alternative mechanisms of telomere lengthening: permissive mutations, DNA repair proteins and tumorigenic progression. *Mutat. Res.*, 743, 142-50. [🔗](#)

Reddel RR & Pickett HA (2015). Molecular mechanisms of activity and derepression of alternative lengthening of telomeres. *Nat. Struct. Mol. Biol.*, 22, 875-80. [🔗](#)

Edit history

| Date       | Action   | Author          |
|------------|----------|-----------------|
| 2019-12-11 | Created  | Orlic-Milacic M |
| 2020-04-30 | Authored | Orlic-Milacic M |
| 2020-11-05 | Reviewed | Meeker AK       |
| 2020-11-09 | Edited   | Orlic-Milacic M |
| 2020-11-13 | Reviewed | Reddel RR       |
| 2020-11-16 | Edited   | Orlic-Milacic M |
| 2023-03-08 | Modified | Matthews L      |

### Interactors found in this pathway (1)

| Input | UniProt Id | Interacts with | Input | UniProt Id | Interacts with |
|-------|------------|----------------|-------|------------|----------------|
| EZH2  | Q15910     | P46100         |       |            |                |

## 5. GABA synthesis (R-HSA-888568)

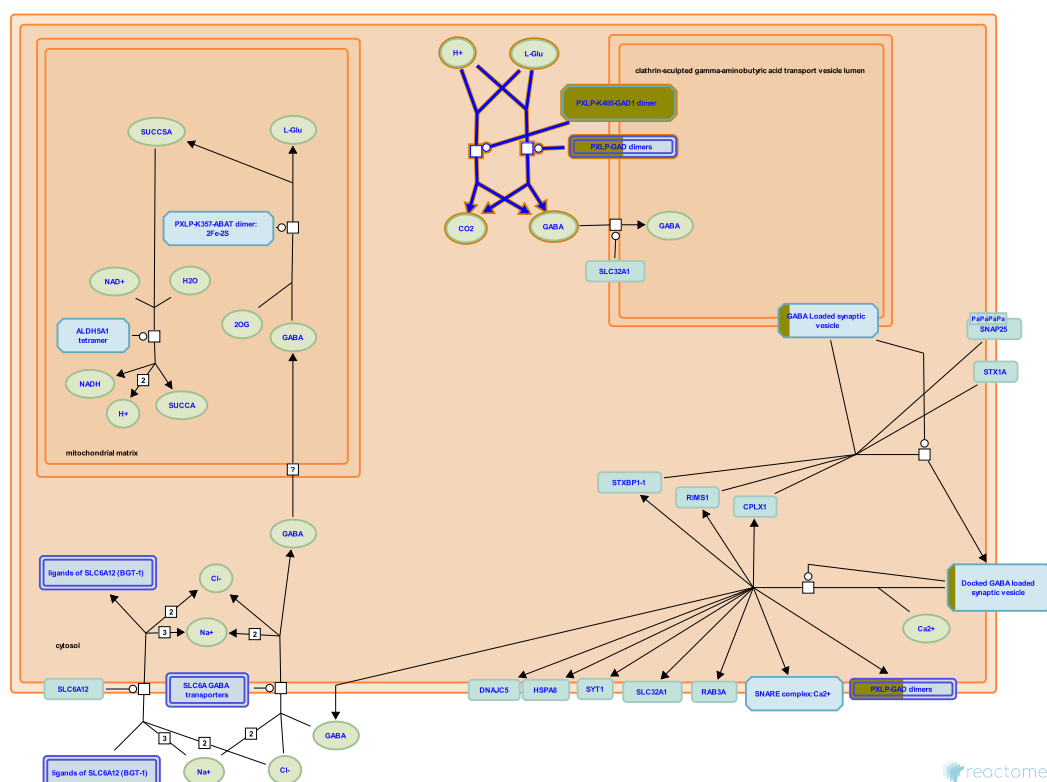

**Cellular compartments:** cytosol, clathrin-sculpted gamma-aminobutyric acid transport vesicle membrane.

GABA synthesized uniquely by two forms of glutamate decarboxylases, GAD65 and GAD67, that are functionally distinct and have different co-factor requirements. GAD65 is functionally linked to VGAT, the GABA transporter and selectively GABA synthesized by GAD65 is preferably loaded into the synaptic vesicles. GABA synthesized by GAD67 may be used for functions other than neurotransmission.

## References

- Petroff OA (2002). GABA and glutamate in the human brain. *Neuroscientist*, 8, 562-73. [↗](#)
- Barke KE & Martin DL (1998). Are GAD65 and GAD67 associated with specific pools of GABA in brain?. *Perspect Dev Neurobiol*, 5, 119-29. [↗](#)
- Soghomonian JJ & Martin DL (1998). Two isoforms of glutamate decarboxylase: why?. *Trends Pharmacol Sci*, 19, 500-5. [↗](#)

## Edit history

| Date       | Action   | Author      |
|------------|----------|-------------|
| 2008-11-27 | Reviewed | Restituto S |
| 2010-06-30 | Edited   | Mahajan SS  |
| 2010-06-30 | Authored | Mahajan SS  |
| 2010-06-30 | Created  | Mahajan SS  |
| 2023-11-16 | Modified | Wright A    |

**1 submitted entities found in this pathway, mapping to 1 Reactome entities**

| Input | UniProt Id |
|-------|------------|
| GAD1  | Q99259     |



## 6. G1/S-Specific Transcription (R-HSA-69205)

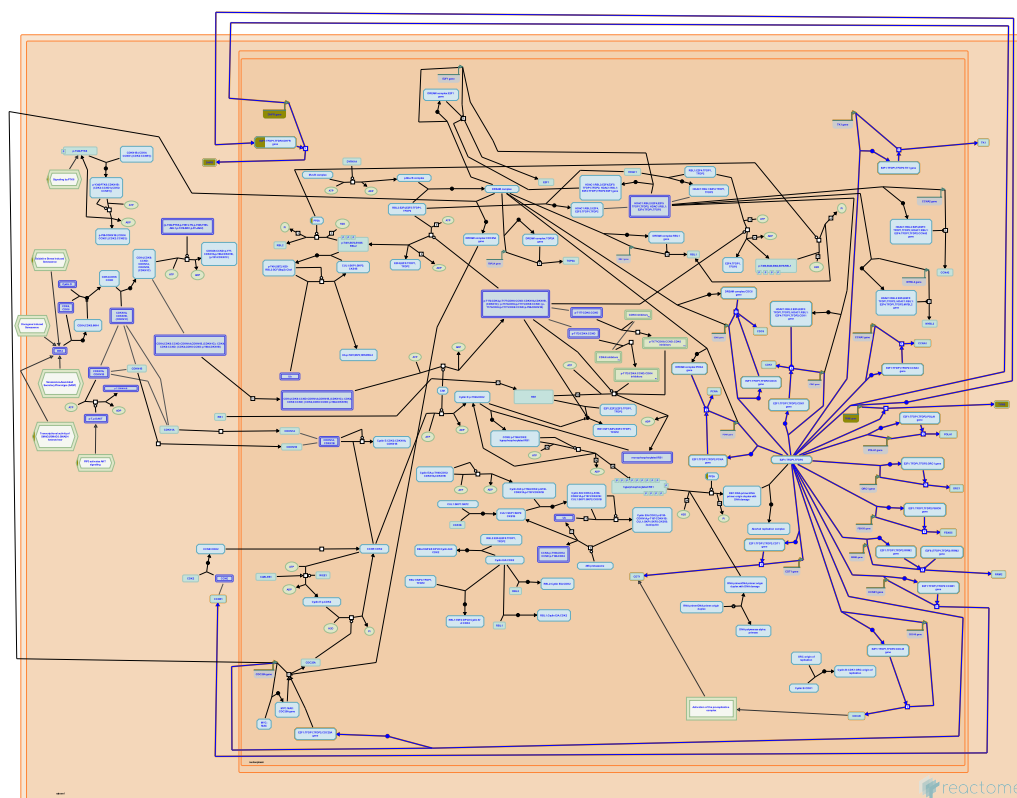

**Cellular compartments:** nucleoplasm.

The E2F family of transcription factors regulate the transition from the G1 to the S phase in the cell cycle. E2F activity is regulated by members of the retinoblastoma protein (pRb) family, resulting in the tight control of the expression of E2F-responsive genes. Phosphorylation of pRb by cyclin D:CDK complexes releases pRb from E2F, inducing E2F-targeted genes such as cyclin E.

E2F1 binds to E2F binding sites on the genome activating the synthesis of the target proteins. For annotation purposes, the reactions regulated by E2F1 are grouped under this pathway and information about the target genes alone are displayed for annotation purposes.

Cellular targets for activation by E2F1 include thymidylate synthase (TYMS) (DeGregori et al. 1995), Rir2 (RRM2) (DeGregori et al. 1995, Giangrande et al. 2004), Dihydrofolate reductase (DHFR) (DeGregori et al. 1995, Wells et al. 1997, Darbinian et al. 1999), Cdc2 (CDK1) (Furukawa et al. 1994, DeGregori et al. 1995, Zhu et al. 2004), Cyclin A1 (CCNA1) (DeGregori et al. 1995, Liu et al. 1998), CDC6 (DeGregori et al. 1995, Yan et al. 1998; Ohtani et al. 1998), CDT1 (Yoshida and Inoue 2004), CDC45 (Arata et al. 2000), Cyclin E (CCNE1) (Ohtani et al. 1995), Emi1 (FBXO5) (Hsu et al. 2002), and ORC1 (Ohtani et al. 1996, Ohtani et al. 1998). The activation of TK1 (Dnk1) (Dou et al. 1994, DeGregori et al. 1995, Giangrande et al. 2004) and CDC25A (DeGregori et al. 1995, Vigo et al. 1999) by E2F1 is conserved in *Drosophila* (Duronio and O'Farrell 1994, Reis and Edgar 2004).

RRM2 protein is involved in dNTP level regulation and activation of this enzyme results in higher levels of dNTPs in anticipation of S phase. E2F activation of RRM2 has been shown also in *Drosophila* by Duronio and O'Farrell (1994). E2F1 activation of CDC45 is shown in mouse cells by using human E2F1 construct (Arata et al. 2000). Cyclin E is also transcriptionally regulated by E2F1. Cyclin E protein plays important role in the transition of G1 in S phase by associating with CDK2 (Ohtani et al. 1996). E2F1-mediated activation of PCNA has been demonstrated in *Drosophila* (Duronio and O'Farrell 1994) and in some human cells by using recombinant adenovirus constructs (DeGregori et al. 1995). E2F1-mediated activation of the DNA polymerase alpha subunit p180 (POLA1) has been demonstrated in some human cells. It has also been demonstrated in *Drosophila* by Ohtani and Nevins (1994). It has been observed in *Drosophila* that E2F1 induced expression of Orc1 stimulates ORC1 6 complex formation and binding to the origin of replication (Asano and Wharton 1999). ORC1 6 recruit CDC6 and CDT1 that are required to recruit the MCM2 7 replication helicases. E2F1 regulation incorporates a feedback mechanism wherein Geminin (GMNN) can inhibit MCM2 7 recruitment of ORC1 6 complex by interacting with CDC6/CDT1. The activation of CDC25A and TK1 (Dnk1) by E2F1 has been inferred from similar events in *Drosophila* (Duronio RJ and O'Farrell 1994; Reis and Edgar 2004). E2F1 activates string (CDC25) that in turn activates the complex of Cyclin B and CDK1. A similar phenomenon has been observed in mouse NIH 3T3 cells and in Rat1 cells.

## References

- Ohtani K, Ikeda M, Nakamura M & Tsujimoto A (1998). Regulation of cell growth-dependent expression of mammalian CDC6 gene by the cell cycle transcription factor E2F. *Oncogene*, 17, 1777-85. [🔗](#)
- Wang J, Dou QP, Pardee AB, Zhao S, Helin K & Levin AH (1994). G1/S-regulated E2F-containing protein complexes bind to the mouse thymidine kinase gene promoter. *J. Biol. Chem.*, 269, 1306-13. [🔗](#)
- Hateboer G, Vigo E, Helin K, Prosperini E, Cartwright P, Moroni MC & Muller H (1999). CDC25A phosphatase is a target of E2F and is required for efficient E2F-induced S phase. *Mol Cell Biol*, 19, 6379-95. [🔗](#)
- Tretiakova A, Kundu M, Gallia GL, Khalili K, Giordano A, Shcherbik N & Darbinian N (1999). Association of Pur alpha and E2F-1 suppresses transcriptional activity of E2F-1. *Oncogene*, 18, 6398-402. [🔗](#)
- Kijima S, Ohtani K, Fujita M, Arata Y & Kato JY (2000). Cdk2-dependent and -independent pathways in E2F-mediated S phase induction. *J Biol Chem*, 275, 6337-45. [🔗](#)

## Edit history

| Date       | Action   | Author                  |
|------------|----------|-------------------------|
| 2003-06-05 | Created  | Walworth N, O'Donnell M |
| 2023-11-06 | Modified | Matthews L              |

## 2 submitted entities found in this pathway, mapping to 4 Reactome entities

| Input | UniProt Id | Input | UniProt Id |
|-------|------------|-------|------------|
| DHFR  | P00374     | TYMS  | P04818     |

| Input | Ensembl Id      | Input | Ensembl Id      |
|-------|-----------------|-------|-----------------|
| DHFR  | ENSG00000228716 | TYMS  | ENSG00000176890 |

## 7. Signaling by membrane-tethered fusions of PDGFRA or PDGFRB (R-HSA-9673768)

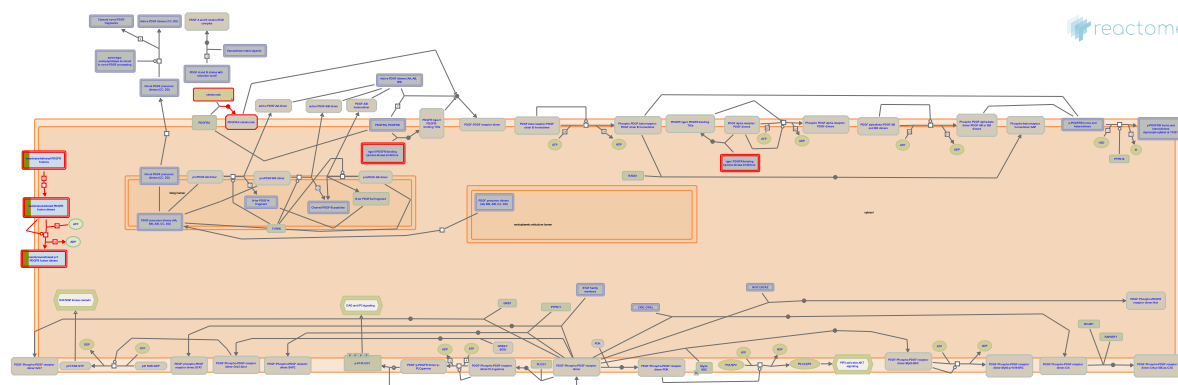

**Diseases:** cancer.

In addition to activating missense and in-frame deletion mutations, PDGFRA and PDGFRB are also subject to low frequency gene fusion events arising from chromosomal rearrangements. To date there are about 35 identified PDGFRA or B fusion partners, with PDGFRB being the more common partner (reviewed in Appiah-Kubi et al, 2017). Although some of the PDGF fusions proteins are cytosolic by virtue of removal of the PDGFR transmembrane region (TMD), a number of fusions retain the TMD and are linked to the plasma membrane (Hidalgo-Curtis et al, 2010; Ozawa et al, 2010; Curtis et al, 2007; Medves et al, 2010; reviewed in Appiah-Kubi et al, 2017). The most common transmembrane fusion partner of PDGFRA and PDGFRB is ETV6 (also known as TEL1), a transcriptional repressor with known ability to homodimerize (Curtis et al, 2007; Golub et al, 1994; Andrae et al, 2008; reviewed in de Braekeleer et al, 2012; Wang et al, 2016; Appiah-Kubi et al, 2017).

## References

- Yao X, Chen Y, Wu M, Qian H, Wang Y, Wu Y & Appiah-Kubi K (2016). The platelet-derived growth factors (PDGFs) and their receptors (PDGFRs) are major players in oncogenesis, drug resistance, and attractive oncologic targets in cancer. *Growth Factors*, 34, 64-71. [🔗](#)
- De Braekeleer E, De Braekeleer M, Douet-Guilbert N, Basinko A, Le Bris MJ & Morel F (2012). ETV6 fusion genes in hematological malignancies: a review. *Leuk. Res.*, 36, 945-61. [🔗](#)
- Betsholtz C, Andrae J & Gallini R (2008). Role of platelet-derived growth factors in physiology and medicine. *Genes Dev*, 22, 1276-312. [🔗](#)
- Grand FH, Clark A, Curtis CE, Reiter A, Minervini MM, Cross NC, ... Stewart J (2007). Two novel imatinib-responsive PDGFRA fusion genes in chronic eosinophilic leukaemia. *Br. J. Haematol.*, 138, 77-81. [🔗](#)
- Golub TR, Gilliland DG, Barker GF & Lovett M (1994). Fusion of PDGF receptor beta to a novel ets-like gene, tel, in chronic myelomonocytic leukemia with t(5;12) chromosomal translocation. *Cell*, 77, 307-16. [🔗](#)

## Edit history

| Date       | Action   | Author     |
|------------|----------|------------|
| 2020-01-08 | Created  | Rothfels K |
| 2020-02-06 | Reviewed | Ip CKM     |

| Date       | Action   | Author     |
|------------|----------|------------|
| 2020-02-25 | Edited   | Rothfels K |
| 2020-02-25 | Authored | Rothfels K |
| 2023-03-08 | Modified | Matthews L |

**1 submitted entities found in this pathway, mapping to 1 Reactome entities**

| Input | UniProt Id |
|-------|------------|
| BIN2  | Q9UBW5     |

## 8. MECP2 regulates transcription of genes involved in GABA signaling (R-HSA-9022927)

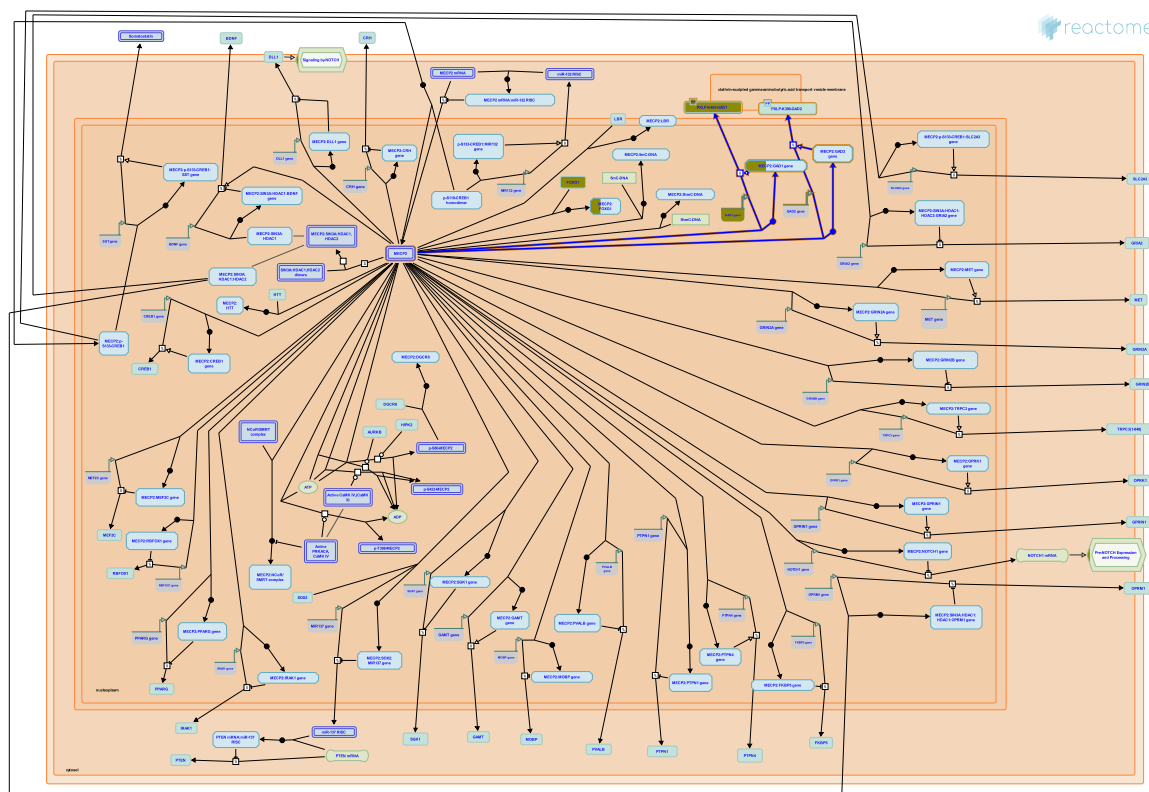

MECP2 regulates expression of several genes involved in GABA (gamma-aminobutyric acid) signaling. Transcription of GAD1 (GAD67) and GAD2 (GAD65) genes is directly positively regulated by MECP2. GAD1 and GAD2 are components of the glutamic acid decarboxylase complex involved in production of the neurotransmitter GABA. Mice lacking *Mecp2* from GABA-releasing neurons have decreased GABA levels and exhibit multiple Rett syndrome features (Chao et al. 2010).

*Mecp2* deletion in mouse GABAergic parvalbumin-expressing (PV) cells, cortical interneurons playing a key role in visual experience-induced ocular dominance plasticity, does not result in Rett-like phenotype, other than defects in motor coordination and motor learning. While functions of the visual cortex are preserved in mice lacking *Mecp2* in GABAergic PV cells, the visual input-induced spiking responses are decreased. *Mecp2* loss impairs maturation of membrane functions of cortical GABAergic PV cells. *Mecp2* may be needed for PV cell-mediated cortical GABA inhibition. *Mecp2*-deficient cortical PV cells show reduced mRNA levels of several genes involved in GABA signaling, such as Parvalbumin, *Gad2*, Calretinin, *Gabra1* and *Gabra2*, as well as reduced levels of *Glu3*, a glutamate receptor subunit, and *Kv3.1*, a potassium channel (He et al. 2014).

### References

- Chen XJ, Li YD, Zhang XH, Shu YS, He LJ, Liu N, ... Cheng TL (2014). Conditional deletion of *Mecp2* in parvalbumin-expressing GABAergic cells results in the absence of critical period plasticity. *Nat Commun*, 5, 5036. [🔗](#)
- Neul JL, Chahrour M, Xue M, Samaco RC, Noebels JL, Zoghbi HY, ... Chao HT (2010). Dysfunction in GABA signalling mediates autism-like stereotypies and Rett syndrome phenotypes. *Nature*, 468, 263-9. [🔗](#)

## Edit history

| Date       | Action   | Author                        |
|------------|----------|-------------------------------|
| 2017-09-26 | Created  | Orlic-Milacic M               |
| 2017-10-02 | Authored | Orlic-Milacic M               |
| 2018-08-07 | Reviewed | Christodoulou J, Krishnaraj R |
| 2018-08-08 | Edited   | Orlic-Milacic M               |
| 2023-03-08 | Modified | Matthews L                    |

## 1 submitted entities found in this pathway, mapping to 2 Reactome entities

| Input | UniProt Id |
|-------|------------|
| GAD1  | Q99259     |

| Input | Ensembl Id      |
|-------|-----------------|
| GAD1  | ENSG00000128683 |

9. PP2A-mediated dephosphorylation of key metabolic factors (R-HSA-163767)

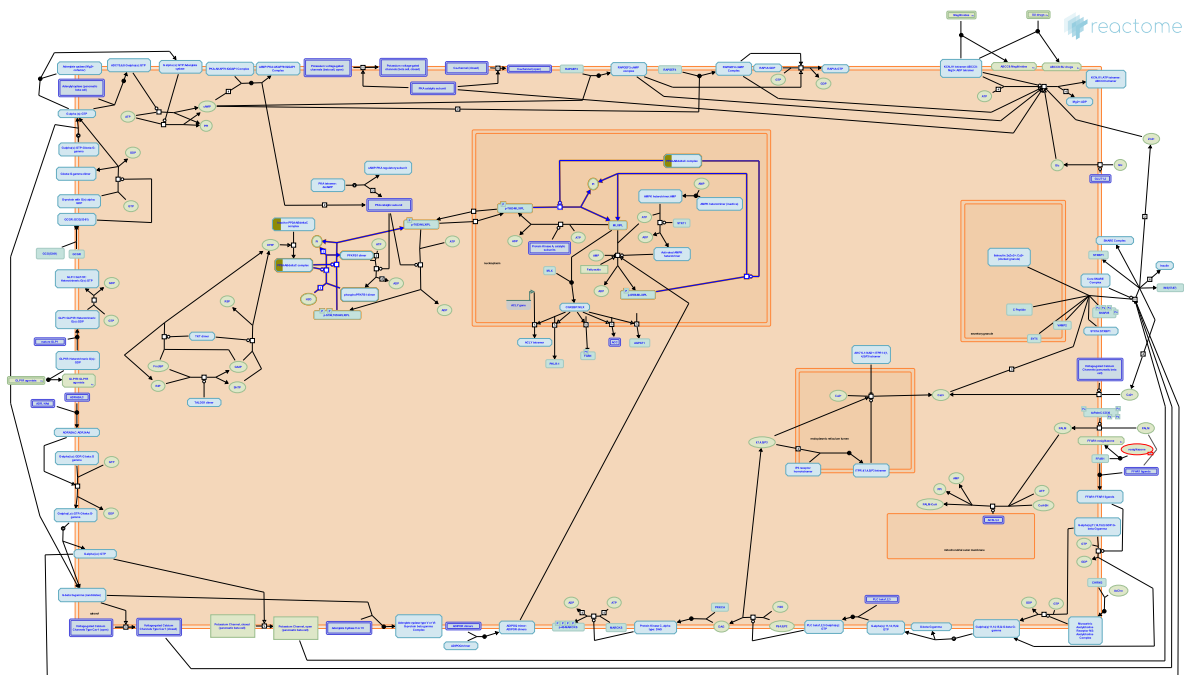

**Cellular compartments:** nucleoplasm, cytosol.

A member of the PP2A family of phosphatases dephosphorylates both cytosolic and nuclear forms of ChREBP (Carbohydrate Response Element Binding Protein). In the nucleus, dephosphorylated ChREBP complexes with MLX protein and binds to ChRE sequence elements in chromosomal DNA, activating transcription of genes involved in glycolysis and lipogenesis. The phosphatase is activated by Xylulose-5-phosphate, an intermediate of the pentose phosphate pathway (Kabashima et al. 2003). The rat enzyme has been purified to homogeneity and shown by partial amino acid sequence analysis to differ from previously described PP2A phosphatases (Nishimura and Uyeda 1995) - the human enzyme has not been characterized.

References

Veech RL (2003). A humble hexose monophosphate pathway metabolite regulates short- and long-term control of lipogenesis. Proc Natl Acad Sci U S A, 100, 5578-80. [🔗](#)

Edit history

| Date       | Action   | Author        |
|------------|----------|---------------|
| 2005-05-06 | Created  | Gopinathrao G |
| 2005-05-13 | Authored | Gopinathrao G |
| 2023-10-12 | Modified | Weiser JD     |

1 submitted entities found in this pathway, mapping to 1 Reactome entities

| Input  | UniProt Id |
|--------|------------|
| PPP2CB | P62714     |



10. Defective CHST3 causes SEDCJD (R-HSA-3595172)

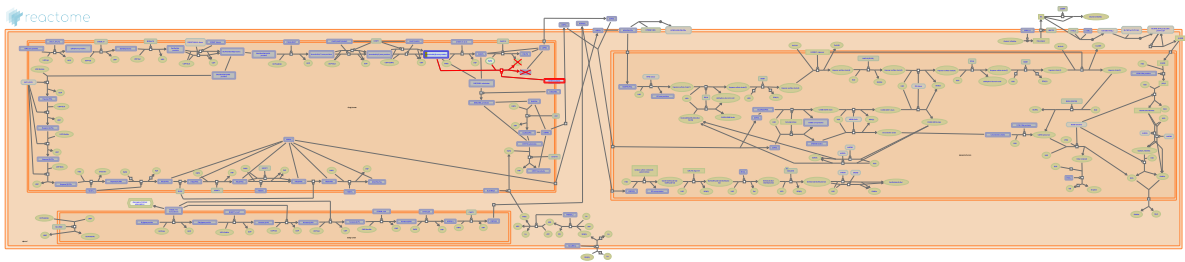

**Diseases:** spondyloepimetaphyseal dysplasia.

Carbohydrate sulfotransferase 3 (CHST3) transfers sulfate (SO4(2-)) to position 6 of N-acetylgalactosamine (GalNAc) residues of chondroitin-containing proteins resulting in chondroitin sulfate (CS), the predominant glycosaminoglycan present in cartilage. Defects in CHST3 result in spondyloepiphyseal dysplasia with congenital joint dislocations (SEDCJD; MIM:143095), a bone dysplasia clinically characterized by severe progressive kyphoscoliosis (abnormal curvature of the spine), arthritic changes with joint dislocations and short stature in adulthood (Unger et al. 2010).

References

Chandler K, Nampoothiri S, Bonafe L, Wakeling E, Aytes A, Unger S, ... Velten T (2010). Phenotypic features of carbohydrate sulfotransferase 3 (CHST3) deficiency in 24 patients: congenital dislocations and vertebral changes as principal diagnostic features. Am. J. Med. Genet. A, 152, 2543-9

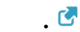

Edit history

| Date       | Action   | Author      |
|------------|----------|-------------|
| 2013-05-21 | Edited   | Jassal B    |
| 2013-05-21 | Authored | Jassal B    |
| 2013-05-21 | Created  | Jassal B    |
| 2014-07-09 | Reviewed | Spillmann D |
| 2023-10-12 | Modified | Weiser JD   |

1 submitted entities found in this pathway, mapping to 1 Reactome entities

| Input | UniProt Id |
|-------|------------|
| VCAN  | P13611     |

## 11. Defective CHST14 causes EDS, musculocontractural type ([R-HSA-3595174](#))

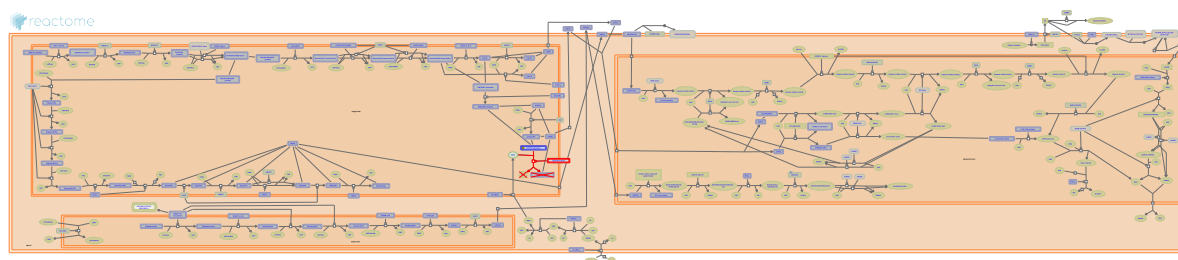

**Diseases:** Ehlers-Danlos syndrome.

Carbohydrate sulfotransferase 14 (CHST14 also known as D4ST-1) mediates the transfer of sulfate to position 4 of further N-acetylgalactosamine (GalNAc) residues of dermatan sulfate (DS). Defects in CHST14 cause Ehlers-Danlos syndrome, musculocontractural type (MIM:601776). The Ehlers-Danlos syndromes (EDS) are a group of connective tissue disorders that share common features such as skin hyperextensibility, articular hypermobility and tissue fragility (Beighton et al. 1998). The musculocontractural form of EDS (MIM:601776) include distinctive characteristics such as craniofacial dysmorphism, congenital contractures of fingers and thumbs, clubfeet, severe kyphoscoliosis and muscular hypotonia (Malfait et al. 2010).

### References

- Syx D, De Paepe A, Van Laer L, Nampoothiri S, Symoens S, Malfait F, ... Hermanns-Lê T (2010). Musculocontractural Ehlers-Danlos Syndrome (former EDS type VIB) and adducted thumb clubfoot syndrome (ATCS) represent a single clinical entity caused by mutations in the dermatan-4-sulfotransferase 1 encoding CHST14 gene. *Hum. Mutat.*, 31, 1233-9. [🔗](#)
- Tsipouras P, Beighton P, Wenstrup RJ, De Paepe A & Steinmann B (1998). Ehlers-Danlos syndromes: revised nosology, Villefranche, 1997. Ehlers-Danlos National Foundation (USA) and Ehlers-Danlos Support Group (UK). *Am. J. Med. Genet.*, 77, 31-7. [🔗](#)

### Edit history

| Date       | Action   | Author      |
|------------|----------|-------------|
| 2013-05-21 | Edited   | Jassal B    |
| 2013-05-21 | Authored | Jassal B    |
| 2013-05-21 | Created  | Jassal B    |
| 2014-07-09 | Reviewed | Spillmann D |
| 2023-10-12 | Modified | Weiser JD   |

**1 submitted entities found in this pathway, mapping to 1 Reactome entities**

| Input | UniProt Id |
|-------|------------|
| VCAN  | P13611     |

## 12. Defective CHSY1 causes TPBS ([R-HSA-3595177](#))

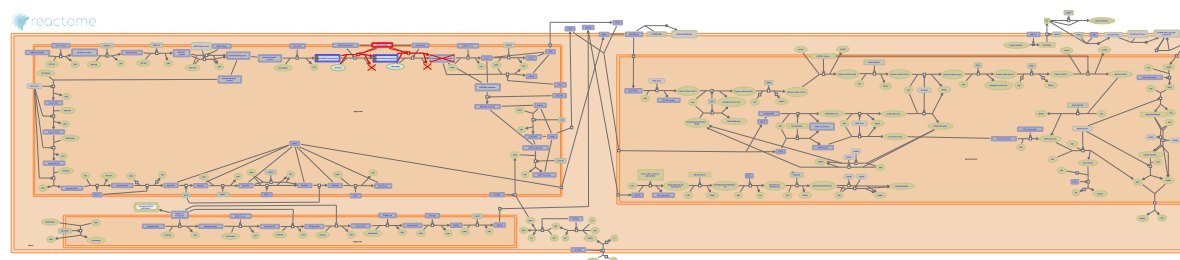

**Diseases:** brachydactyly.

Chondroitin sulfate synthases (CHSY) are involved in the synthesis of chondroitin sulfate, adding alternately glucuronate (GlcA) and N-acetylgalactosamine (GalNAc) to the growing chondroitin polymer (Mizumoto et al. 2013). Defects in CHSY1 cause temtamy preaxial brachydactyly syndrome (TPBS; MIM:605282), a syndrome characterized by multiple congenital anomalies, mental retardation, sensorineural deafness, growth retardation and bilateral symmetric digital anomalies mainly in the form of preaxial brachydactyly (literally, shortness of fingers and toes) and hyperphalangism (Temtamy et al. 1998, Race et al. 2010, Tian et al. 2010).

### References

- Sugahara K, Ikegawa S & Mizumoto S (2013). Human genetic disorders caused by mutations in genes encoding biosynthetic enzymes for sulfated glycosaminoglycans. *J. Biol. Chem.*, 288, 10953-61. [↗](#)
- Ling L, Lee H, Al-Hadidy A, Ababneh OH, Hamamy H, O'Connor B, ... Cool S (2010). Loss of CHSY1, a secreted FRINGE enzyme, causes syndromic brachydactyly in humans via increased NOTCH signaling. *Am J Hum Genet*, 87, 768-78. [↗](#)
- Hall CM, Race H, Wakeling EL, Harrison MG & Quarrell OW (2010). A distinct autosomal recessive disorder of limb development with preaxial brachydactyly, phalangeal duplication, symphalangism and hyperphalangism. *Clin. Dysmorphol.*, 19, 23-7. [↗](#)
- Temtamy SA, Ramzy MI, Ismail SI & Meguid NA (1998). A new multiple congenital anomaly, mental retardation syndrome with preaxial brachydactyly, hyperphalangism, deafness and orodental anomalies. *Clin. Dysmorphol.*, 7, 249-55. [↗](#)

### Edit history

| Date       | Action   | Author      |
|------------|----------|-------------|
| 2013-05-21 | Edited   | Jassal B    |
| 2013-05-21 | Authored | Jassal B    |
| 2013-05-21 | Created  | Jassal B    |
| 2014-07-09 | Reviewed | Spillmann D |
| 2023-10-12 | Modified | Weiser JD   |

**1 submitted entities found in this pathway, mapping to 1 Reactome entities**

| Input | UniProt Id |
|-------|------------|
| VCAN  | P13611     |



13. Synthesis of IPs in the ER lumen (R-HSA-1855231)

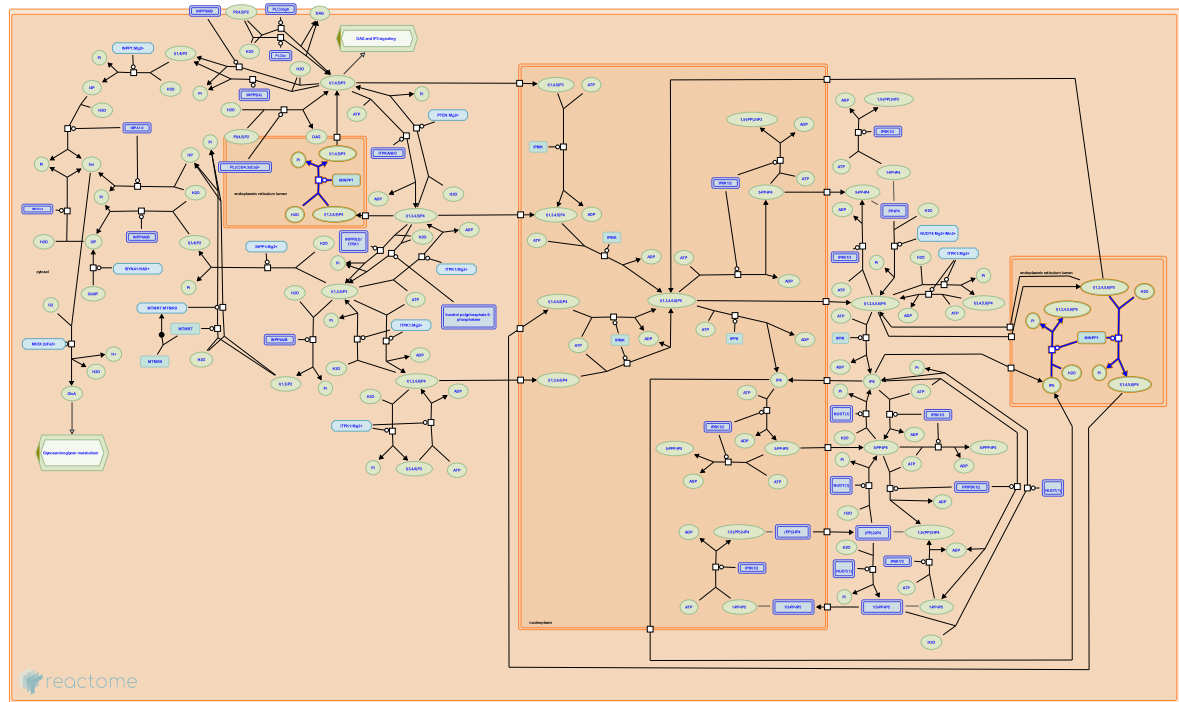

In the endoplasmic reticulum (ER) lumen, inositol phosphates IP4, IP5, and IP6 are dephosphorylated by multiple inositol polyphosphate phosphatase 1 (MINPP1) (Caffrey et al. 1999, Chi et al. 1999, Deleu et al. 2006, Nogimori et al. 1991).

References

Chi H, Reynolds PR, O'keefe RJ, Romano PR, Rosier RN, Wang J, ... Puzas JE (1999). Multiple inositol polyphosphate phosphatase: evolution as a distinct group within the histidine phosphatase family and chromosomal localization of the human and mouse genes to chromosomes 10q23 and 19. *Genomics*, 56, 324-36. [🔗](#)

Hughes PJ, Hodgson ME, Putney JW Jr, Glennon MC, Shears SB & Nogimori K (1991). Purification of an inositol (1,3,4,5)-tetrakisphosphate 3-phosphatase activity from rat liver and the evaluation of its substrate specificity. *J Biol Chem*, 266, 16499-506. [🔗](#)

Hidaka K, Matsuda M, Caffrey JJ, Hirata M & Shears SB (1999). The human and rat forms of multiple inositol polyphosphate phosphatase: functional homology with a histidine acid phosphatase up-regulated during endochondral ossification. *FEBS Lett*, 442, 99-104. [🔗](#)

Cho J, Choi K, Sulis ML, Pesesse X, Parsons R, Deleu S & Shears SB (2006). Physiological levels of PTEN control the size of the cellular Ins(1,3,4,5,6)P(5) pool. *Cell Signal*, 18, 488-98. [🔗](#)

Edit history

| Date       | Action   | Author       |
|------------|----------|--------------|
| 2011-10-28 | Edited   | Williams MG  |
| 2011-10-28 | Authored | Williams MG  |
| 2011-10-28 | Created  | Williams MG  |
| 2012-11-07 | Reviewed | Wundenberg T |
| 2023-11-16 | Modified | Wright A     |

### Interactors found in this pathway (1)

| Input  | UniProt Id | Interacts with | Input | UniProt Id | Interacts with |
|--------|------------|----------------|-------|------------|----------------|
| UBQLN2 | Q9UHD9     | Q9UNW1         |       |            |                |

## 14. N-glycan antennae elongation in the medial/trans-Golgi (R-HSA-975576)

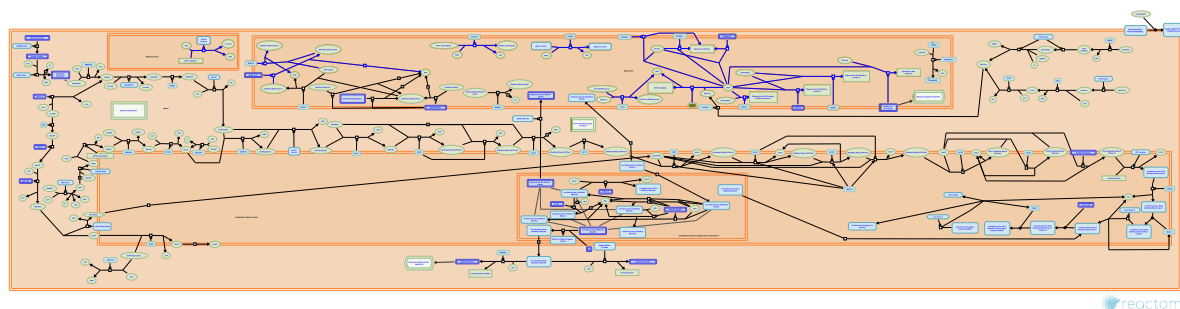

In the latter compartments of the distal Golgi the N-Glycan is further modified, leading to the wide range of N-Glycans observed in multicellular organisms. The first step of N-Glycan elongation in the Golgi is the addition of a GlcNAc residue on the alpha 1,3 branch by the enzyme MGAT1 (GlcNAc-TI), which commits the elongation pathway to Complex or Hybrid N-Glycans from Oligo-mannose N-Glycans. At this point, the pathway bifurcates again to generate Complex or Hybrid N-Glycans. The addition of a GlcNAc in the middle of the two arms of the N-Glycan, catalyzed by MGAT3 (GNT-III), inhibits the removal of the mannoses on the alpha1,3 branches by MAN2 and the addition of a GlcNAc by MGAT2 (GlcNAc-TII), and commits the pathway toward the synthesis of hybrid N-Glycans. Alternatively, the removal of these mannoses and the action of MGAT2 leads to the synthesis of complex N-Glycans (Kornfeld and Kornfeld 1985).

The exact structure of the network of reactions leading to Complex or Hybrid N-Glycans is still not completely described and validated experimentally. Here we will annotate only one generic reaction for each of the enzymes known to participate in this process. For a better annotation on the reactions and genes involved in the synthesis of Complex and Hybrid N-Glycans we recommend the GlycoGene Database (Ito H. et al, 2010) (<http://riodb.ibase.aist.go.jp/rcmg/ggdb/textsearch.jsp>) for annotations on genes, and the Consortium for Functional Genomics (<http://riodb.ibase.aist.go.jp/rcmg/ggdb/textsearch.jsp>) for annotation of Glycan structures and reactions. Moreover, a computationally inferred prediction on the structure of this network is available through the software GlycoVis (Hossler P. et. al. 2006).

### References

- Kornfeld S & Kornfeld R (1985). Assembly of asparagine-linked oligosaccharides. *Annu Rev Biochem*, 54, 631-64. [🔗](#)
- Hu WS, Lee MM, Hossler P & Goh LT (2006). GlycoVis: visualizing glycan distribution in the protein N-glycosylation pathway in mammalian cells. *Biotechnol Bioeng*, 95, 946-60. [🔗](#)
- Schachter H (2000). The joys of HexNAc. The synthesis and function of N- and O-glycan branches. *Glycoconj J*, 17, 465-83. [🔗](#)
- Ito H, Narimatsu H, Sato T, Kameyama A & Chiba Y (2010). In vitro and in vivo enzymatic syntheses and mass spectrometric database for N-glycans and o-glycans. *Methods Enzymol*, 478, 127-49. [🔗](#)

### Edit history

| Date       | Action   | Author       |
|------------|----------|--------------|
| 2009-11-10 | Authored | Dall'Olio GM |
| 2010-09-30 | Edited   | Jassal B     |
| 2010-09-30 | Created  | Jassal B     |

| Date       | Action   | Author    |
|------------|----------|-----------|
| 2010-11-18 | Reviewed | Gagneux P |
| 2023-11-16 | Modified | Wright A  |

**2 submitted entities found in this pathway, mapping to 2 Reactome entities**

| Input   | UniProt Id | Input | UniProt Id |
|---------|------------|-------|------------|
| B4GALT2 | O60909     | FUT8  | Q9BYC5     |



## 15. Opsins (R-HSA-419771)

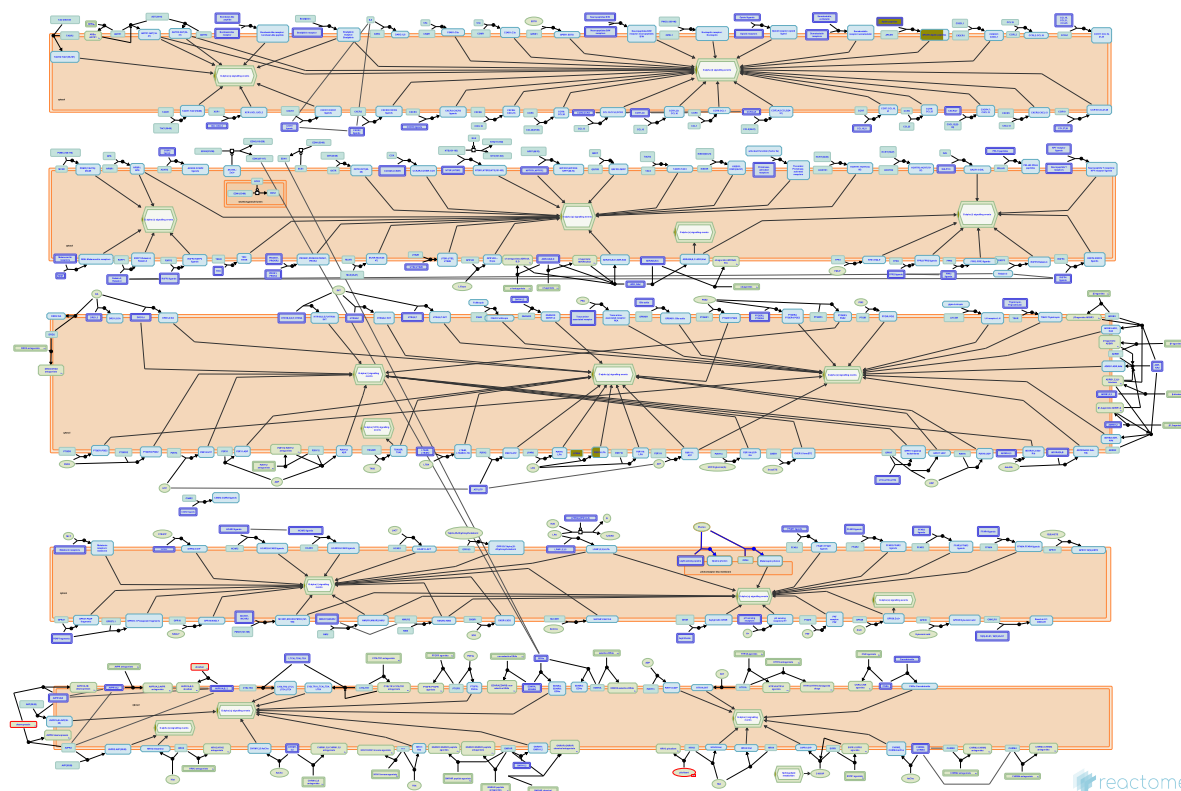

Opsins are light-sensitive, 35-55 kDa membrane-bound G protein-coupled receptors of the retinylidene protein family found in photoreceptor cells of the retina. Five classical groups of opsins are involved in vision, mediating the conversion of a photon of light into an electrochemical signal, the first step in the visual transduction cascade (Terakita A, 2005; Nickle B and Robinson PR, 2007). Another opsin found in the mammalian retina, melanopsin, is involved in circadian rhythms and pupillary reflex but not in image-forming (Hankins MW et al, 2008; Kumbalasiri T and Provencio I, 2005). Guanine nucleotide-binding proteins (G proteins) are involved as modulators or transducers in various transmembrane signaling systems. The G protein transducin, encoded by GNAT genes, is one of the transducers of a visual impulse that performs the coupling between rhodopsin and cGMP-phosphodiesterase. Defects in GNAT1 are the cause of congenital stationary night blindness autosomal dominant type 3, also known as congenital stationary night blindness Nougaret type. Congenital stationary night blindness is a non-progressive retinal disorder characterized by impaired night vision (Dryja TP et al, 1996). Defects in GNAT2 are the cause of achromatopsia type 4 (ACHM4). Achromatopsia is an autosomal recessively inherited visual disorder that is present from birth and that features the absence of color discrimination (Kohl S et al, 2002).

## References

- Provencio I & Kumbalasiri T (2005). Melanopsin and other novel mammalian opsins. *Exp Eye Res*, 81, 368-75. [↗](#)
- Hahn LB, Reboul T, Arnaud B & Dryja TP (1996). Missense mutation in the gene encoding the alpha subunit of rod transducin in the Nougaret form of congenital stationary night blindness. *Nat Genet*, 13, 358-60. [↗](#)
- Terakita A (2005). The opsins. *Genome Biol*, 6, 213. [↗](#)

Kohl S, Vadalà M, Lorenz B, Rosenberg T, Wissinger B, Jacobson SG, ... Baumann B (2002). Mutations in the cone photoreceptor G-protein alpha-subunit gene GNAT2 in patients with achromatopsia. *Am J Hum Genet*, 71, 422-5. [🔗](#)

Peirson SN, Hankins MW & Foster RG (2008). Melanopsin: an exciting photopigment. *Trends Neurosci*, 31, 27-36. [🔗](#)

### Edit history

| Date       | Action   | Author        |
|------------|----------|---------------|
| 2009-05-07 | Edited   | Jassal B      |
| 2009-05-07 | Authored | Jassal B      |
| 2009-05-07 | Created  | Jassal B      |
| 2009-05-29 | Reviewed | D'Eustachio P |
| 2023-11-16 | Modified | Wright A      |

### Interactors found in this pathway (1)

| Input  | UniProt Id | Interacts with | Input | UniProt Id | Interacts with |
|--------|------------|----------------|-------|------------|----------------|
| UBQLN2 | Q9UHD9     | Q9UHM6         |       |            |                |

16. RHO GTPases activate KTN1 (R-HSA-5625970)

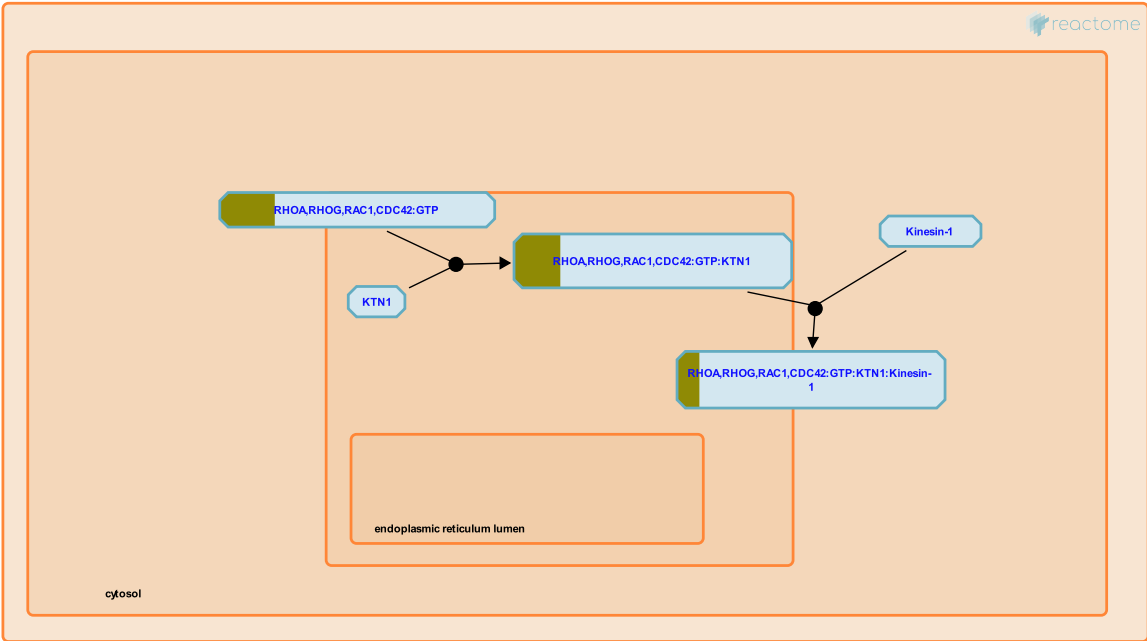

**Cellular compartments:** endoplasmic reticulum membrane, cytosol.

GTP-bound active forms of RHO GTPases RHOA, RHOG, RAC1 and CDC42 bind kinectin (KTN1), a protein inserted in endoplasmic reticulum membranes that interacts with the cargo-binding site of kinesin and activates its microtubule-stimulated ATPase activity required for vesicle motility (Vignal et al. 2001, Hotta et al. 1996). The effect of RHOG activity on cellular morphology, exhibited in the formation of microtubule-dependent cellular protrusions, depends both on RHOG interaction with KTN1, as well as on the kinesin activity (Vignal et al. 2001). RHOG and KTN1 also cooperate in microtubule-dependent lysosomal transport (Vignal et al. 2001). The precise mechanism of kinectin-mediated Rho GTPase signaling cascade needs further elucidation, and only the first two steps, KTN1-activated RHO GTPase binding, and KTN1-kinesin-1 binding are annotated here.

References

Blangy A, Gauthier-Rouvière C, Vignal E, Martin M & Fort P (2001). Kinectin is a key effector of RhoG microtubule-dependent cellular activity. *Mol. Cell. Biol.*, 21, 8022-34. [🔗](#)

Mino A, Kohno H, Hotta K, Takai Y & Tanaka K (1996). Interaction of the Rho family small G proteins with kinectin, an anchoring protein of kinesin motor. *Biochem. Biophys. Res. Commun.*, 225, 69-74. [🔗](#)

Edit history

| Date       | Action   | Author          |
|------------|----------|-----------------|
| 2014-10-09 | Created  | Orlic-Milacic M |
| 2014-10-24 | Authored | Orlic-Milacic M |
| 2014-12-26 | Authored | Rivero Crespo F |
| 2015-02-02 | Edited   | Orlic-Milacic M |
| 2023-11-16 | Modified | Wright A        |

**1 submitted entities found in this pathway, mapping to 1 Reactome entities**

| Input | UniProt Id |
|-------|------------|
| RAC1  | P63000     |

17. NTRK2 activates RAC1 (R-HSA-9032759)

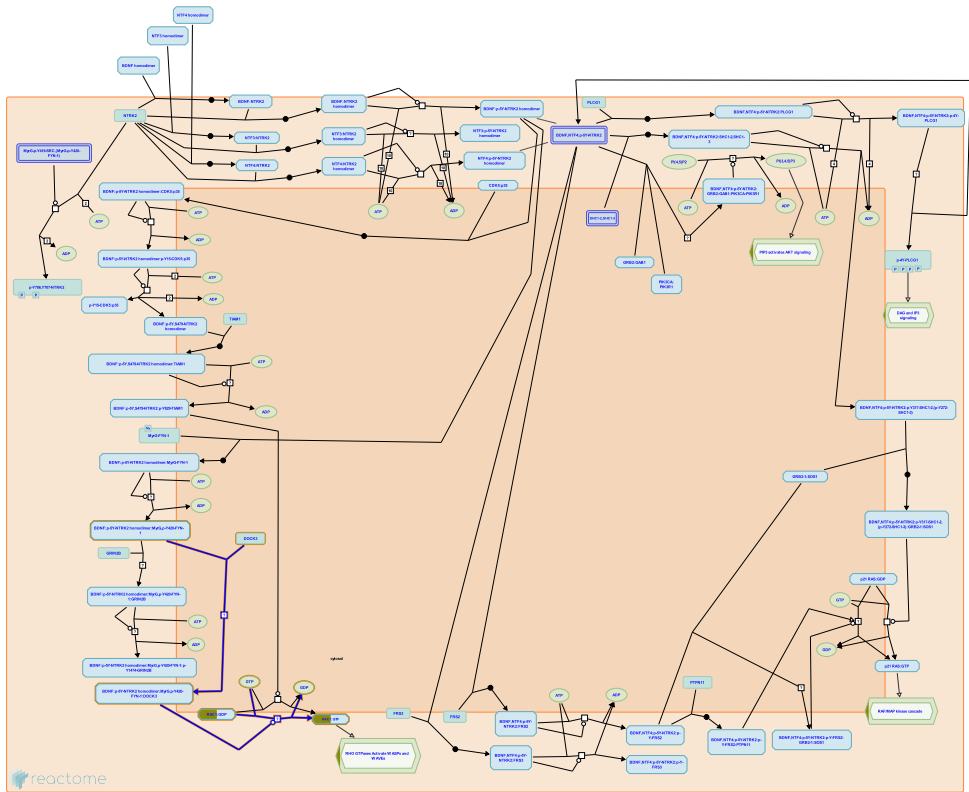

DOCK3-mediated activation of RAC1 downstream of BDNF-induced signaling by NTRK2 (TRKB) plays a role in axonal growth and regeneration. DOCK3 can be recruited to the plasma membrane to activate RAC1 by binding to NTRK-associated FYN (Namekata et al. 2010). Alternatively, DOCK3 can, upon poorly elucidated RHOG activation by the BDNF:NTRK2 complex, bind to the RHOG:GTP complex and activate RAC1 in an ELMO1-dependent manner (Namekata et al. 2012).

References

Harada T, Namekata K, Guo X, Harada C, Parada LF, Kimura H & Taya C (2010). Dock3 induces axonal outgrowth by stimulating membrane recruitment of the WAVE complex. Proc. Natl. Acad. Sci. U.S.A., 107, 7586-91. [🔗](#)

Harada T, Watanabe H, Namekata K, Kimura A, Guo X, Harada C, ... Kittaka D (2012). Dock3 regulates BDNF-TrkB signaling for neurite outgrowth by forming a ternary complex with Elmo and RhoG. Genes Cells, 17, 688-97. [🔗](#)

Edit history

| Date       | Action   | Author              |
|------------|----------|---------------------|
| 2017-12-18 | Created  | Orlic-Milacic M     |
| 2018-01-05 | Authored | Orlic-Milacic M     |
| 2018-02-13 | Reviewed | Antila H, Castrén E |
| 2018-02-20 | Edited   | Orlic-Milacic M     |
| 2023-11-16 | Modified | Wright A            |

1 submitted entities found in this pathway, mapping to 1 Reactome entities

| Input | UniProt Id |
|-------|------------|
| RAC1  | P63000     |

18. Regulation of signaling by NODAL (R-HSA-1433617)

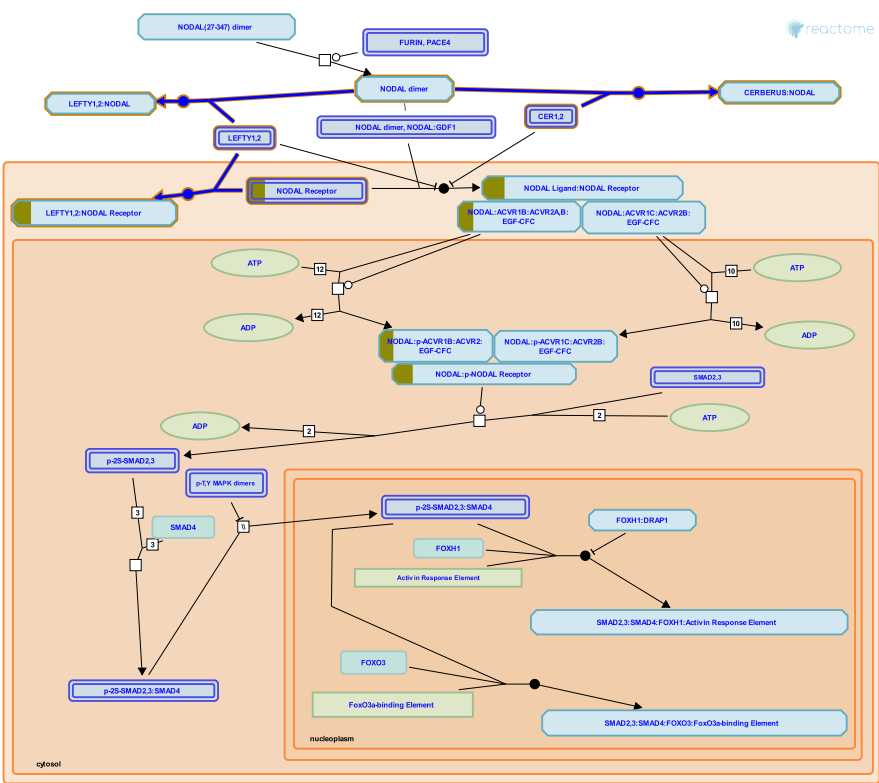

**Cellular compartments:** plasma membrane, extracellular region.

Mature NODAL can form heterodimers with LEFTY1, LEFTY2, or CERBERUS. The heterodimers do not activate the NODAL receptor. LEFTY1 and LEFTY2 also bind CRIPTO and CRYPTIC coreceptors and prevent them from interacting with other components of the NODAL receptor. By these mechanisms LEFTY1, LEFTY2, and CERBERUS negatively regulate NODAL signaling (reviewed in Shen 2007, Schier 2009).

References

Shen MM (2007). Nodal signaling: developmental roles and regulation. *Development*, 134, 1023-34.

Schier AF (2009). Nodal morphogens. *Cold Spring Harb Perspect Biol*, 1, a003459.

Edit history

| Date       | Action   | Author    |
|------------|----------|-----------|
| 2011-07-11 | Edited   | May B     |
| 2011-07-11 | Authored | May B     |
| 2011-07-12 | Created  | May B     |
| 2011-08-18 | Reviewed | May B     |
| 2023-10-12 | Modified | Weiser JD |

1 submitted entities found in this pathway, mapping to 1 Reactome entities

| Input  | UniProt Id |
|--------|------------|
| ACVR2A | P27037     |



19. Inactivation of CDC42 and RAC1 (R-HSA-428543)

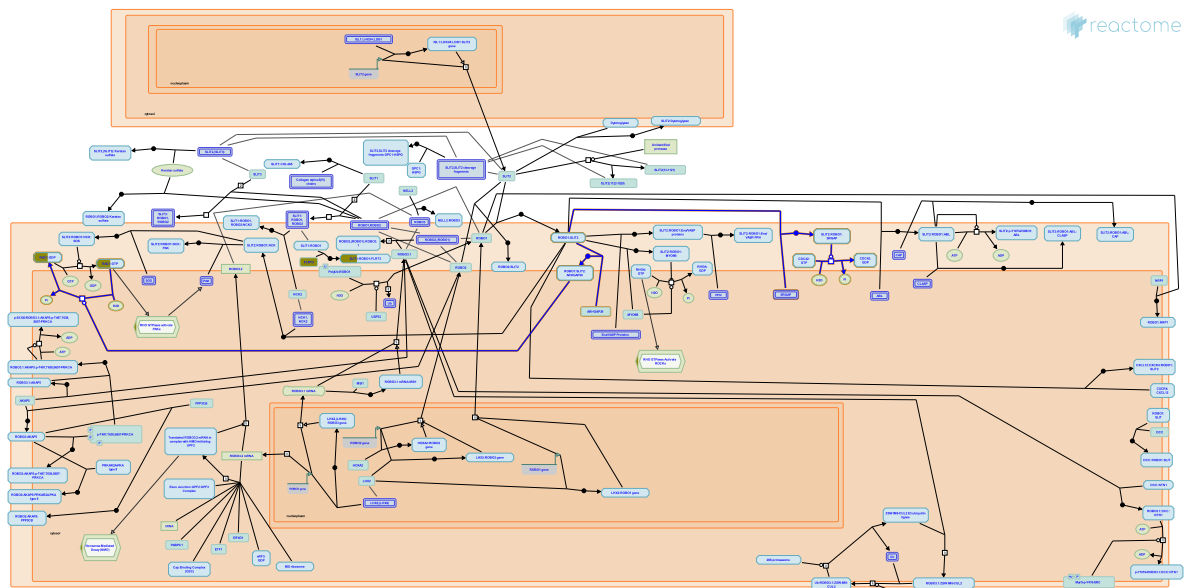

**Cellular compartments:** plasma membrane.

Rho family GTPases, including RAC1, RHOA, and CDC42, are ideal candidates to regulate aspects of cytoskeletal dynamics downstream of axon guidance receptors. Biochemical and genetic studies have revealed an important role for CDC42 and RAC1 in ROBO repulsion. ROBO controls the activity of Rho GTPases by interacting with a family of SLIT/ROBO-specific GAPs (SrGAPs) and Vilse/CrossGAP. SrGAPs inactivate CDC42 and Vilse/CrossGAP specifically inactivates RAC1.

It was recently implicated that SRGAP3 may inactivate RAC1 downstream of SLIT1-activated ROBO2, which promotes neurite outgrowth in mammalian dorsal root ganglion (DRG) neurons (Zhang et al. 2014).

References

Edit history

| Date       | Action   | Author          |
|------------|----------|-----------------|
| 2008-09-05 | Edited   | Garapati P V    |
| 2008-09-05 | Authored | Garapati P V    |
| 2009-07-06 | Created  | Garapati P V    |
| 2009-08-18 | Reviewed | Kidd T          |
| 2017-06-26 | Edited   | Orlic-Milacic M |
| 2017-07-31 | Reviewed | Jaworski A      |
| 2023-10-12 | Modified | Weiser JD       |

1 submitted entities found in this pathway, mapping to 1 Reactome entities

| Input | UniProt Id |
|-------|------------|
| RAC1  | P63000     |



## 20. Dermatan sulfate biosynthesis (R-HSA-2022923)

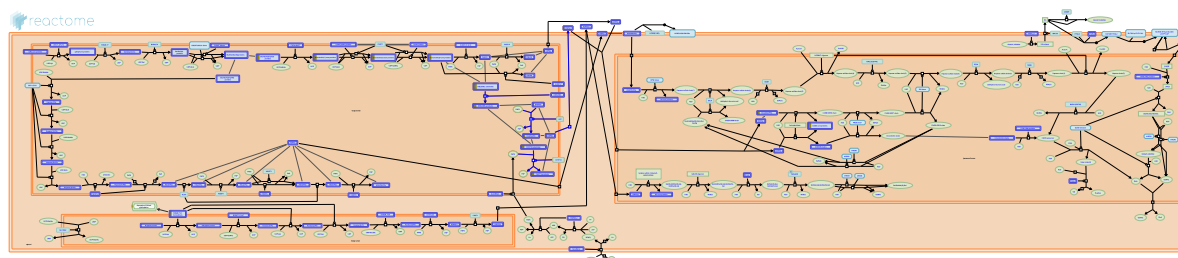

Dermatan sulfate (DS) consists of N-acetylgalactosamine (GalNAc) residues alternating in glycosidic linkages with glucuronic acid (GlcA) or iduronic acid (IdoA) residues. As with CS, GalNAc residues can be sulfated in CS chains but also the uronic acid

residues may be substituted with sulfate at the 2- and 4- positions. The steps below outline the synthesis of a simple DS chain (Silbert & Sugumaran 2002).

### References

Sugumaran G & Silbert JE (2002). Biosynthesis of chondroitin/dermatan sulfate. *IUBMB Life*, 54, 177-86. [🔗](#)

### Edit history

| Date       | Action   | Author        |
|------------|----------|---------------|
| 2011-12-01 | Edited   | Jassal B      |
| 2011-12-01 | Authored | Jassal B      |
| 2011-12-01 | Created  | Jassal B      |
| 2012-03-28 | Reviewed | D'Eustachio P |
| 2023-11-16 | Modified | Wright A      |

**1 submitted entities found in this pathway, mapping to 1 Reactome entities**

| Input | UniProt Id |
|-------|------------|
| VCAN  | P13611     |

21. Vitamin B1 (thiamin) metabolism (R-HSA-196819)

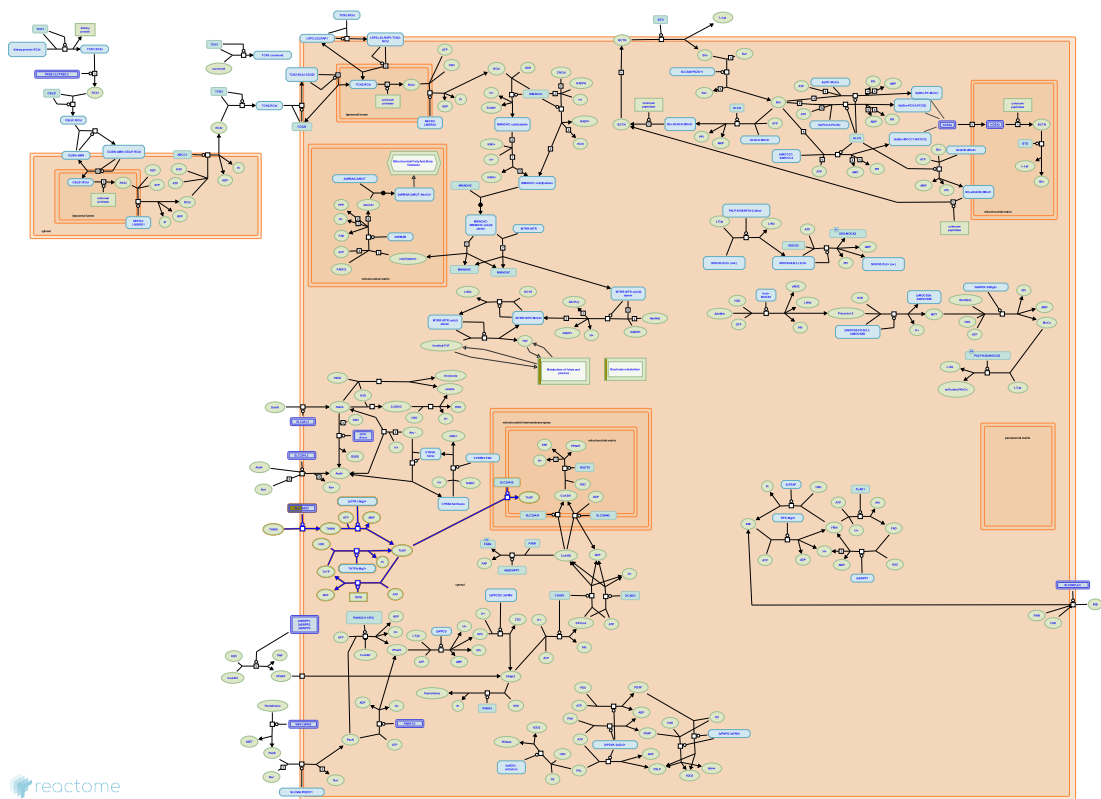

Vitamin B1 (thiamin) is found naturally in certain foodstuffs such as green peas, spinach, liver, bananas, whole grains and legumes. Human diseases associated with thiamin deficiency include beriberi, due to a thiamin-deficient diet, TMRA, due to defects in the SLC19A2 transport protein, and Wernicke-Korsakoff Syndrome, associated with thiamin deficiency in alcoholism (Haas 1988). Thiamin is water-soluble so is not stored in the body. When pyrophosphorylated, thiamin is converted into the coenzyme thiamin pyrophosphate (ThPP, codecarboxylase) which plays an essential role in oxidative decarboxylation and group transfer reactions.

References

Haas RH (1988). Thiamin and the brain. Annu Rev Nutr, 8, 483-515. [🔗](#)

Edit history

| Date       | Action   | Author   |
|------------|----------|----------|
| 2007-04-24 | Authored | Jassal B |
| 2007-04-24 | Created  | Jassal B |
| 2023-11-17 | Modified | Wright A |

1 submitted entities found in this pathway, mapping to 1 Reactome entities

| Input   | UniProt Id |
|---------|------------|
| SLC19A2 | O60779     |

## 22. Signaling by GSK3beta mutants (R-HSA-5339716)

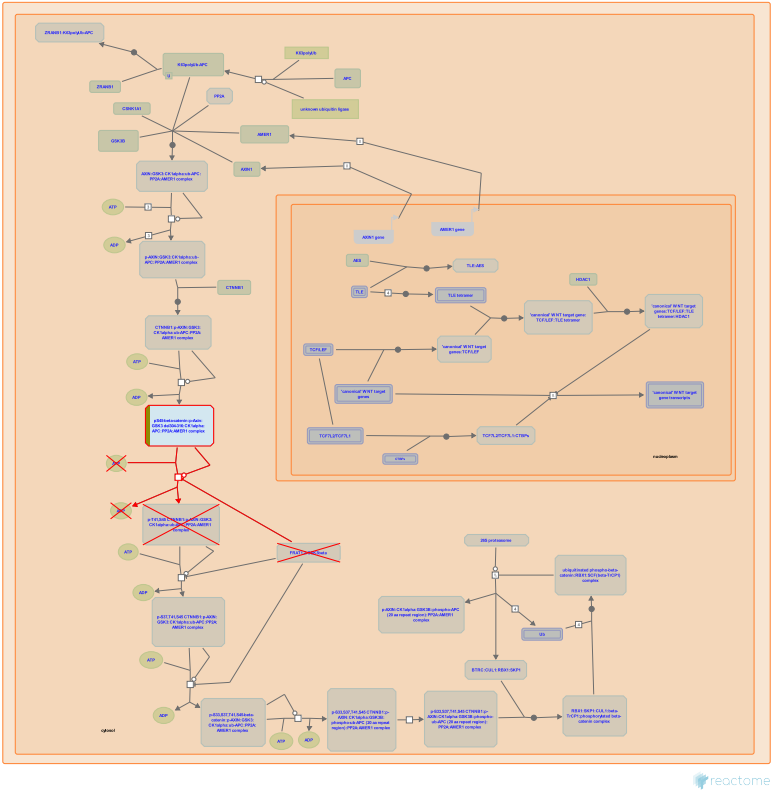

**Cellular compartments:** cytosol.

**Diseases:** chronic myeloid leukemia.

GSK3beta is subject to in-frame missplicing in CML stem cells resulting in the production of mutant protein that lacks the AXIN and FRAT binding domains. Cells containing this mutant GSK3beta show elevated levels of nuclear beta-catenin and enhanced TCF-dependent reporter activity (Jamieson et al, 2008; Abrahamsson et al, 2009).

### References

- Weissman IL, Jones C, Jamieson CH, Manz MG, Gotlib J, Ailles LE, ... Sawyers CL (2004). Granulocyte-macrophage progenitors as candidate leukemic stem cells in blast-crisis CML. *N. Engl. J. Med.*, 351, 657-67. [🔗](#)
- Weissman IL, Creusot RS, Newton IG, Barroga CF, Abrahamsson AE, Negrin RS, ... Dao KH (2009). Glycogen synthase kinase 3beta missplicing contributes to leukemia stem cell generation. *Proc. Natl. Acad. Sci. U.S.A.*, 106, 3925-9. [🔗](#)

### Edit history

| Date       | Action   | Author      |
|------------|----------|-------------|
| 2014-02-22 | Authored | Rothfels K  |
| 2014-03-08 | Created  | Rothfels K  |
| 2014-04-03 | Edited   | Matthews L  |
| 2014-05-12 | Reviewed | Salahshor S |
| 2014-05-22 | Reviewed | Woodgett J  |

| Date       | Action   | Author   |
|------------|----------|----------|
| 2023-11-28 | Modified | Wright A |

**1 submitted entities found in this pathway, mapping to 1 Reactome entities**

| Input  | UniProt Id |
|--------|------------|
| PPP2CB | P62714     |

23. ERKs are inactivated (R-HSA-202670)

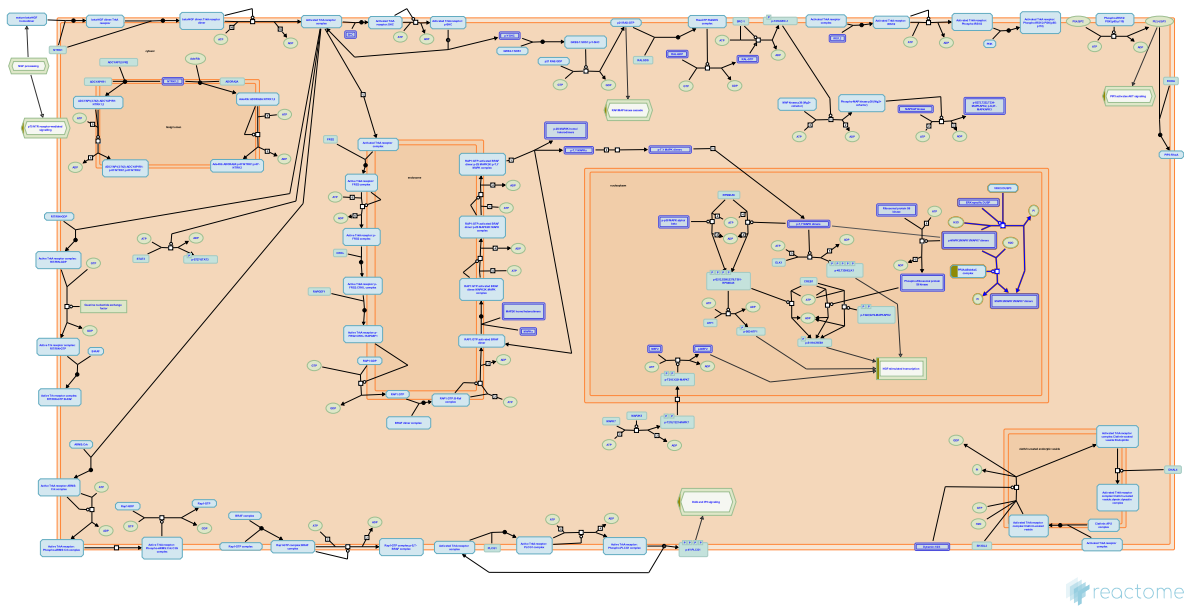

MAP Kinases are inactivated by a family of protein named MAP Kinase Phosphatases (MKPs). They act through dephosphorylation of threonine and/or tyrosine residues within the signature sequence -pTXpY- located in the activation loop of MAP kinases (pT=phosphothreonine and pY=phosphotyrosine). MKPs are divided into three major categories depending on their preference for dephosphorylating; tyrosine, serine/threonine and both the tyrosine and threonine (dual specificity phosphatases or DUSPs). The tyrosine-specific MKPs include PTP-SL, STEP and HePTP, serine/threonine-specific MKPs are PP2A and PP2C, and many DUSPs acting on MAPKs are known. Activated MAP kinases trigger activation of transcription of MKP genes. Therefore, MKPs provide a negative feedback regulatory mechanism on MAPK signaling, by inactivating MAPKs via dephosphorylation, in the cytoplasm and the nucleus. Some MKPs are more specific for ERKs, others for JNK or p38MAPK.

References

Farooq A & Zhou MM (2004). Structure and regulation of MAPK phosphatases. Cell Signal, 16, 769-79. [🔗](#)

Siwak D, Jacob-Hirsch J, Lu Y, Amit I, Tarcic G, Segal E, ... Citri A (2007). A module of negative feedback regulators defines growth factor signaling. Nat Genet, 39, 503-12. [🔗](#)

Edit history

| Date       | Action   | Author    |
|------------|----------|-----------|
| 2007-11-08 | Reviewed | Greene LA |
| 2007-11-08 | Created  | Jassal B  |
| 2023-11-28 | Modified | Wright A  |

1 submitted entities found in this pathway, mapping to 1 Reactome entities

| Input  | UniProt Id |
|--------|------------|
| PPP2CB | P62714     |





24. Abasic sugar-phosphate removal via the single-nucleotide replacement pathway (R-HSA-73930)

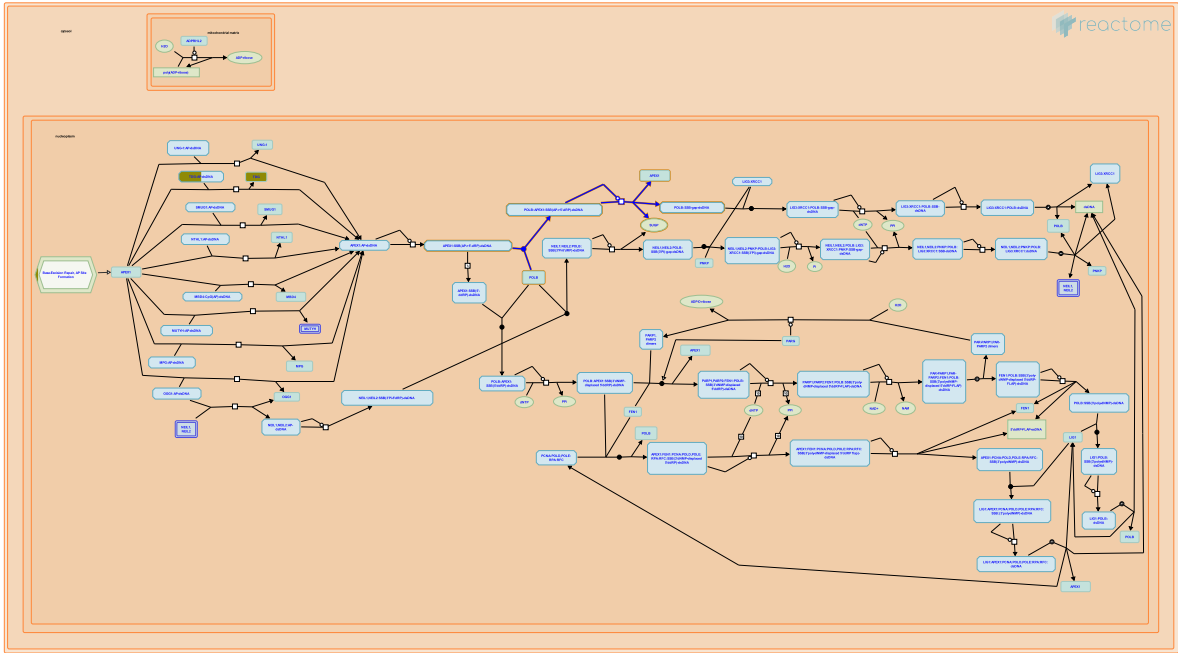

**Cellular compartments:** nucleoplasm.

Abasic sugar phosphate removal via the single nucleotide replacement pathway requires displacement of DNA glycosylase by APEX1, APEX1-mediated endonucleolytic cleavage at the 5' side of the base free deoxyribose residue, recruitment of POLB to the AP site and excision of the abasic sugar phosphate (5'dRP) residue at the strand break (Lindahl and Wood, 1999).

**References**

Lindahl T & Wood RD (1999). Quality control by DNA repair. *Science*, 286, 1897-905.

**Edit history**

| Date       | Action   | Author          |
|------------|----------|-----------------|
| 2004-01-29 | Created  | Matthews L      |
| 2004-02-03 | Edited   | Matthews L      |
| 2004-02-03 | Authored | Matthews L      |
| 2014-12-04 | Revised  | Orlic-Milacic M |
| 2014-12-04 | Edited   | Orlic-Milacic M |
| 2014-12-22 | Reviewed | Borowiec JA     |
| 2023-11-16 | Modified | Wright A        |

**Interactors found in this pathway (1)**

| Input | UniProt Id | Interacts with | Input | UniProt Id | Interacts with |
|-------|------------|----------------|-------|------------|----------------|
| EP300 | Q09472     | P27695         |       |            |                |

## 25. MASTL Facilitates Mitotic Progression (R-HSA-2465910)

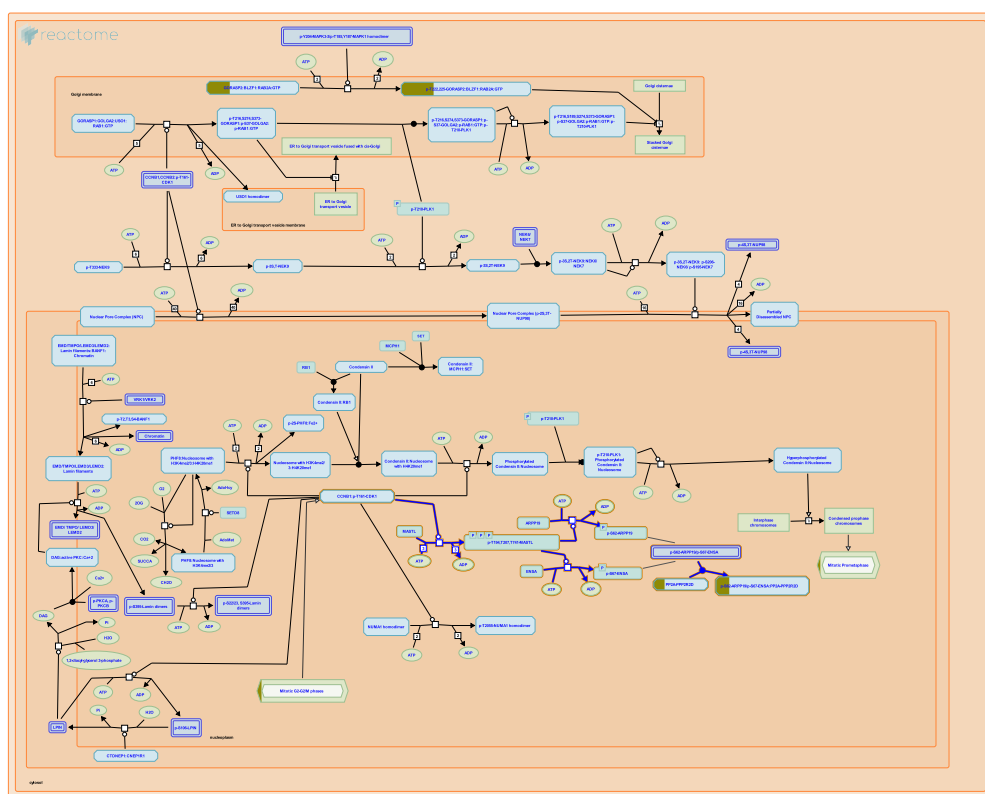

**Cellular compartments:** nucleoplasm.

The activity of MASTL, also known as the Greatwall kinase (GWL), is necessary for the entry and progression of mitosis. MASTL is activated by phosphorylation of several key residues during mitotic entry. Phosphorylation on the serine residue S875 (S883 in *Xenopus*), likely through autophosphorylation (Blake-Hodek et al. 2012) appears to be critical (Vigneron et al. 2011). Several other sites, including putative CDK1 targets T194, T207 and T741, contribute to the full activation of MASTL (Yu et al. 2006, Blake-Hodek et al. 2012). Other kinases, such as PLK1 (Vigneron et al. 2011) and other MASTL phosphorylation sites may also be functionally important (Yu et al. 2006, Blake-Hodek et al. 2012).

Activated MASTL phosphorylates ARPP19 and ENSA on serines S62 and S67, respectively, enabling them to bind to and inhibit the phosphatase activity of PP2A complexed with the regulatory subunit PPP2R2D (B55-delta). Inhibition of PP2A-PPP2R2D activity by ARPP19 or ENSA prevents dephosphorylation of CDK1 targets, hence allowing entry and maintenance of mitosis (Mochida et al. 2010, Gharbi-Ayachi et al. 2010, Burgess et al. 2010).

## References

- Skehel M, Mochida S, Hunt T & Maslen SL (2010). Greatwall phosphorylates an inhibitor of protein phosphatase 2A that is essential for mitosis. *Science*, 330, 1670-3. [🔗](#)
- Yu J, Li Z, Goldberg ML, Galas S & Zhao Y (2006). Greatwall kinase participates in the Cdc2 autoregulatory loop in *Xenopus* egg extracts. *Mol. Cell*, 22, 83-91. [🔗](#)
- Lorca T, Burgess A, Van-Dorsselaer A, Vigneron S, Strub JM, Gharbi-Ayachi A, ... Labbe JC (2010). The substrate of Greatwall kinase, Arpp19, controls mitosis by inhibiting protein phosphatase 2A. *Science*, 330, 1673-7. [🔗](#)

Lorca T, Burgess A, Vigneron S, Raymond AA, Gharbi-Ayachi A, Castro A, ... Labbe JC (2011). Characterization of the mechanisms controlling Greatwall activity. *Mol. Cell. Biol.*, 31, 2262-75. [↗](#)

Chen W, Castilho PV, Williams BC, Mao Y, Goldberg ML, Blake-Hodek KA, ... Zhao Y (2012). Determinants for activation of the atypical AGC kinase Greatwall during M phase entry. *Mol. Cell. Biol.*, 32, 1337-53. [↗](#)

### Edit history

| Date       | Action   | Author          |
|------------|----------|-----------------|
| 2012-09-04 | Authored | Orlic-Milacic M |
| 2012-09-04 | Created  | Orlic-Milacic M |
| 2012-09-14 | Edited   | Gillespie ME    |
| 2012-09-26 | Reviewed | Mochida S       |
| 2012-09-28 | Reviewed | Burgess A       |
| 2023-11-17 | Modified | Wright A        |

**1 submitted entities found in this pathway, mapping to 1 Reactome entities**

| Input  | UniProt Id |
|--------|------------|
| PPP2CB | P62714     |

## 6. Identifiers found

Below is a list of the input identifiers that have been found or mapped to an equivalent element in Reactome, classified by resource.

### 65 of the submitted entities were found, mapping to 75 Reactome entities

| Input    | UniProt Id | Input   | UniProt Id     | Input    | UniProt Id |
|----------|------------|---------|----------------|----------|------------|
| ACVR2A   | P27037     | ANKRD44 | Q9H672         | AP3B1    | O00203     |
| APBA2    | Q99767     | APLN    | Q9ULZ1         | ATP1A1   | P05023     |
| B3GALNT1 | O75752     | B4GALT2 | O60909         | BCO2     | Q9BYV7     |
| BIN2     | Q9UBW5     | CCNT2   | O60583         | CDH2     | P19022     |
| COPS7A   | Q9UBW8     | COQ10B  | Q9H8M1         | COX7A2L  | O14548     |
| CSTF3    | Q12996     | CTCF    | P49711         | DHFR     | P00374     |
| DIAPH1   | O60610     | EP300   | Q09472         | EZH2     | Q15910     |
| FLRT3    | Q9NZU0     | FOXG1   | P55316         | FUT8     | Q9BYC5     |
| GAD1     | Q99259     | HIBADH  | P31937         | IL1RAPL1 | Q9NZN1     |
| KHDRBS3  | O75525     | KRT83   | P78385, Q14533 | LPAR4    | Q99677     |
| MED14    | O60244     | MIS12   | Q9H081         | PHAX     | Q9H814     |
| PKP4     | Q99569     | PPP2CB  | P62714         | PRKCQ    | Q04759     |
| RAB2A    | P61019     | RAC1    | P63000         | RB1CC1   | Q8TDY2     |
| RBM4     | Q9BWF3     | RHOB    | P62745         | RICTOR   | Q6R327     |
| SEN3     | Q9H4L4     | SLC19A2 | O60779         | SLC39A6  | Q13433     |
| SLITRK3  | O94933     | SMNDC1  | O75940         | SOAT1    | P35610     |
| SOCS2    | O14508     | SPCS3   | P61009         | TDG      | Q13569     |
| TFG      | Q92734     | THSD7B  | Q9C0I4         | TRAIP    | Q9BWF2     |
| TYMS     | P04818     | UBQLN2  | Q9UHD9         | USP34    | Q70CQ2     |
| UTY      | O14607     | VCAN    | P13611         | VIM      | P08670     |
| WIF1     | Q9Y5W5     | WNK1    | Q9H4A3         | ZDHHC21  | Q8IVQ6     |
| ZFH3     | Q15911     | ZNF131  | P52739         |          |            |

  

| Input | Ensembl Id      | Input | Ensembl Id      | Input | Ensembl Id      |
|-------|-----------------|-------|-----------------|-------|-----------------|
| DHFR  | ENSG00000228716 | EZH2  | ENSG00000106462 | GAD1  | ENSG00000128683 |
| PRKCQ | ENSG0000065675  | SOCS2 | ENSG00000120833 | TYMS  | ENSG00000176890 |
| VIM   | ENSG0000026025  |       |                 |       |                 |

### Interactors (78)

| Input  | UniProt Id                 | Interacts with | Input   | UniProt Id | Interacts with |
|--------|----------------------------|----------------|---------|------------|----------------|
| ANKHD1 | Q8IWZ3-3                   | Q92993         | ANKRD44 | Q8N8A2     | O00308         |
| AP3B1  | O00203                     | P0DTC4         | APBA2   | O35431     | P05067-4       |
| APLN   | D3DTF8                     | P06396         | ARFGEF1 | Q9Y6D6     | P19338         |
| ATP1A1 | P05023                     | P0DTC4         | BLCAP   | P62952     | O95237         |
| CA11   | Q9NS71                     | Q53GS7         | CADPS   | A2RRN7     | Q15436         |
| CCNT2  | O60583-1, O60583-2, O60583 | P50750         | CDH2    | P19022     | P35222         |
| COPS7A | Q9UBW8                     | Q92466         | CSTF3   | Q12996     | Q6P1J9         |
| CTCF   | P49711                     | Q00341         | DDX50   | Q9BQ39     | P03372         |
| DIAPH1 | O60610                     | P49593         | EP300   | Q09472     | P27695         |
| EZH2   | Q15910                     | P46100         | FLRT3   | Q9NZU0     | P05067-4       |

| Input   | UniProt Id | Interacts with | Input   | UniProt Id | Interacts with |
|---------|------------|----------------|---------|------------|----------------|
| FOXG1   | Q60987     | O43524         | FUT8    | Q9BYC5     | P04578         |
| GAD1    | Q99259     | Q13188         | HIBADH  | P31937     | P63027         |
| IER5    | Q5VY09     | Q00613         | KHDRBS3 | O75525     | Q8WX92         |
| KRT83   | P78385     | Q12837         | MAP4K3  | Q8IVH8     | Q13094         |
| MED14   | O60244     | Q15648         | MIS12   | Q9H081     | O60566         |
| MYO1E   | Q12965     | P50570         | OLIG3   | Q7RTU3     | Q08117         |
| OTP     | Q5XKR4     | O43924         | PABPC4  | Q13310     | Q8WV24         |
| PAWR    | Q96IZ0     | Q01094         | PHAX    | Q9H814     | P52298, Q09161 |
| PID1    | Q7Z2X4     | Q8N9N5         | PKP4    | Q99569     | Q96RT1         |
| PPP1R3D | O95685     | P62136         | PPP2CB  | P62714     | Q86XL3         |
| PRKCQ   | Q04759     | Q06187         | RAB2A   | P61019     | Q96FJ0         |
| RAC1    | P63000     | P52306         | RB1CC1  | Q8TDY2     | O75385         |
| RBM4    | Q9BWF3-1   | Q99814         | RICTOR  | Q6R327     | Q13418         |
| SAMD4A  | Q9UPU9     | P31946         | SENP3   | Q9H4L4     | Q8IZL8         |
| SH3RF3  | Q8TEJ3     | Q13177         | SLC39A6 | Q13433-2   | Q3KNW5         |
| SLITRK3 | O94933     | O76024         | SLMAP   | Q14BN4     | Q9BRV8         |
| SOAT1   | P35610     | P27824         | SOCS2   | O14508     | Q15369, Q93034 |
| SPCS3   | P61009     | P42858         | TDG     | Q13569     | Q15788         |
| TFG     | Q92734     | Q8TDS5         | THSD7B  | Q9C0I4     | Q3SXY8         |
| TLK2    | Q86UE8     | Q92985         | TMEM165 | Q9HC07     | P13569         |
| TMEM60  | Q9H2L4     | Q9UBD6         | TRAIP   | Q9BWF2     | O15160         |
| TRIP13  | Q15645     | P07902         | TYMS    | P04818     | P19320         |
| UBQLN2  | Q9UHD9     | Q9UNW1         | USP34   | Q70CQ2     | P48729         |
| UTY     | O14607     | Q14686         | VCAN    | P13611     | P14780         |
| VIM     | P08670     | O60437         | WDR44   | Q5JSH3     | P16284         |
| WIF1    | Q9Y5W5     | P78560         | WNK1    | Q9H4A3     | Q15149         |
| YTHDF1  | Q9BYJ9     | Q9Y5J3         | ZBTB4   | Q9P1Z0     | Q08379         |
| ZDHHC21 | Q8IVQ6     | Q96E29         | ZFHX3   | Q15911-2   | O14503         |
| ZNF131  | P52739-2   | Q14192         | ZNF536  | O15090     | P48431         |
| Input   | ChEBI Id   | Interacts with | Input   | ChEBI Id   | Interacts with |
| RAC1    | P63000     | 15996          |         |            |                |

# 7. Identifiers not found

These 18 identifiers were not found neither mapped to any entity in Reactome.

|         |        |       |        |        |        |        |         |
|---------|--------|-------|--------|--------|--------|--------|---------|
| AGAP1   | ARL5A  | CBLN4 | EFCAB5 | EHBP1  | FBXO47 | FRMD4B | GOLGA6B |
| GPR22   | KBTBD2 | MYPN  | PCDH9  | PRDM13 | SALL3  | SAMD13 | SLC35F3 |
| STAG3L4 | TAPBPL |       |        |        |        |        |         |
