# Supplementary material for: Differential circulating miRNA profiles identified miR-423-5p, miR-93-5p, and miR-4532 as potential biomarkers for cholangiocarcinoma diagnosis
Source: PeerJ. 2024 Dec 10;12:e18367. doi: 10.7717/peerj.18367 (PMC11639864; doi:10.7717/peerj.18367)
Supplement: Supplemental Information 1 — List and count number of the identified miRNA by nCounter SPRINT profiler. [file peerj-12-18367-s001.xlsx]

## Sheet: Raw data
miRNAs/Groups	HC R1	HC R2	HC R3	HC MAX	OV R1	OV R2	OV R3	OV MAX	CCA R1	CCA R2	CCA R3	CCA MAX
hsa-miR-3605-5p	6.95	2.44	26.91	26.91	16.65	1.14	1	16.65	16.15	5.61	1	16.15
hsa-miR-1295a	25.55	22.26	18.58	25.55	1.38	14.56	6.58	14.56	13.22	9.95	1	13.22
hsa-miR-34c-3p	16.25	13.25	1.67	16.25	13.38	33.87	7.49	33.87	7.37	13.42	1	13.42
hsa-miR-548m	26.48	15.95	30.24	30.24	11.2	22.51	1.15	22.51	14.2	13.42	1	14.2
hsa-miR-497-5p	18.11	5.14	25.24	25.24	9.01	17.97	6.58	17.97	10.3	15.16	1	15.16
hsa-miR-3131	28.34	19.56	10.26	28.34	13.38	5.47	30.15	30.15	12.25	16.89	1	16.89
hsa-miR-486-3p	23.69	18.65	10.26	23.69	15.56	16.83	3.87	16.83	24.93	17.76	1	24.93
hsa-miR-378d	14.39	26.76	1.67	26.76	19.92	14.56	11.12	19.92	6.39	1	1.78	6.39
hsa-miR-2053	13.46	32.17	1.93	32.17	16.65	14.56	12.02	16.65	14.2	7.35	2.63	14.2
hsa-miR-595	27.41	17.75	10.26	27.41	10.1	8.88	17.46	17.46	1.52	9.95	2.63	9.95
hsa-miR-96-5p	43.22	21.36	26.91	43.22	28.65	32.74	25.62	32.74	25.91	27.31	2.63	27.31
hsa-miR-425-5p	16.25	8.74	1.67	16.25	5.74	15.7	5.68	15.7	11.27	35.98	2.63	35.98
hsa-miR-3065-3p	27.41	6.94	5.26	27.41	6.83	4.34	7.49	7.49	13.22	6.48	3.48	13.22
hsa-miR-922	16.25	4.24	28.57	28.57	3.56	1.14	10.21	10.21	4.44	9.95	3.48	9.95
hsa-miR-190b	40.43	37.58	21.91	40.43	34.1	12.29	23.8	34.1	14.2	9.95	3.48	14.2
hsa-miR-548b-3p	31.13	13.25	1.67	31.13	4.65	2.07	11.12	11.12	20.05	13.42	3.48	20.05
hsa-miR-1180-3p	14.39	1	26.91	26.91	6.83	8.88	18.37	18.37	17.13	9.08	4.32	17.13
hsa-miR-144-3p	6.95	7.84	3.59	7.84	10.1	32.74	2.05	32.74	18.1	13.42	4.32	18.1
hsa-miR-520a-5p	16.25	12.35	38.56	38.56	7.92	1.14	13.83	13.83	19.08	14.29	4.32	19.08
hsa-miR-1915-3p	24.62	13.25	3.59	24.62	5.74	1.14	1	5.74	30.79	16.02	4.32	30.79
hsa-miR-1286	12.53	18.65	8.59	18.65	17.74	11.15	5.68	17.74	27.86	20.36	4.32	27.86
hsa-miR-342-3p	24.62	6.04	1.67	24.62	27.56	46.37	7.49	46.37	20.05	27.31	4.32	27.31
hsa-miR-361-5p	16.25	16.85	5.26	16.85	19.92	37.28	13.83	37.28	37.62	37.72	4.32	37.72
hsa-miR-129-2-3p	25.55	23.16	20.25	25.55	2.47	4.34	10.21	10.21	5.42	2.14	6.01	6.01
hsa-miR-219a-2-3p	18.11	20.46	8.59	20.46	9.01	7.75	32.86	32.86	12.25	7.35	6.01	12.25
hsa-miR-1972	37.64	19.56	11.92	37.64	7.92	23.65	18.37	23.65	18.1	14.29	6.01	18.1
hsa-miR-1271-5p	21.83	25.86	1.93	25.86	17.74	15.7	15.65	17.74	14.2	16.02	6.01	16.02
hsa-miR-423-3p	25.55	16.85	1.67	25.55	21.01	20.24	16.55	21.01	44.45	16.89	6.01	44.45
hsa-miR-10a-5p	15.32	17.75	25.24	25.24	13.38	23.65	8.4	23.65	6.39	3.88	6.86	6.86
hsa-miR-1261	34.85	21.36	1.93	34.85	16.65	12.29	22.9	22.9	27.86	14.29	6.86	27.86
hsa-miR-3130-3p	11.6	28.57	15.25	28.57	54.83	36.15	14.74	54.83	21.03	18.63	6.86	21.03
hsa-miR-325	24.62	22.26	13.59	24.62	17.74	15.7	14.74	17.74	20.05	20.36	6.86	20.36
hsa-miR-887-5p	18.11	19.56	25.24	25.24	13.38	16.83	24.71	24.71	22.01	8.21	7.7	22.01
hsa-miR-30c-5p	32.06	18.65	16.92	32.06	11.2	1.14	22.9	22.9	8.35	12.55	7.7	12.55
hsa-miR-643	28.34	24.06	30.24	30.24	13.38	21.38	33.77	33.77	21.03	14.29	7.7	21.03
hsa-miR-615-3p	26.48	15.05	30.24	30.24	23.2	23.65	20.18	23.65	21.03	16.02	7.7	21.03
hsa-miR-210-3p	13.46	15.95	33.57	33.57	4.65	14.56	7.49	14.56	21.03	16.89	7.7	21.03
hsa-miR-328-5p	27.41	13.25	15.25	27.41	23.2	17.97	9.3	23.2	24.93	18.63	7.7	24.93
hsa-miR-331-3p	22.76	13.25	6.92	22.76	16.65	11.15	12.93	16.65	28.84	24.7	7.7	28.84
hsa-miR-519b-3p	11.6	14.15	6.92	14.15	4.65	5.47	12.02	12.02	12.25	30.78	7.7	30.78
hsa-miR-15b-5p	32.06	21.36	11.92	32.06	19.92	83.86	13.83	83.86	28.84	37.72	7.7	37.72
hsa-miR-147b	37.64	21.36	23.58	37.64	19.92	19.11	15.65	19.92	15.18	8.21	8.55	15.18
hsa-miR-4707-3p	22.76	24.96	1.93	24.96	13.38	15.7	10.21	15.7	17.13	13.42	8.55	17.13
hsa-miR-370-5p	22.76	24.96	1.67	24.96	9.01	12.29	14.74	14.74	19.08	15.16	8.55	19.08
hsa-miR-3934-5p	27.41	17.75	11.92	27.41	18.83	5.47	19.27	19.27	18.1	18.63	8.55	18.63
hsa-miR-421	37.64	30.37	26.91	37.64	18.83	28.19	36.49	36.49	27.86	23.83	8.55	27.86
hsa-miR-372-3p	13.46	18.65	6.92	18.65	15.56	4.34	14.74	15.56	25.91	3.88	9.39	25.91
hsa-miR-1185-1-3p	24.62	21.36	6.92	24.62	13.38	11.15	11.12	13.38	24.93	8.21	9.39	24.93
hsa-miR-526a+hsa-miR-518c-5p+hsa-miR-518d-5p	29.27	20.46	10.26	29.27	31.92	6.61	21.08	31.92	11.27	15.16	9.39	15.16
hsa-miR-937-3p	19.04	14.15	13.59	19.04	26.47	24.79	21.08	26.47	19.08	15.16	9.39	19.08
hsa-miR-1268b	44.15	14.15	33.57	44.15	22.1	21.38	12.93	22.1	27.86	17.76	9.39	27.86
hsa-miR-1973	17.18	33.97	26.91	33.97	15.56	8.88	25.62	25.62	8.35	20.36	9.39	20.36
hsa-miR-339-5p	17.18	13.25	41.89	41.89	6.83	1.14	3.87	6.83	13.22	1	10.24	13.22
hsa-miR-216a-5p	30.2	19.56	3.59	30.2	2.47	21.38	12.02	21.38	13.22	8.21	10.24	13.22
hsa-miR-4421	9.74	16.85	8.59	16.85	11.2	24.79	29.24	29.24	22.01	12.55	10.24	22.01
hsa-miR-140-5p	17.18	6.94	3.59	17.18	7.92	1.14	2.05	7.92	25.91	13.42	10.24	25.91
hsa-miR-885-5p	16.25	10.54	25.24	25.24	9.01	8.88	6.58	9.01	21.03	16.02	10.24	21.03
hsa-miR-664a-3p	19.97	28.57	15.25	28.57	10.1	16.83	17.46	17.46	14.2	22.1	10.24	22.1
hsa-miR-4532	3.23	1	1.67	3.23	3.56	1.14	8.4	8.4	47.37	39.45	10.24	47.37
hsa-miR-493-3p	10.67	15.05	20.25	20.25	1.09	31.6	15.65	31.6	23.96	1	11.09	23.96
hsa-miR-608	21.83	24.96	16.92	24.96	1.09	4.34	17.46	17.46	14.2	5.61	11.09	14.2
hsa-miR-135b-5p	32.06	24.06	20.25	32.06	28.65	5.47	19.27	28.65	9.32	6.48	11.09	11.09
hsa-miR-192-5p	35.78	24.06	18.58	35.78	9.01	21.38	17.46	21.38	8.35	22.97	11.09	22.97
hsa-miR-1287-5p	23.69	30.37	15.25	30.37	6.83	16.83	25.62	25.62	8.35	25.57	11.09	25.57
hsa-miR-22-3p	12.53	42.08	1.93	42.08	1.09	86.13	4.77	86.13	55.18	48.13	11.09	55.18
hsa-miR-485-3p	12.53	27.66	16.92	27.66	19.92	12.29	13.83	19.92	27.86	14.29	11.93	27.86
hsa-miR-518c-3p	16.25	13.25	1.67	16.25	25.38	7.75	21.99	25.38	10.3	17.76	11.93	17.76
hsa-miR-548o-3p+hsa-miR-548ah-3p+hsa-miR-548av-3p	12.53	18.65	23.58	23.58	27.56	6.61	8.4	27.56	21.03	20.36	11.93	21.03
hsa-miR-329-5p	24.62	10.54	11.92	24.62	23.2	19.11	12.02	23.2	17.13	7.35	12.78	17.13
hsa-miR-205-5p	24.62	3.34	13.59	24.62	7.92	23.65	16.55	23.65	11.27	10.82	12.78	12.78
hsa-miR-30b-5p	11.6	10.54	5.26	11.6	9.01	5.47	12.02	12.02	28.84	11.69	12.78	28.84
hsa-miR-374a-3p	29.27	4.24	15.25	29.27	11.2	7.75	12.02	12.02	23.96	13.42	12.78	23.96
hsa-miR-624-3p	21.83	20.46	8.59	21.83	16.65	1.14	2.96	16.65	25.91	13.42	12.78	25.91
hsa-miR-548k	16.25	31.27	36.9	36.9	17.74	19.11	10.21	19.11	29.81	16.02	12.78	29.81
hsa-miR-150-5p	23.69	1	50.22	50.22	31.92	42.96	7.49	42.96	5.42	16.89	12.78	16.89
hsa-miR-3180	24.62	10.54	1.67	24.62	10.1	4.34	19.27	19.27	17.13	18.63	12.78	18.63
hsa-miR-1272	30.2	36.68	31.9	36.68	26.47	42.96	32.86	42.96	29.81	24.7	12.78	29.81
hsa-miR-28-5p	42.29	27.66	5.26	42.29	23.2	31.6	22.9	31.6	38.59	27.31	12.78	38.59
hsa-miR-626	17.18	25.86	5.26	25.86	13.38	23.65	23.8	23.8	44.45	32.51	12.78	44.45
hsa-miR-1197	20.9	26.76	30.24	30.24	23.2	21.38	22.9	23.2	23.96	11.69	13.62	23.96
hsa-miR-19a-3p	4.16	1.53	3.59	4.16	11.2	47.51	1	47.51	12.25	16.02	13.62	16.02
hsa-miR-197-5p	33.92	28.57	40.23	40.23	15.56	24.79	20.18	24.79	17.13	16.89	13.62	17.13
hsa-miR-218-5p	33.92	21.36	20.25	33.92	17.74	12.29	19.27	19.27	22.98	17.76	13.62	22.98
hsa-miR-1234-3p	28.34	27.66	23.58	28.34	29.74	36.15	21.08	36.15	15.18	19.5	13.62	19.5
hsa-miR-744-5p	18.11	16.85	23.58	23.58	13.38	27.06	12.02	27.06	20.05	21.23	13.62	21.23
hsa-miR-138-5p	21.83	26.76	6.92	26.76	19.92	22.51	22.9	22.9	22.98	21.23	13.62	22.98
hsa-miR-146a-5p	16.25	12.35	1.67	16.25	9.01	37.28	13.83	37.28	21.03	31.64	13.62	31.64
hsa-miR-1236-3p	32.06	32.17	18.58	32.17	12.29	19.11	31.05	31.05	27.86	33.38	13.62	33.38
hsa-miR-378b	21.83	26.76	5.26	26.76	13.38	16.83	15.65	16.83	22.98	5.61	14.47	22.98
hsa-miR-3168	18.11	3.34	26.91	26.91	1.09	23.65	14.74	23.65	19.08	8.21	14.47	19.08
hsa-miR-629-5p	25.55	28.57	18.58	28.57	18.83	11.15	17.46	18.83	33.71	23.83	14.47	33.71
hsa-miR-3613-3p	32.06	36.68	43.56	43.56	29.74	24.79	14.74	29.74	27.86	24.7	14.47	27.86
hsa-miR-1306-3p	34.85	31.27	10.26	34.85	24.29	25.92	17.46	25.92	42.5	33.38	14.47	42.5
hsa-miR-146b-5p	33.92	37.58	45.23	45.23	36.29	30.47	38.3	38.3	61.03	37.72	14.47	61.03
hsa-let-7f-5p	35.78	33.97	50.22	50.22	16.65	24.79	14.74	24.79	34.69	43.79	14.47	43.79
hsa-miR-892a	25.55	14.15	8.59	25.55	1.09	1.14	20.18	20.18	1	1.27	15.31	15.31
hsa-miR-103a-3p	27.41	19.56	16.92	27.41	34.1	13.43	6.58	34.1	30.79	13.42	15.31	30.79
hsa-miR-548d-5p	22.76	25.86	1.67	25.86	9.01	14.56	24.71	24.71	43.47	16.02	15.31	43.47
hsa-miR-582-5p	26.48	17.75	25.24	26.48	13.38	11.15	12.93	13.38	13.22	17.76	15.31	17.76
hsa-miR-936	34.85	13.25	1.67	34.85	11.2	7.75	10.21	11.2	24.93	17.76	15.31	24.93
hsa-miR-1270	33.92	25.86	3.59	33.92	30.83	20.24	26.52	30.83	24.93	18.63	15.31	24.93
hsa-miR-548l	19.97	27.66	1.67	27.66	9.01	4.34	19.27	19.27	11.27	20.36	15.31	20.36
hsa-miR-127-3p	37.64	21.36	5.26	37.64	12.29	22.51	23.8	23.8	15.18	20.36	15.31	20.36
hsa-miR-1277-3p	67.4	49.29	1.67	67.4	37.38	33.87	48.27	48.27	28.84	22.1	15.31	28.84
hsa-miR-939-5p	40.43	31.27	35.23	40.43	21.01	11.15	25.62	25.62	32.74	23.83	15.31	32.74
hsa-miR-346	33.92	23.16	11.92	33.92	15.56	42.96	16.55	42.96	33.71	24.7	15.31	33.71
hsa-miR-1296-3p	20.9	16.85	30.24	30.24	27.56	23.65	14.74	27.56	17.13	25.57	15.31	25.57
hsa-miR-106a-5p+hsa-miR-17-5p	20.9	1	3.59	20.9	9.01	62.27	1	62.27	37.62	55.94	15.31	55.94
hsa-miR-320a	33.92	25.86	21.91	33.92	16.65	23.65	24.71	24.71	21.03	8.21	16.16	21.03
hsa-miR-181b-2-3p	28.34	13.25	15.25	28.34	4.65	17.97	15.65	17.97	25.91	11.69	16.16	25.91
hsa-miR-365a-3p+hsa-miR-365b-3p	49.73	40.28	21.91	49.73	21.01	28.19	16.55	28.19	21.03	22.1	16.16	22.1
hsa-miR-432-5p	31.13	18.65	11.92	31.13	17.74	11.15	12.02	17.74	24.93	25.57	16.16	25.57
hsa-miR-182-3p	23.69	32.17	8.59	32.17	12.29	13.43	16.55	16.55	5.42	29.04	16.16	29.04
hsa-miR-584-5p	35.78	48.39	25.24	48.39	28.65	28.19	25.62	28.65	34.69	29.91	16.16	34.69
hsa-miR-6721-5p	39.5	46.59	1.67	46.59	27.56	45.23	19.27	45.23	32.74	35.12	16.16	35.12
hsa-miR-450a-2-3p	42.29	21.36	55.22	55.22	22.1	47.51	23.8	47.51	32.74	35.12	16.16	35.12
hsa-miR-498	23.69	35.77	31.9	35.77	18.83	24.79	40.11	40.11	52.25	35.12	16.16	52.25
hsa-miR-628-3p	27.41	35.77	6.92	35.77	16.65	15.7	21.08	21.08	21.03	9.95	17	21.03
hsa-miR-378g	12.53	19.56	21.91	21.91	15.56	7.75	8.4	15.56	24.93	10.82	17	24.93
hsa-miR-579-5p	21.83	14.15	8.59	21.83	14.47	27.06	3.87	27.06	19.08	13.42	17	19.08
hsa-miR-198	16.25	20.46	6.92	20.46	21.01	36.15	36.49	36.49	11.27	18.63	17	18.63
hsa-miR-324-3p	33.92	31.27	46.89	46.89	30.83	38.42	23.8	38.42	44.45	23.83	17	44.45
hsa-miR-298	34.85	19.56	15.25	34.85	14.47	24.79	27.43	27.43	20.05	25.57	17	25.57
hsa-miR-125b-5p	28.34	12.35	20.25	28.34	15.56	13.43	11.12	15.56	29.81	29.04	17	29.81
hsa-miR-514a-3p	31.13	36.68	20.25	36.68	15.56	13.43	13.83	15.56	25.91	29.91	17	29.91
hsa-miR-224-5p	16.25	18.65	11.92	18.65	21.01	40.69	27.43	40.69	16.15	16.02	17.85	17.85
hsa-miR-648	34.85	30.37	26.91	34.85	16.65	25.92	14.74	25.92	20.05	16.02	17.85	20.05
hsa-miR-99b-5p	25.55	13.25	1.67	25.55	34.1	19.11	21.08	34.1	36.64	19.5	17.85	36.64
hsa-miR-519c-3p	37.64	21.36	43.56	43.56	27.56	33.87	17.46	33.87	18.1	28.17	17.85	28.17
hsa-miR-1304-5p	44.15	56.5	26.91	56.5	29.74	13.43	34.68	34.68	25.91	29.91	17.85	29.91
hsa-miR-543	28.34	34.87	25.24	34.87	22.1	13.43	35.58	35.58	35.67	31.64	17.85	35.67
hsa-miR-149-5p	46.01	39.38	31.9	46.01	58.1	42.96	35.58	58.1	46.4	34.25	17.85	46.4
hsa-miR-381-5p	18.11	24.96	18.58	24.96	11.2	5.47	21.99	21.99	8.35	35.98	17.85	35.98
hsa-miR-502-5p	70.19	44.78	43.56	70.19	19.92	31.6	48.27	48.27	1	7.35	18.7	18.7
hsa-miR-4707-5p	37.64	16.85	26.91	37.64	23.2	20.24	23.8	23.8	19.08	20.36	18.7	20.36
hsa-miR-506-5p	37.64	26.76	11.92	37.64	29.74	27.06	22.9	29.74	33.71	22.97	18.7	33.71
hsa-miR-340-5p	39.5	33.97	25.24	39.5	37.38	69.09	25.62	69.09	23.96	26.44	18.7	26.44
hsa-miR-382-3p	12.53	18.65	1.93	18.65	15.56	13.43	29.24	29.24	16.15	27.31	18.7	27.31
hsa-miR-889-3p	39.5	24.06	28.57	39.5	30.83	13.43	21.99	30.83	11.27	28.17	18.7	28.17
hsa-miR-890	26.48	30.37	1.67	30.37	47.19	21.38	21.99	47.19	12.25	31.64	18.7	31.64
hsa-miR-30a-3p	35.78	18.65	20.25	35.78	17.74	28.19	23.8	28.19	17.13	36.85	18.7	36.85
hsa-miR-495-5p	60.89	51.09	11.92	60.89	36.29	25.92	25.62	36.29	37.62	41.19	18.7	41.19
hsa-miR-24-3p	10.67	1	8.59	10.67	15.56	35.01	6.58	35.01	39.57	46.4	18.7	46.4
hsa-miR-185-5p	7.88	15.05	33.57	33.57	21.01	111.12	11.12	111.12	38.59	52.47	18.7	52.47
hsa-miR-3151-5p	23.69	19.56	3.59	23.69	21.01	22.51	24.71	24.71	28.84	8.21	19.54	28.84
hsa-miR-6724-5p	20.9	25.86	18.58	25.86	6.83	16.83	20.18	20.18	25.91	16.89	19.54	25.91
hsa-miR-199b-5p	23.69	20.46	41.89	41.89	25.38	31.6	23.8	31.6	24.93	21.23	19.54	24.93
hsa-miR-376c-3p	39.5	25.86	15.25	39.5	15.56	45.23	33.77	45.23	33.71	23.83	19.54	33.71
hsa-miR-4451	27.41	29.47	28.57	29.47	24.29	38.42	28.33	38.42	32.74	28.17	19.54	32.74
hsa-miR-640	5.09	13.25	38.56	38.56	18.83	21.38	14.74	21.38	22.01	5.61	20.39	22.01
hsa-miR-4286	7.88	19.56	33.57	33.57	23.2	49.78	20.18	49.78	20.05	15.16	20.39	20.39
hsa-miR-503-5p	40.43	17.75	11.92	40.43	18.83	29.33	16.55	29.33	20.05	16.02	20.39	20.39
hsa-miR-582-3p	37.64	35.77	25.24	37.64	40.65	14.56	27.43	40.65	38.59	24.7	20.39	38.59
hsa-miR-892b	62.75	27.66	8.59	62.75	24.29	23.65	15.65	24.29	21.03	31.64	20.39	31.64
hsa-miR-642a-3p	13.46	22.26	1.67	22.26	23.2	19.11	15.65	23.2	29.81	6.48	21.23	29.81
hsa-miR-10b-5p	27.41	1	30.24	30.24	16.65	31.6	15.65	31.6	16.15	9.08	21.23	21.23
hsa-miR-5010-3p	19.97	20.46	28.57	28.57	21.01	14.56	22.9	22.9	19.08	17.76	21.23	21.23
hsa-miR-33a-5p	43.22	22.26	13.59	43.22	23.2	33.87	31.05	33.87	22.01	23.83	21.23	23.83
hsa-miR-147a	14.39	24.96	5.26	24.96	10.1	30.47	20.18	30.47	34.69	30.78	21.23	34.69
hsa-miR-1255b-5p	35.78	29.47	33.57	35.78	28.65	30.47	12.93	30.47	35.67	34.25	21.23	35.67
hsa-miR-556-3p	7.88	28.57	1.67	28.57	25.38	3.2	19.27	25.38	25.91	11.69	22.08	25.91
hsa-miR-548ad-3p	24.62	34.87	1.67	34.87	19.92	24.79	21.99	24.79	35.67	17.76	22.08	35.67
hsa-miR-1269a	42.29	47.49	6.92	47.49	29.74	32.74	31.05	32.74	22.98	22.97	22.08	22.98
hsa-miR-370-3p	31.13	23.16	36.9	36.9	25.38	10.02	11.12	25.38	16.15	26.44	22.08	26.44
hsa-miR-208b-3p	43.22	28.57	36.9	43.22	50.47	32.74	25.62	50.47	19.08	27.31	22.08	27.31
hsa-miR-1302	61.82	96.14	31.9	96.14	36.29	33.87	49.18	49.18	39.57	29.91	22.08	39.57
hsa-miR-19b-3p	7.88	1	16.92	16.92	14.47	130.43	10.21	130.43	9.32	51.6	22.08	51.6
hsa-miR-484	30.2	15.95	26.91	30.2	42.83	29.33	31.96	42.83	81.52	92.39	22.08	92.39
hsa-miR-504-5p	24.62	22.26	16.92	24.62	18.83	33.87	9.3	33.87	31.76	17.76	22.92	31.76
hsa-miR-3202	30.2	37.58	23.58	37.58	26.47	19.11	30.15	30.15	39.57	20.36	22.92	39.57
hsa-miR-1298-5p	32.06	19.56	3.59	32.06	25.38	23.65	26.52	26.52	34.69	21.23	22.92	34.69
hsa-miR-449b-5p	23.69	21.36	33.57	33.57	13.38	24.79	22.9	24.79	22.98	23.83	22.92	23.83
hsa-miR-770-5p	31.13	29.47	13.59	31.13	23.2	21.38	29.24	29.24	21.03	28.17	22.92	28.17
hsa-miR-591	44.15	33.07	18.58	44.15	25.38	19.11	29.24	29.24	18.1	54.21	22.92	54.21
hsa-miR-568	19.97	28.57	41.89	41.89	10.1	13.43	21.99	21.99	28.84	16.89	23.77	28.84
hsa-miR-34a-5p	23.69	18.65	21.91	23.69	27.56	19.11	12.93	27.56	10.3	17.76	23.77	23.77
hsa-miR-499a-5p	21.83	35.77	1.67	35.77	16.65	24.79	13.83	24.79	10.3	19.5	23.77	23.77
hsa-miR-4461	32.99	19.56	25.24	32.99	22.1	21.38	28.33	28.33	23.96	22.97	23.77	23.96
hsa-miR-1183	26.48	33.07	1.67	33.07	22.1	24.79	21.08	24.79	37.62	22.97	23.77	37.62
hsa-miR-593-3p	39.5	44.78	46.89	46.89	40.65	14.56	32.86	40.65	47.37	23.83	23.77	47.37
hsa-miR-378i	49.73	40.28	65.21	65.21	35.19	41.83	33.77	41.83	39.57	28.17	23.77	39.57
hsa-miR-567	47.87	32.17	15.25	47.87	34.1	22.51	38.3	38.3	29.81	29.04	23.77	29.81
hsa-miR-410-3p	30.2	29.47	18.58	30.2	50.47	24.79	31.05	50.47	23.96	31.64	23.77	31.64
hsa-miR-509-5p	28.34	15.05	15.25	28.34	33.01	16.83	20.18	33.01	22.98	38.59	23.77	38.59
hsa-miR-573	62.75	47.49	60.21	62.75	34.1	42.96	46.46	46.46	52.25	51.6	23.77	52.25
hsa-let-7d-5p	14.39	19.56	1.67	19.56	11.2	1.14	2.96	11.2	10.3	17.76	24.61	24.61
hsa-miR-181a-3p	32.06	25.86	41.89	41.89	37.38	17.97	26.52	37.38	48.35	26.44	24.61	48.35
hsa-miR-1206	43.22	60.1	36.9	60.1	21.01	23.65	44.65	44.65	27.86	28.17	24.61	28.17
hsa-miR-371a-5p	81.35	50.19	35.23	81.35	55.92	40.69	61.86	61.86	55.18	34.25	24.61	55.18
hsa-miR-874-3p	39.5	16.85	18.58	39.5	26.47	25.92	21.99	26.47	32.74	68.09	24.61	68.09
hsa-miR-98-5p	20.9	10.54	1.93	20.9	33.01	31.6	17.46	33.01	22.01	23.83	25.46	25.46
hsa-miR-1258	49.73	46.59	23.58	49.73	35.19	31.6	23.8	35.19	29.81	24.7	25.46	29.81
hsa-miR-548e-5p	49.73	54.7	55.22	55.22	38.47	41.83	45.55	45.55	72.74	35.98	25.46	72.74
hsa-miR-151a-3p	38.57	62.81	16.92	62.81	66.83	45.23	43.74	66.83	49.33	36.85	25.46	49.33
hsa-miR-1307-5p	34.85	51.99	23.58	51.99	24.29	23.65	25.62	25.62	29.81	37.72	25.46	37.72
hsa-miR-1307-3p	37.64	28.57	13.59	37.64	22.1	31.6	21.99	31.6	28.84	23.83	26.31	28.84
hsa-miR-764	38.57	34.87	33.57	38.57	31.92	16.83	15.65	31.92	24.93	30.78	26.31	30.78
hsa-miR-511-5p	60.89	53.8	58.55	60.89	49.38	64.55	40.11	64.55	60.06	46.4	26.31	60.06
hsa-let-7g-5p	26.48	29.47	35.23	35.23	24.29	107.71	29.24	107.71	44.45	57.68	26.31	57.68
hsa-miR-181a-5p	77.63	58.3	33.57	77.63	46.1	56.59	36.49	56.59	50.3	63.75	26.31	63.75
hsa-miR-664b-3p	46.01	39.38	45.23	46.01	35.19	15.7	32.86	35.19	35.67	16.02	27.15	35.67
hsa-miR-300	44.15	33.07	11.92	44.15	31.92	32.74	13.83	32.74	5.42	23.83	27.15	27.15
hsa-miR-874-5p	19.97	16.85	26.91	26.91	24.29	27.06	19.27	27.06	22.01	28.17	27.15	28.17
hsa-miR-363-5p	40.43	36.68	21.91	40.43	17.74	7.75	19.27	19.27	25.91	29.04	27.15	29.04
hsa-miR-566	50.66	26.76	1.67	50.66	23.2	23.65	31.05	31.05	37.62	31.64	27.15	37.62
hsa-miR-625-5p	44.15	65.51	43.56	65.51	27.56	30.47	35.58	35.58	51.28	38.59	27.15	51.28
hsa-miR-137	55.31	103.35	61.88	103.35	42.83	64.55	59.14	64.55	51.28	40.32	27.15	51.28
hsa-miR-221-3p	27.41	6.94	5.26	27.41	21.01	39.55	13.83	39.55	47.37	65.49	27.15	65.49
hsa-miR-450a-5p	30.2	34.87	35.23	35.23	23.2	7.75	18.37	23.2	26.88	22.97	28	28
hsa-miR-592	29.27	51.99	21.91	51.99	26.47	31.6	15.65	31.6	29.81	22.97	28	29.81
hsa-miR-200c-3p	43.22	17.75	1.93	43.22	23.2	23.65	7.49	23.65	33.71	25.57	28	33.71
hsa-miR-299-5p	59.96	33.97	80.2	80.2	25.38	52.05	38.3	52.05	49.33	28.17	28	49.33
hsa-miR-34c-5p	2.3	22.26	3.59	22.26	23.2	13.43	21.99	23.2	11.27	29.04	28	29.04
hsa-miR-551b-3p	27.41	38.48	43.56	43.56	36.29	33.87	32.86	36.29	49.33	30.78	28	49.33
hsa-miR-217	24.62	33.97	21.91	33.97	28.65	29.33	23.8	29.33	31.76	36.85	28	36.85
hsa-miR-496	42.29	38.48	46.89	46.89	33.01	48.64	33.77	48.64	56.16	23.83	28.84	56.16
hsa-miR-517a-3p	31.13	26.76	1.67	31.13	28.65	14.56	33.77	33.77	38.59	29.91	28.84	38.59
hsa-miR-377-3p	37.64	17.75	1.67	37.64	17.74	11.15	17.46	17.74	17.13	31.64	28.84	31.64
hsa-miR-23a-3p	33.92	31.27	48.56	48.56	30.83	196.32	47.36	196.32	95.18	94.12	28.84	95.18
hsa-miR-3147	23.69	21.36	30.24	30.24	29.74	17.97	22.9	29.74	42.5	14.29	29.69	42.5
hsa-miR-526b-5p	19.97	7.84	23.58	23.58	17.74	24.79	21.08	24.79	31.76	26.44	29.69	31.76
hsa-miR-301a-5p	49.73	40.28	60.21	60.21	33.01	53.19	32.86	53.19	43.47	35.98	29.69	43.47
hsa-miR-877-5p	51.59	34.87	38.56	51.59	39.56	49.78	18.37	49.78	38.59	39.45	29.69	39.45
hsa-miR-183-5p	77.63	69.11	71.87	77.63	49.38	70.23	51.9	70.23	55.18	46.4	29.69	55.18
hsa-miR-25-5p	27.41	25.86	23.58	27.41	31.92	27.06	21.99	31.92	30.79	24.7	30.53	30.79
hsa-miR-1276	46.94	46.59	40.23	46.94	35.19	25.92	35.58	35.58	34.69	35.12	30.53	35.12
hsa-miR-215-5p	40.43	29.47	21.91	40.43	25.38	25.92	25.62	25.92	36.64	35.12	30.53	36.64
hsa-miR-450a-1-3p	41.36	49.29	41.89	49.29	26.47	22.51	34.68	34.68	27.86	30.78	31.38	31.38
hsa-miR-607	49.73	38.48	51.89	51.89	38.47	23.65	43.74	43.74	48.35	28.17	32.22	48.35
hsa-miR-1323	52.52	52.89	31.9	52.89	50.47	30.47	38.3	50.47	30.79	43.79	32.22	43.79
hsa-miR-25-3p	20.9	1	28.57	28.57	21.01	90.67	32.86	90.67	29.81	47.26	32.22	47.26
hsa-miR-1255a	51.59	45.69	43.56	51.59	35.19	42.96	46.46	46.46	41.52	22.97	33.07	41.52
hsa-miR-520c-3p	66.47	62.81	26.91	66.47	35.19	23.65	39.21	39.21	41.52	30.78	33.07	41.52
hsa-miR-107	42.29	43.88	35.23	43.88	40.65	47.51	30.15	47.51	53.23	40.32	33.07	53.23
hsa-miR-548h-5p	46.94	62.81	35.23	62.81	46.1	23.65	41.93	46.1	52.25	49.87	33.07	52.25
hsa-miR-5196-5p	30.2	40.28	48.56	48.56	38.47	31.6	24.71	38.47	50.3	29.91	33.92	50.3
hsa-miR-761	34.85	34.87	11.92	34.87	24.29	39.55	31.96	39.55	40.54	46.4	33.92	46.4
hsa-miR-584-3p	36.71	51.99	40.23	51.99	37.38	31.6	25.62	37.38	54.2	46.4	33.92	54.2
hsa-miR-514b-3p	70.19	85.33	43.56	85.33	62.47	53.19	46.46	62.47	52.25	51.6	33.92	52.25
hsa-miR-574-5p	21.83	15.05	36.9	36.9	24.29	25.92	28.33	28.33	59.08	68.96	33.92	68.96
hsa-miR-203a-3p	43.22	44.78	21.91	44.78	36.29	22.51	24.71	36.29	42.5	30.78	34.76	42.5
hsa-miR-561-3p	32.06	58.3	15.25	58.3	70.1	32.74	37.4	70.1	46.4	49	34.76	49
hsa-miR-1268a	32.99	45.69	25.24	45.69	37.38	27.06	37.4	37.4	24.93	26.44	35.61	35.61
hsa-miR-100-5p	40.43	42.98	15.25	42.98	40.65	39.55	41.93	41.93	36.64	53.34	35.61	53.34
hsa-miR-517b-3p	42.29	61	15.25	61	29.74	13.43	31.05	31.05	30.79	27.31	36.45	36.45
hsa-miR-4516	8.81	51.99	21.91	51.99	14.47	47.51	26.52	47.51	63.96	42.06	36.45	63.96
hsa-miR-525-5p	67.4	74.52	70.2	74.52	54.83	52.05	60.05	60.05	65.91	59.41	37.3	65.91
hsa-miR-223-3p	68.33	39.38	126.82	126.82	55.92	337.18	40.11	337.18	92.26	134.91	37.3	134.91
hsa-miR-515-3p	47.87	52.89	58.55	58.55	41.74	60	48.27	60	25.91	22.97	38.14	38.14
hsa-miR-128-1-5p	37.64	22.26	86.86	86.86	38.47	61.14	41.02	61.14	40.54	53.34	38.14	53.34
hsa-miR-23c	40.43	36.68	23.58	40.43	33.01	39.55	38.3	39.55	28.84	25.57	38.99	38.99
hsa-miR-613	68.33	70.91	61.88	70.91	42.83	40.69	42.83	42.83	42.5	26.44	38.99	42.5
hsa-miR-4488	11.6	6.04	21.91	21.91	3.56	1.14	16.55	16.55	23.96	38.59	38.99	38.99
hsa-miR-516b-5p	49.73	53.8	36.9	53.8	54.83	25.92	28.33	54.83	37.62	42.06	39.84	42.06
hsa-miR-508-3p	130.64	64.61	36.9	130.64	72.28	42.96	80.89	80.89	49.33	55.07	39.84	55.07
hsa-miR-197-3p	50.66	33.97	33.57	50.66	49.38	46.37	41.02	49.38	59.08	67.22	39.84	67.22
hsa-miR-302f	58.1	67.31	30.24	67.31	35.19	41.83	39.21	41.83	32.74	35.98	40.68	40.68
hsa-miR-106b-5p	63.68	40.28	38.56	63.68	54.83	94.08	28.33	94.08	54.2	49.87	40.68	54.2
hsa-miR-20a-5p+hsa-miR-20b-5p	38.57	43.88	23.58	43.88	30.83	127.03	40.11	127.03	52.25	68.09	40.68	68.09
hsa-miR-337-3p	62.75	64.61	68.54	68.54	52.65	40.69	45.55	52.65	56.16	45.53	41.53	56.16
hsa-miR-222-3p	59.96	35.77	28.57	59.96	38.47	63.41	59.14	63.41	64.94	55.94	41.53	64.94
hsa-miR-130a-3p	20.9	29.47	11.92	29.47	28.65	123.62	31.96	123.62	63.96	77.64	41.53	77.64
hsa-miR-4755-5p	40.43	50.19	48.56	50.19	33.01	38.42	47.36	47.36	38.59	35.98	42.37	42.37
hsa-miR-628-5p	59.96	79.02	43.56	79.02	54.83	54.32	57.33	57.33	38.59	39.45	42.37	42.37
hsa-miR-652-5p	50.66	60.1	30.24	60.1	50.47	38.42	50.99	50.99	45.42	62.02	42.37	62.02
hsa-miR-199a-5p	92.51	60.1	93.52	93.52	47.19	112.26	53.71	112.26	79.57	97.6	42.37	97.6
hsa-miR-1287-3p	47.87	51.09	55.22	55.22	38.47	28.19	40.11	40.11	30.79	40.32	43.22	43.22
hsa-miR-520d-5p+hsa-miR-527+hsa-miR-518a-5p	43.22	28.57	35.23	43.22	29.74	11.15	36.49	36.49	21.03	42.06	43.22	43.22
hsa-miR-191-5p	41.36	24.06	30.24	41.36	37.38	88.4	25.62	88.4	43.47	103.67	43.22	103.67
hsa-miR-552-3p	63.68	55.6	58.55	63.68	26.47	50.91	32.86	50.91	47.37	35.12	44.06	47.37
hsa-miR-212-3p	58.1	45.69	46.89	58.1	33.01	53.19	28.33	53.19	45.42	31.64	44.91	45.42
hsa-miR-649	55.31	69.11	40.23	69.11	58.1	46.37	41.02	58.1	50.3	35.12	44.91	50.3
hsa-miR-891b	47.87	62.81	56.88	62.81	41.74	45.23	41.93	45.23	59.08	55.07	44.91	59.08
hsa-miR-769-5p	61.82	51.99	35.23	61.82	43.92	42.96	41.02	43.92	58.11	55.94	44.91	58.11
hsa-miR-26a-5p	97.16	64.61	91.85	97.16	72.28	112.26	63.68	112.26	62.01	93.26	44.91	93.26
hsa-miR-942-5p	69.26	41.18	58.55	69.26	41.74	46.37	47.36	47.36	21.03	20.36	45.75	45.75
hsa-miR-1262	47.87	61.9	56.88	61.9	34.1	27.06	22.9	34.1	48.35	40.32	45.75	48.35
hsa-miR-610	55.31	61	88.52	88.52	65.74	62.27	67.3	67.3	49.33	55.94	48.29	55.94
hsa-miR-651-5p	58.1	70.01	20.25	70.01	62.47	45.23	45.55	62.47	45.42	49	49.14	49.14
hsa-miR-33b-5p	35.78	58.3	61.88	61.88	48.29	33.87	31.05	48.29	30.79	55.94	49.14	55.94
hsa-miR-544a	66.47	97.05	31.9	97.05	81.01	54.32	52.8	81.01	39.57	78.5	49.14	78.5
hsa-miR-93-5p	32.06	13.25	11.92	32.06	30.83	105.44	30.15	105.44	76.64	98.46	49.14	98.46
hsa-miR-29a-3p	76.7	42.98	38.56	76.7	81.01	58.87	57.33	81.01	45.42	56.81	51.67	56.81
hsa-miR-598-3p	59.96	68.21	36.9	68.21	43.92	57.73	73.64	73.64	83.47	82.84	51.67	83.47
hsa-miR-630	38.57	35.77	25.24	38.57	38.47	42.96	32.86	42.96	66.89	54.21	52.52	66.89
hsa-miR-219a-5p	68.33	66.41	48.56	68.33	62.47	58.87	57.33	62.47	57.13	65.49	53.36	65.49
hsa-miR-21-5p	45.08	31.27	25.24	45.08	46.1	202	35.58	202	83.47	95.86	53.36	95.86
hsa-miR-302c-3p	88.79	63.71	45.23	88.79	50.47	72.5	37.4	72.5	39.57	49.87	55.9	55.9
hsa-miR-1279	113.9	115.07	95.18	115.07	106.1	64.55	68.21	106.1	62.99	68.96	55.9	68.96
hsa-miR-510-3p	108.32	75.42	76.86	108.32	53.74	77.04	85.42	85.42	64.94	44.66	56.75	64.94
hsa-miR-3614-3p	71.12	80.83	65.21	80.83	58.1	44.1	50.08	58.1	46.4	47.26	56.75	56.75
hsa-miR-1252-5p	67.4	99.75	66.87	99.75	70.1	66.82	74.55	74.55	53.23	50.74	57.59	57.59
hsa-miR-1244	100.88	108.76	68.54	108.76	76.65	79.31	77.27	79.31	62.01	60.28	57.59	62.01
hsa-miR-575	71.12	66.41	66.87	71.12	51.56	46.37	44.65	51.56	54.2	52.47	60.97	60.97
hsa-miR-520b	89.72	102.45	30.24	102.45	88.65	55.46	50.08	88.65	55.18	55.94	60.97	60.97
hsa-miR-27b-3p	50.66	73.62	43.56	73.62	64.65	36.15	56.43	64.65	55.18	60.28	60.97	60.97
hsa-miR-374b-5p	95.3	82.63	41.89	95.3	60.28	66.82	64.58	66.82	49.33	57.68	61.82	61.82
hsa-miR-491-3p	59.96	67.31	53.55	67.31	67.92	45.23	70.93	70.93	78.6	68.09	64.36	78.6
hsa-miR-142-3p	53.45	56.5	60.21	60.21	53.74	199.73	42.83	199.73	62.99	52.47	65.2	65.2
hsa-miR-30a-5p	115.76	128.58	103.51	128.58	76.65	88.4	87.24	88.4	88.35	67.22	65.2	88.35
hsa-miR-7-5p	83.21	59.2	65.21	83.21	37.38	45.23	62.77	62.77	38.59	37.72	67.74	67.74
hsa-miR-148a-3p	66.47	90.74	88.52	90.74	77.74	83.86	50.08	83.86	63.96	68.96	67.74	68.96
hsa-miR-4521	71.12	63.71	55.22	71.12	58.1	47.51	38.3	58.1	52.25	48.13	69.43	69.43
hsa-miR-520a-3p	46.94	72.72	5.26	72.72	77.74	41.83	52.8	77.74	45.42	60.28	69.43	69.43
hsa-miR-95-3p	139.01	228.6	81.86	228.6	113.74	80.45	104.46	113.74	62.01	80.24	69.43	80.24
hsa-miR-28-3p	68.33	74.52	60.21	74.52	52.65	48.64	56.43	56.43	71.77	63.75	70.28	71.77
hsa-miR-1537-3p	122.27	91.64	93.52	122.27	72.28	73.63	77.27	77.27	48.35	67.22	70.28	70.28
hsa-miR-195-5p	143.66	140.3	88.52	143.66	96.28	104.31	101.74	104.31	64.94	100.2	73.66	100.2
hsa-miR-301b-3p	93.44	102.45	103.51	103.51	94.1	123.62	89.05	123.62	106.89	71.56	77.89	106.89
hsa-miR-3074-3p	84.14	151.11	121.83	151.11	95.19	103.17	74.55	103.17	100.06	81.98	77.89	100.06
hsa-miR-873-3p	55.31	97.95	3.59	97.95	82.1	99.76	106.27	106.27	124.45	115.82	77.89	124.45
hsa-miR-1305	109.25	120.47	116.83	120.47	97.37	134.98	91.77	134.98	129.33	101.93	81.27	129.33
hsa-miR-616-3p	97.16	106.96	80.2	106.96	100.65	58.87	79.08	100.65	79.57	86.31	82.11	86.31
hsa-miR-363-3p	81.35	95.24	51.89	95.24	86.47	90.67	89.96	90.67	75.67	70.69	84.65	84.65
hsa-miR-3136-5p	108.32	164.62	165.12	165.12	135.56	106.58	128.92	135.56	104.94	79.37	88.88	104.94
hsa-miR-1827	159.48	121.37	108.5	159.48	82.1	89.54	100.83	100.83	123.48	99.33	90.57	123.48
hsa-miR-495-3p	148.32	155.61	140.14	155.61	98.47	125.89	144.33	144.33	142.99	115.82	90.57	142.99
hsa-miR-206	81.35	64.61	90.19	90.19	83.19	58.87	69.11	83.19	51.28	61.15	91.42	91.42
hsa-miR-376a-2-5p	144.6	178.14	71.87	178.14	118.1	72.5	86.33	118.1	79.57	93.26	93.11	93.26
hsa-miR-1257	161.34	172.73	170.12	172.73	111.56	139.52	128.02	139.52	119.58	103.67	94.8	119.58
hsa-miR-516a-3p+hsa-miR-516b-3p	160.41	132.19	141.81	160.41	89.74	109.99	107.17	109.99	130.31	76.77	96.49	130.31
hsa-miR-514b-5p	138.08	145.7	135.15	145.7	122.46	107.71	145.23	145.23	109.82	101.93	97.33	109.82
hsa-miR-188-5p	143.66	124.08	115.17	143.66	155.19	142.93	123.49	155.19	126.41	102.8	97.33	126.41
hsa-miR-126-3p	125.06	15.95	115.17	125.06	133.37	464.41	62.77	464.41	84.45	203.46	97.33	203.46
hsa-miR-601	90.65	136.69	66.87	136.69	105.01	72.5	58.24	105.01	59.08	67.22	99.87	99.87
hsa-miR-548ak	101.81	86.23	75.2	101.81	63.56	70.23	69.11	70.23	82.5	62.88	104.1	104.1
hsa-miR-411-5p	99.95	102.45	123.49	123.49	87.56	120.21	104.46	120.21	89.33	103.67	106.64	106.64
hsa-miR-92a-3p	63.68	15.95	63.54	63.68	89.74	104.31	98.11	104.31	123.48	172.22	106.64	172.22
hsa-miR-3144-3p	99.02	61.9	31.9	99.02	107.19	103.17	79.08	107.19	95.18	90.65	110.86	110.86
hsa-miR-627-3p	125.06	106.96	91.85	125.06	120.28	80.45	99.02	120.28	116.65	109.74	110.86	116.65
hsa-miR-1185-2-3p	150.18	147.5	136.81	150.18	138.83	131.57	115.33	138.83	121.53	92.39	121.01	121.53
hsa-miR-548ar-3p	185.52	177.24	166.79	185.52	139.92	124.75	106.27	139.92	127.38	94.12	121.01	127.38
hsa-miR-1-5p	160.41	123.18	118.5	160.41	110.47	97.49	132.55	132.55	92.26	99.33	121.01	121.01
hsa-miR-302a-3p	129.71	189.85	115.17	189.85	171.55	127.03	132.55	171.55	96.16	121.89	121.86	121.89
hsa-miR-4443	92.51	143.9	1.93	143.9	108.28	102.03	121.67	121.67	140.07	115.82	123.55	140.07
hsa-miR-1285-5p	143.66	181.74	215.08	215.08	143.19	159.97	144.33	159.97	130.31	121.89	130.31	130.31
hsa-miR-499a-3p	176.22	191.66	125.16	191.66	159.55	130.43	137.08	159.55	139.09	137.51	137.08	139.09
hsa-miR-378f	139.01	166.43	106.84	166.43	144.28	161.11	157.92	161.11	152.75	145.32	139.61	152.75
hsa-miR-190a-5p	173.43	226.8	108.5	226.8	191.19	138.39	170.61	191.19	125.43	152.26	140.46	152.26
hsa-miR-518f-3p	151.11	173.63	180.11	180.11	150.83	155.43	124.39	155.43	142.99	108.01	143	143
hsa-miR-423-5p	58.1	65.51	88.52	88.52	100.65	212.22	166.08	212.22	391.8	344.04	145.53	391.8
hsa-miR-548j-5p	149.25	184.45	193.43	193.43	151.92	172.46	166.98	172.46	157.63	143.59	146.38	157.63
hsa-miR-196a-5p	170.64	188.05	211.75	211.75	170.46	172.46	141.61	172.46	152.75	138.38	149.76	152.75
hsa-miR-587	203.19	174.54	131.82	203.19	141.01	146.34	166.08	166.08	106.89	109.74	150.61	150.61
hsa-miR-597-5p	248.76	300.68	273.36	300.68	228.28	181.55	161.55	228.28	148.85	144.46	154.83	154.83
hsa-miR-548v	185.52	323.21	191.77	323.21	179.19	119.07	137.99	179.19	122.5	121.03	156.53	156.53
hsa-miR-519d-3p	127.85	144.8	113.5	144.8	151.92	115.67	126.2	151.92	106.89	151.4	159.06	159.06
hsa-miR-656-3p	335.25	239.41	265.04	335.25	198.83	212.22	176.95	212.22	166.41	140.98	161.6	166.41
hsa-miR-548i	238.53	217.79	185.11	238.53	193.37	139.52	195.08	195.08	143.97	160.94	164.14	164.14
hsa-miR-548d-3p	213.42	231.3	273.36	273.36	207.55	224.72	204.14	224.72	175.19	160.07	169.21	175.19
hsa-miR-376a-3p	151.11	166.43	141.81	166.43	147.56	147.47	161.55	161.55	147.87	162.68	170.9	170.9
hsa-miR-873-5p	195.75	206.97	266.7	266.7	142.1	216.77	193.26	216.77	180.07	151.4	171.75	180.07
hsa-miR-2117	191.1	209.68	190.1	209.68	178.1	158.83	143.42	178.1	163.48	154.87	171.75	171.75
hsa-miR-378h	288.75	300.68	364.95	364.95	205.37	242.9	202.33	242.9	214.22	200.86	173.44	214.22
hsa-miR-3144-5p	152.97	131.29	226.74	226.74	153.01	162.24	192.36	192.36	178.12	132.31	174.28	178.12
hsa-miR-483-3p	176.22	121.37	111.84	176.22	237.01	149.75	125.3	237.01	158.6	217.35	181.89	217.35
hsa-miR-585-3p	237.6	232.2	258.38	258.38	254.46	203.14	180.58	254.46	191.78	168.75	186.12	191.78
hsa-miR-320d	233.88	290.77	260.04	290.77	201.01	239.49	197.79	239.49	170.31	157.47	193.73	193.73
hsa-miR-141-3p	308.28	261.04	160.13	308.28	241.37	203.14	250.36	250.36	165.43	195.65	197.96	197.96
hsa-miR-155-5p	192.96	318.7	286.69	318.7	275.19	253.12	224.98	275.19	235.68	199.99	203.03	235.68
hsa-miR-1245b-5p	186.45	224.09	233.4	233.4	192.28	183.82	230.42	230.42	177.14	176.56	207.26	207.26
hsa-miR-454-3p	225.51	470.08	268.37	470.08	232.64	258.8	234.95	258.8	225.93	190.45	213.18	225.93
hsa-let-7c-5p	203.19	207.87	183.44	207.87	190.1	167.92	191.45	191.45	171.29	167.88	215.72	215.72
hsa-miR-548y	274.8	241.21	213.41	274.8	221.73	231.54	271.2	271.2	217.15	197.39	215.72	217.15
hsa-miR-4536-3p	97.16	152.91	176.78	176.78	166.1	152.02	146.14	166.1	156.65	178.3	221.64	221.64
hsa-miR-105-5p	246.9	219.59	260.04	260.04	218.46	224.72	221.36	224.72	206.41	185.24	221.64	221.64
hsa-miR-26b-5p	393.84	351.14	225.07	393.84	282.82	241.76	311.07	311.07	220.07	231.23	222.48	231.23
hsa-miR-302a-5p	280.38	270.05	248.38	280.38	209.74	200.86	218.64	218.64	192.75	170.49	225.86	225.86
hsa-miR-148b-3p	201.33	232.2	211.75	232.2	190.1	159.97	187.83	190.1	187.88	193.92	230.09	230.09
hsa-miR-302d-3p	419.88	179.04	175.11	419.88	163.92	401.93	346.41	401.93	345.94	431.69	236.86	431.69
hsa-miR-219b-3p	218.07	284.46	228.4	284.46	228.28	195.18	189.64	228.28	223	196.52	238.55	238.55
hsa-miR-448	241.32	261.94	205.09	261.94	291.55	170.19	242.2	291.55	207.39	212.14	239.39	239.39
hsa-miR-32-5p	418.02	425.03	311.66	425.03	306.82	286.06	298.38	306.82	207.39	215.61	246.16	246.16
hsa-miR-487a-3p	178.08	197.96	151.8	197.96	231.55	149.75	232.23	232.23	213.24	196.52	248.69	248.69
hsa-miR-612	344.55	269.15	331.65	344.55	276.28	329.23	245.82	329.23	298.13	283.3	261.38	298.13
hsa-miR-548a-3p	173.43	259.23	228.4	259.23	241.37	196.32	264.85	264.85	219.1	241.65	267.3	267.3
hsa-miR-379-5p	302.7	374.57	414.91	414.91	333	341.73	273.01	341.73	276.66	226.03	270.68	276.66
hsa-miR-499b-3p	144.6	277.26	153.47	277.26	247.92	166.78	201.42	247.92	226.9	259.87	274.91	274.91
hsa-miR-577	459.87	587.22	245.05	587.22	447.55	330.37	324.66	447.55	301.06	302.39	276.6	302.39
hsa-miR-450b-5p	285.03	230.4	236.73	285.03	264.28	189.5	268.48	268.48	209.34	199.99	281.67	281.67
hsa-miR-302b-3p	591.94	633.17	434.89	633.17	540.27	443.97	440.66	540.27	449.36	455.99	329.02	455.99
hsa-miR-570-3p	377.1	340.33	346.63	377.1	327.55	378.08	368.16	378.08	264.96	215.61	337.48	337.48
hsa-miR-320e	229.23	286.27	344.97	344.97	227.19	405.34	260.32	405.34	654.26	448.18	343.4	654.26
hsa-miR-216b-5p	315.72	317.8	308.33	317.8	357	317.87	348.23	357	316.67	353.59	349.32	353.59
hsa-miR-16-5p	222.72	146.6	318.33	318.33	314.46	495.09	237.67	495.09	191.78	365.74	349.32	365.74
hsa-miR-549a	647.74	432.24	631.39	647.74	468.27	557.57	493.22	557.57	352.77	367.47	359.47	367.47
hsa-miR-520h	505.44	568.29	571.44	571.44	445.36	376.94	370.88	445.36	349.84	323.22	367.92	367.92
hsa-miR-888-5p	896.06	571	558.12	896.06	520.63	555.29	581.12	581.12	443.51	418.67	371.3	443.51
hsa-miR-199a-3p+hsa-miR-199b-3p	379.89	380.88	295.01	380.88	390.82	341.73	360.01	390.82	346.92	392.64	380.61	392.64
hsa-miR-520e	320.37	461.97	260.04	461.97	447.55	303.1	314.7	447.55	369.36	366.6	433.03	433.03
hsa-miR-367-3p	718.42	567.39	519.82	718.42	687.54	580.28	678.09	687.54	480.59	532.35	454.17	532.35
hsa-miR-548q	560.32	589.02	844.54	844.54	461.73	618.91	608.31	618.91	537.18	481.15	497.3	537.18
hsa-miR-2116-5p	775.15	829.6	762.95	829.6	576.27	595.05	645.46	645.46	523.52	457.72	498.99	523.52
hsa-miR-3161	759.34	1280.12	989.42	1280.12	771.54	693.88	591.09	771.54	660.12	530.61	506.6	660.12
hsa-miR-208a-3p	206.91	367.36	228.4	367.36	338.46	206.54	302.01	338.46	314.72	385.7	513.36	513.36
hsa-miR-561-5p	325.95	476.39	498.17	498.17	469.36	430.33	433.41	469.36	439.61	445.57	528.58	528.58
hsa-miR-374a-5p	533.35	511.53	275.03	533.35	534.82	401.93	526.75	534.82	406.43	580.08	540.42	580.08
hsa-let-7b-5p	562.18	599.83	731.31	731.31	555.54	740.46	554.84	740.46	606.45	711.11	553.95	711.11
hsa-miR-590-5p	863.5	743.1	762.95	863.5	732.26	747.28	727.93	747.28	578.16	587.02	608.07	608.07
hsa-miR-186-5p	992.78	902.58	684.68	992.78	734.45	637.08	721.58	734.45	598.65	604.37	616.52	616.52
hsa-miR-1246	1456.86	1041.34	942.79	1456.86	882.81	857.47	942.7	942.7	661.09	595.7	623.29	661.09
hsa-miR-944	944.42	849.42	722.98	944.42	720.27	617.77	746.05	746.05	551.81	549.7	672.33	672.33
hsa-miR-4455	482.19	641.28	859.53	859.53	652.63	665.48	721.58	721.58	664.02	680.74	675.71	680.74
hsa-miR-4531	939.77	1003.5	1067.68	1067.68	896.99	909.72	920.95	920.95	775.25	794.42	741.67	794.42
hsa-miR-579-3p	398.49	119.57	1199.24	1199.24	523.91	2218.38	1763.73	2218.38	704.02	447.31	785.64	785.64
hsa-miR-451a	1099.73	243.02	1988.56	1988.56	1259.16	11510.8	766.89	11510.8	905.02	2406.74	821.15	2406.74
hsa-miR-548ai+hsa-miR-570-5p	419.88	562.89	619.73	619.73	602.45	613.23	755.11	755.11	637.68	707.64	831.3	831.3
hsa-miR-30e-5p	1689.37	1283.73	1262.52	1689.37	1060.62	1138.06	1345.06	1345.06	895.26	875.99	917.55	917.55
hsa-miR-548ah-5p	773.29	930.52	816.23	930.52	927.53	789.31	947.23	947.23	889.41	975.78	922.62	975.78
hsa-let-7i-5p	900.71	446.65	1210.9	1210.9	932.99	982.42	775.96	982.42	825.99	844.75	989.43	989.43
hsa-miR-548g-3p	1167.62	1037.74	999.41	1167.62	1150.07	979.02	1156.57	1156.57	949.9	1124.17	1097.66	1124.17
hsa-miR-548z+hsa-miR-548h-3p	856.99	1220.65	914.48	1220.65	1267.89	913.13	1094.04	1267.89	1101.14	1389.71	1214.35	1389.71
hsa-miR-1253	2503.14	1827.06	2013.54	2503.14	1443.52	1980.96	1995.72	1995.72	1333.35	1224.83	1327.66	1333.35
hsa-miR-4536-5p	1151.81	1498.18	1487.33	1498.18	1448.97	1193.72	1304.28	1448.97	1323.6	1315.08	1496.78	1496.78
hsa-miR-4454+hsa-miR-7975	586.36	1053.06	1503.98	1503.98	1195.89	2871.57	2024.71	2871.57	3159.87	2806.78	1530.6	3159.87
hsa-miR-1297	2388.75	2564.12	1480.66	2564.12	2329.31	1574.27	1745.6	2329.31	1638.75	1866.98	1654.9	1866.98
hsa-miR-548aa+hsa-miR-548t-3p	1841.89	2486.63	2210.04	2486.63	1867.87	1866.22	1867.03	1867.87	1814.38	1788.02	1661.66	1814.38
hsa-miR-522-3p	1318.29	1775.7	1129.3	1775.7	1642.06	1026.73	1360.46	1642.06	1336.28	1549.38	1701.41	1701.41
hsa-miR-519b-5p+hsa-miR-519c-5p+hsa-miR-523-5p+hsa-miR-518e-5p+hsa-miR-522-5p+hsa-miR-519a-5p	1228.07	1424.29	1407.39	1424.29	1459.88	1236.89	1501.83	1501.83	1420.19	1627.48	1709.86	1709.86
hsa-miR-520d-3p	2358.99	1736.95	3528.91	3528.91	2131.86	3052.2	3160.2	3160.2	2256.37	2177.65	2557.98	2557.98
hsa-miR-644a	4450.61	3658.89	3382.37	4450.61	3391.82	3397.54	3695.77	3695.77	2694.46	2947.36	3102.54	3102.54
hsa-miR-548a-5p	968.6	1495.47	1495.65	1495.65	1796.96	1478.85	1882.44	1882.44	1951.95	2004.96	3207.39	3207.39
hsa-miR-1290	5372.27	4716.73	3207.52	5372.27	4123.8	3510	4193.27	4193.27	3313.06	3484.51	3527.87	3527.87
hsa-miR-548ar-5p	2468.73	3168.72	2419.86	3168.72	3574	2610.3	3538.99	3574	3003.76	3557.41	3587.06	3587.06
hsa-miR-603	1663.33	2421.75	3483.95	3483.95	2919.47	2689.82	3007.95	3007.95	3099.38	3176.45	4582.31	4582.31
hsa-miR-548j-3p	3897.25	5600.65	3462.3	5600.65	5605.21	3330.51	4406.23	5605.21	4329.75	5246.09	5049.92	5246.09
hsa-miR-548n	3511.29	4366.22	5144.2	5144.2	4589.6	4463.09	4910.09	4910.09	4706.37	4768.82	6031.64	6031.64
hsa-miR-627-5p	5409.47	7953.29	6557.99	7953.29	8506.94	6135.27	7850.74	8506.94	7971.08	8618.26	10374.5	10374.5

## Sheet: Sheet1
Notice. HC: Healthy control, OV; Opisthorchis viverrini, CCA: Cholagniocarcinoma, R: Replicate
