# Supplementary material for: Differential circulating miRNA profiles identified miR-423-5p, miR-93-5p, and miR-4532 as potential biomarkers for cholangiocarcinoma diagnosis
Source: PeerJ. 2024 Dec 10;12:e18367. doi: 10.7717/peerj.18367 (PMC11639864; doi:10.7717/peerj.18367)
Supplement: Supplemental Information 5 [file peerj-12-18367-s005.xlsx]

## Sheet: Everage spike control
	miR-432-5p				miR-93-5p				miR-4532				Spike-in Iso 1				Spike-in Iso 2				Everage spike control	miR-432-5p Delta Ct				2^-DettaCt			miR-93-5p Delta Ct				2^-DettaCt			miR-4532 Delta Ct				2^-DettaCt
Replicate	1	2	3	mean	1	2	3	mean	1	2	3	mean	1	2	3	mean	1	2	3	mean		1	2	3	Mean	miR-432-5p	Mean	SD	1	2	3	Mean	miR-93-5p	Mean	SD	1	2	3	Men	miR-4532	Mean	SD
A51	25.274	25.2542	25.2944	25.2742	30.0503	29.1194	29.5747	29.5815	32.4185	31.4307	31.3149	31.7214	21.1693	20.5369	20.4445	20.7169	25.7628	25.5077	25.6329	25.6345	23.1757	2.09828	2.07857	2.1187	2.09852	0.233498	0.186075	0.267049	6.87463	5.94368	6.39902	6.40578	0.0117942	0.008325	0.00789924	9.24278	8.25505	8.13919	8.54568	0.00267606	0.00453969	0.0032845
A52	24.2272	24.2204	24.147	24.1982	26.7691	26.8538	27.0123	26.8784	30.4443	30.2213	30.5349	30.4002	18.6986	18.5322	18.576	18.6022	24.1079	23.9409	23.9089	23.9859	21.2941	2.93315	2.92636	2.8529	2.90414	0.133588			5.47497	5.55977	5.7182	5.58431	0.0208427			9.15018	8.92722	9.24082	9.10607	0.00181467
A53	26.3133	26.2591	26.2987	26.2903	30.6209	30.4367	30.3774	30.4784	32.5987	32.4728	32.6833	32.5849	21.318	21.4704	21.6661	21.4848	26.5574	26.8723	26.6824	26.7041	24.0945	2.21886	2.16462	2.20421	2.19589	0.218258			6.52649	6.34227	6.28298	6.38392	0.0119743			8.50428	8.37835	8.58885	8.49049	0.0027804
A54	26.8533	27.1712	26.8086	26.9444	31.1467	30.9045	30.4047	30.8186	32.1341	32.4346	32.0979	32.2222	21.0698	20.6621	20.8043	20.8454	26.0471	25.9071	26.1416	26.0319	23.4387	3.41466	3.73252	3.36998	3.50572	0.0880386			7.708	7.46579	6.966	7.37993	0.0060037			8.69545	8.99596	8.65926	8.78356	0.00226927
A55	25.0684	24.8309	25.3136	25.071	29.0768	29.3055	29.1937	29.192	28.9586	28.7285	29.0464	28.9112	18.637	18.6971	19.6181	18.9841	24.1697	24.2032	24.287	24.22	21.602	3.46637	3.22888	3.71161	3.46895	0.0903111			7.47478	7.70349	7.59167	7.58998	0.00519025			7.35658	7.12645	7.44438	7.30913	0.00630568
A56	23.8478	23.6288	23.4335	23.6367	28.787	28.74	29.0538	28.8603	30.7911	31.1121	31.1715	31.0249	21.2565	21.1349	21.1184	21.1699	26.4993	26.7752	26.6538	26.6428	23.9063	-0.0585096	-0.277508	-0.472862	-0.269627	1.2055			4.8807	4.8337	5.1475	4.95396	0.0322633			6.88478	7.2058	7.26519	7.11859	0.00719601
A57	26.7267	26.5945	26.2369	26.5193	31.201	31.1151	31.1991	31.1717	31.7869	32.2662	31.633	31.8954	21.029	21.0095	21.1007	21.0464	25.7339	25.8652	25.6844	25.7612	23.4038	3.32287	3.19068	2.83306	3.11554	0.11538			7.7972	7.7113	7.79528	7.76793	0.00458797			8.38312	8.8624	8.22917	8.49156	0.00277834
A58	27.7149	28.1116	27.6607	27.8291	33.2188	31.0613	31.6837	31.9879	32.7253	33.4401	33.9655	33.377	22.3454	22.3872	22.0948	22.2758	27.7295	27.6266	27.565	27.6403	24.9581	2.75685	3.15355	2.70258	2.87099	0.136693			8.26072	6.10322	6.72562	7.02985	0.0076525			7.76722	8.48206	9.00737	8.41888	0.00292189
A59	26.7348	27.0646	27.3198	27.0397	32.851	32.7207	32.1298	32.5671	31.9641	31.9464	31.6803	31.8636	21.4835	21.3805	21.6483	21.5041	26.1105	26.3011	26.286	26.2326	23.8683	2.86651	3.19624	3.45144	3.1714	0.110998			8.98264	8.85237	8.26141	8.69881	0.00240656			8.09573	8.0781	7.81201	7.99528	0.00391905
A60	26.0889	25.6014	25.4685	25.7196	30.465	29.99	30.2825	30.2458	30.3452	30.3676	30.0586	30.2571	20.3254	20.114	20.0712	20.1702	25.764	25.5289	25.5737	25.6222	22.8962	3.19273	2.70522	2.57235	2.82343	0.141274			7.56878	7.09385	7.38633	7.34965	0.00613104			7.44905	7.47139	7.16236	7.36093	0.00608329
A71	28.2377	28.1139	28.0586	28.1367	34.0562	33.4003	33.5364	33.6643	32.0259	32.8732	32.0287	32.3093	22.0206	22.0574	22.1958	22.0912	27.4251	27.4187	27.5013	27.4484	24.7698	3.46787	3.34405	3.28881	3.36691	0.0969302			9.28634	8.63048	8.76662	8.89448	0.00210133			7.25607	8.10342	7.25887	7.53945	0.00537525
A72	27.51	27.5517	27.5512	27.5376	35.0329	33.4939	33.4394	33.9887	32.13	31.3086	31.5851	31.6746	21.1978	21.4537	21.4689	21.3735	26.3255	26.3998	26.2748	26.3334	23.8534	3.65657	3.69832	3.69774	3.68421	0.0777933			11.1795	9.64047	9.586	10.1353	0.000889136			8.27661	7.45513	7.73168	7.82114	0.00442183
A73	27.5663	27.6214	27.6013	27.5963	32.1635	32.0694	32.021	32.0847	31.5994	31.3089	31.6149	31.5077	20.7236	20.4499	20.5122	20.5619	25.8382	25.7219	25.9429	25.8343	23.1981	4.36814	4.42326	4.40314	4.39818	0.0474259			8.96539	8.87128	8.82291	8.88653	0.00211295			8.40126	8.1108	8.4168	8.30962	0.00315178
A83	29.3078	29.1636	29.1532	29.2082	35.4898	33.0622	34.4911	34.3477	32.2013	32.275	32.1053	32.1939	23.8049	23.6546	23.384	23.6145	28.9319	28.8151	28.4832	28.7434	26.1789	3.12886	2.98469	2.97421	3.02925	0.122491			9.31085	6.88327	8.31216	8.16876	0.00347503			6.02238	6.0961	5.92637	6.01495	0.0154639
A93	26.2402	26.085	26.0663	26.1305	30.3224	30.1958	30.1681	30.2288	30.6118	31.3084	31.1379	31.0194	21.185	21.2623	21.1894	21.2122	26.0035	25.8743	25.5017	25.7932	23.5027	2.73744	2.58232	2.56354	2.62777	0.161794			6.81971	6.69306	6.66539	6.72605	0.00944619			7.1091	7.80573	7.63516	7.51667	0.00546082
A95	25.3044	25.0009	24.3535	24.8863	28.1947	28.4977	28.2775	28.3233	30.0268	29.9738	29.8908	29.9638	19.29	19.1463	19.1471	19.1944	24.1498	24.1817	24.1723	24.1679	21.6812	3.62324	3.31973	2.67234	3.2051	0.108435			6.5135	6.81655	6.59633	6.64213	0.010012			8.34565	8.29266	8.20961	8.28264	0.00321127
A98	26.3746	26.5405	26.5632	26.4928	30.3173	30.8864	30.3094	30.5044	32.308	32.2487	32.3173	32.2913	20.2085	20.4565	20.5989	20.4213	25.1648	25.0136	25.0773	25.0852	22.7533	3.62134	3.78722	3.80994	3.7395	0.0748684			7.56403	8.1331	7.55611	7.75108	0.00464186			9.55469	9.49538	9.56406	9.53805	0.00134512
B51	24.0289	23.6185	24.0276	23.8917	31.2362	31.2924	31.8737	31.4674	28.3588	27.2315	28.0561	27.8821	18.3905	17.4823	18.362	18.0783	23.9654	24.0937	23.8215	23.9602	21.0192	3.00972	2.59929	3.00838	2.87246	0.136553	0.12537	0.100136	10.217	10.2732	10.8544	10.4482	0.000715781	0.00391083	0.00384858	7.33953	6.21231	7.03683	6.86289	0.0085914	0.00504562	0.00354317
B52	25.2381	25.2571	25.1729	25.2227	32.2924	32.5515	32.1707	32.3382	29.3271	29.2192	29.077	29.2078	19.2241	19.138	19.1362	19.1661	24.569	24.4067	24.4467	24.4741	21.8201	3.41797	3.437	3.35279	3.40259	0.0945626			10.4723	10.7313	10.3506	10.5181	0.000681942			7.50697	7.39908	7.25685	7.38763	0.00597174
B53	24.8596	24.7397	24.6096	24.7363	30.5683	30.7026	30.5581	30.6097	27.8811	28.0197	28.1872	28.0293	19.2542	19.2271	19.1984	19.2266	24.5662	24.6286	24.5315	24.5754	21.901	2.95864	2.83867	2.70858	2.8353	0.140117			8.66725	8.80157	8.65712	8.70865	0.00239021			5.98005	6.11871	6.28617	6.12831	0.0142954
B57	25.6131	26.075	26.0047	25.8976	29.7362	29.1961	29.4612	29.4645	31.1069	30.6956	30.6369	30.8131	20.8823	20.6452	20.6957	20.741	25.3923	25.4701	25.7309	25.5311	23.1361	2.47699	2.93889	2.86867	2.76152	0.147469			6.60011	6.06003	6.32511	6.32842	0.0124439			7.97084	7.55952	7.50084	7.67706	0.00488622
B58	25.4905	25.2172	25.103	25.2702	31.253	30.9042	31.4514	31.2029	30.3322	30.2251	30.3846	30.314	21.0943	20.9428	20.9781	21.0051	26.382	26.2041	26.3901	26.3254	23.6653	1.82525	1.5519	1.43777	1.60497	0.328742			7.58771	7.23891	7.78616	7.5376	0.00538217			6.66695	6.55979	6.71934	6.64869	0.00996652
B59	26.1595	25.6961	25.7615	25.8724	31.6319	31.8162	33.4086	32.2855	30.3409	30.1029	30.3534	30.2657	20.3408	20.591	20.5784	20.5034	25.9812	26.0663	25.8973	25.9816	23.2425	2.91703	2.45365	2.51901	2.6299	0.161555			8.38939	8.5737	10.1661	9.04306	0.0018957			7.09841	6.86043	7.11088	7.02324	0.00768767
B60	26.7813	26.8957	26.756	26.811	30.4047	30.636	30.1854	30.4087	31.5994	31.597	32.182	31.7928	21.2142	21.0594	21.1898	21.1545	26.2837	26.3172	26.2432	26.2814	23.7179	3.06336	3.17778	3.03807	3.09307	0.117191			6.68682	6.91806	6.46743	6.69077	0.00968004			7.88152	7.87911	8.46408	8.0749	0.00370862
B62	25.482	25.5955	25.6509	25.5761	30.5728	30.7834	30.6619	30.6727	29.7066	29.8633	29.9418	29.8372	19.1323	19.1726	19.3568	19.2205	24.5993	24.5133	24.8249	24.6458	21.9332	3.54882	3.66235	3.71769	3.64295	0.0800502			8.63958	8.85026	8.7287	8.73952	0.00233961			7.77343	7.93011	8.00865	7.90406	0.00417484
B72	25.711	25.5422	25.4956	25.5829	31.8887	31.301	31.3547	31.5148	29.7486	29.8236	29.7019	29.758	19.255	18.8622	19.168	19.0951	24.3121	24.249	24.312	24.291	21.6931	4.01798	3.84914	3.80256	3.88989	0.0674568			10.1956	9.60799	9.66161	9.82174	0.001105			8.05554	8.13056	8.00881	8.06497	0.00373424
B84	26.8463	26.1936	26.2298	26.4232	30.7151	30.695	31.0503	30.8202	32.3582	32.3444	32.5035	32.402	21.3355	21.1683	21.3361	21.28	27.1032	27.0043	27.0205	27.0427	24.1613	2.68499	2.03229	2.06851	2.26193	0.208493			6.55383	6.53373	6.88895	6.65884	0.00989671			8.19687	8.18308	8.34219	8.24071	0.00330597
B87	26.2824	26.3337	26.1886	26.2683	32.0091	32.1854	32.3594	32.1846	32.1734	31.9227	32.7044	32.2668	20.0697	20.0713	20.07	20.0703	25.3688	25.157	25.0726	25.1995	22.6349	3.64753	3.69885	3.55372	3.63337	0.0805838			9.37417	9.55051	9.72451	9.54973	0.00133428			9.53849	9.28778	10.0695	9.63191	0.00126039
B90	26.0597	26.2641	26.3552	26.2263	33.4299	33.8086	35.0552	34.0979	32.3906	33.2857	32.5851	32.7538	20.8456	20.6962	20.8792	20.807	26.2074	26.1787	26.1412	26.1758	23.4914	2.56829	2.77272	2.86386	2.73496	0.150209			9.93847	10.3172	11.5638	10.6065	0.000641394			8.89924	9.79428	9.09367	9.2624	0.00162832
B93	25.8423	25.9504	25.604	25.7989	30.5509	30.881	30.9244	30.7855	29.6875	29.5367	29.6867	29.637	19.6901	19.5325	19.5031	19.5752	24.3631	24.3561	24.3517	24.357	21.9661	3.87624	3.98431	3.63787	3.83281	0.0701793			8.58482	8.91496	8.95833	8.81937	0.00221363			7.72141	7.57061	7.72058	7.67086	0.00490727
B96	28.2566	27.9822	27.8684	28.0357	32.8565	33.1617	32.8632	32.9605	33.3692	33.4863	33.3925	33.416	21.9409	21.8395	21.7666	21.849	26.5032	26.3737	26.3192	26.3987	24.1238	4.1328	3.85832	3.74459	3.9119	0.0664355			8.7327	9.03781	8.73932	8.83661	0.00218733			9.24535	9.36249	9.2687	9.29218	0.00159505
B98	25.7856	25.9318	25.8232	25.8469	30.9737	30.5892	30.7129	30.7586	30.4231	30.3097	30.5509	30.4279	19.3992	19.4733	19.3591	19.4105	24.1362	24.2243	24.2398	24.2001	21.8053	3.9803	4.12646	4.01792	4.04156	0.0607254			9.16845	8.78391	8.90761	8.95332	0.00201735			8.61776	8.5044	8.74559	8.62259	0.00253713
B100	27.4043	27.57	27.4121	27.4621	30.8916	31.1072	31.3189	31.1059	33.2233	32.4044	32.5656	32.7311	21.4459	21.7775	21.6325	21.6187	26.3247	26.9523	26.3184	26.5318	24.0752	3.32909	3.49479	3.33687	3.38691	0.0955955			6.8164	7.03195	7.24367	7.03067	0.00764816			9.14807	8.32921	8.49035	8.65588	0.00247926
C53	26.4182	26.1469	26.0665	26.2106	32.0641	32.0127	32.5028	32.1932	29.2482	29.2555	29.6633	29.389	22.3281	22.1947	22.247	22.2566	27.7807	27.7563	27.7222	27.7531	25.0049	1.41338	1.14207	1.06164	1.2057	0.433559	0.680425	0.963969	7.05927	7.00788	7.49795	7.18837	0.00685624	0.0157847	0.0215009	4.24338	4.25067	4.65842	4.38416	0.0478892	0.0204369	0.0219202
C54	25.9698	25.6819	25.9021	25.8513	32.2919	32.2648	31.9384	32.165	30.8227	30.3884	30.4766	30.5626	21.8724	22.1282	22.0283	22.0096	27.1308	27.1284	26.9729	27.0774	24.5435	1.42634	1.13842	1.35863	1.3078	0.403937			7.74838	7.72128	7.39492	7.62153	0.00507799			6.27917	5.8449	5.93307	6.01905	0.0154201
C57	29.7524	29.5296	29.6606	29.6476	34.8883	39.0304	34.2968	36.0718	31.7266	31.3124	31.503	31.514	22.3224	22.3638	22.4389	22.375	27.3994	27.7681	27.281	27.4828	24.9289	4.8235	4.60067	4.73171	4.71862	0.0379798			9.95935	14.1014	9.36783	11.1429	0.000442244			6.79763	6.38344	6.57404	6.58504	0.0104161
C58	28.1985	28.2279	28.2363	28.2209	34.0167	NaN	33.1259	33.5713	30.7494	31.29	31.8085	31.2826	22.1775	22.2498	22.5116	22.313	27.3315	27.2308	27.4197	27.3273	24.8201	3.37835	3.40774	3.41616	3.40075	0.0946829			9.1966		8.30572	8.75116	0.0023208			5.92921	6.46988	6.98836	6.46248	0.0113396
C60	26.0637	25.9043	25.793	25.9203	32.7951	34.4327	33.1463	33.458	32.7019	31.9571	32.2667	32.3085	22.9767	22.691	22.68	22.7826	27.6116	27.4724	27.4834	27.5225	25.1525	0.911185	0.751816	0.640466	0.767822	0.587303			7.64254	9.28017	7.99375	8.30549	0.00316082			7.54935	6.80454	7.11416	7.15602	0.00701171
C62	27.8667	27.3229	27.4282	27.5393	35.2724	34.4738	34.4059	34.7174	33.1193	32.3017	31.9766	32.4659	22.8678	22.7668	22.6791	22.7712	28.9003	28.6275	28.4801	28.6693	25.7203	2.1464	1.60262	1.70797	1.81899	0.283418			9.55214	8.75351	8.68566	8.9971	0.00195705			7.39907	6.58141	6.25632	6.7456	0.00931906
C65	27.3758	27.6024	27.4317	27.4699	34.5204	33.5042	33.7515	33.9254	31.334	31.5051	31.4147	31.4179	22.3348	22.3379	22.3076	22.3268	27.353	27.4044	27.4233	27.3936	24.8602	2.51559	2.74221	2.57147	2.60976	0.163826			9.66024	8.64403	8.89136	9.06521	0.00186681			6.47378	6.64489	6.55457	6.55774	0.0106151
C67	23.5458	23.4432	23.6618	23.5502	29.1819	29.3459	29.2023	29.2434	30.4452	30.6528	30.6395	30.5792	23.4389	23.539	23.6195	23.5325	28.5068	28.6715	28.4551	28.5445	26.0385	-2.49273	-2.59532	-2.37667	-2.48824	5.61093			3.1434	3.30741	3.16386	3.20489	0.108451			4.40671	4.6143	4.60099	4.54067	0.0429658
C69	29.9147	29.2619	29.1301	29.4356	33.3651	34.4605	33.3049	33.7102	32.3799	34.3156	33.2873	33.3276	24.7232	24.525	24.5123	24.5868	29.7702	30.3517	30.0262	30.0494	27.3181	2.59659	1.94385	1.81205	2.1175	0.230447			6.04699	7.14239	5.98682	6.39207	0.0119068			5.06182	6.99748	5.96916	6.00949	0.0155226
C70	23.0907	23.1807	23.2177	23.163	29.381	29.2963	29.1963	29.2912	29.7373	29.8164	29.9607	29.8381	21.1616	21.1993	21.1374	21.1661	26.069	26.2485	26.1027	26.1401	23.6531	-0.562387	-0.472391	-0.435399	-0.490059	1.4045			5.72796	5.64319	5.5432	5.63812	0.0200797			6.0842	6.16335	6.30761	6.18505	0.013744
C71	23.2995	23.4087	23.1663	23.2915	30.2202	30.4171	30.6858	30.441	30.3649	30.46	30.3423	30.3891	21.3037	21.6176	21.356	21.4257	26.1373	26.1239	26.1192	26.1268	23.7763	-0.476792	-0.367567	-0.609964	-0.484774	1.39937			6.44391	6.64085	6.90948	6.66475	0.00985622			6.58866	6.68368	6.566	6.61278	0.0102177
C74	25.8723	25.5941	25.9401	25.8021	31.3438	30.8688	31.6444	31.2857	32.4803	32.8101	32.5479	32.6128	22.7022	22.8332	22.8648	22.8001	27.9825	27.8161	27.9419	27.9135	25.3568	0.515475	0.237281	0.583329	0.445362	0.7344			5.987	5.51198	6.28765	5.92888	0.0164146			7.12349	7.45327	7.19116	7.25597	0.00654236
C75	23.6248	23.3466	23.3131	23.4282	29.0647	29.0937	28.9772	29.0452	29.2014	29.206	28.8532	29.0869	21.4997	21.2588	21.2456	21.3347	26.0558	26.1724	26.0923	26.1068	23.7208	-0.0959337	-0.374143	-0.407695	-0.292591	1.22484			5.34395	5.37291	5.25639	5.32442	0.0249569			5.48064	5.48527	5.13239	5.3661	0.0242462
C76	26.8554	27.0009	26.9196	26.9253	34.2824	NaN	35.7928	35.0376	29.3778	29.3179	29.4727	29.3895	21.4503	21.661	21.3998	21.5037	26.68	26.8029	26.8033	26.7621	24.1329	2.72244	2.86796	2.78665	2.79235	0.144351			10.1495		11.6599	10.9047	0.000521626			5.2449	5.18498	5.33977	5.25655	0.026159
C79	25.3014	25.3234	25.1482	25.2577	30.799	31.1057	30.7808	30.8952	28.4331	27.6756	28.6771	28.2619	19.89	19.9833	19.9643	19.9459	25.0974	24.9463	25.0623	25.0353	22.4906	2.81076	2.83282	2.6576	2.76706	0.146903			8.30843	8.61509	8.29018	8.40457	0.00295103			5.94244	5.18497	6.18649	5.7713	0.018309
C80	23.6069	23.686	23.6785	23.6571	30.3786	30.3835	30.3018	30.3546	29.1388	29.1947	29.2156	29.183	21.6813	21.4353	21.5447	21.5538	26.6006	26.355	26.5222	26.4926	24.0232	-0.416245	-0.337197	-0.344687	-0.366043	1.28881			6.35543	6.36029	6.27862	6.33145	0.0124178			5.11564	5.17151	5.19244	5.15986	0.0279722
C81	24.736	24.4591	24.5612	24.5854	29.7617	29.7018	29.6099	29.6911	30.3593	30.7322	30.6583	30.5833	21.6221	21.4249	21.3598	21.4689	26.7177	26.5712	26.5568	26.6152	24.0421	0.693883	0.41701	0.519094	0.543329	0.686186			5.71963	5.65975	5.56784	5.64907	0.0199278			6.31723	6.69008	6.61624	6.54118	0.0107376
C82	22.3523	22.4001	22.3587	22.3704	28.0643	28.1303	27.9629	28.0525	25.9066	25.7396	25.7878	25.8114	18.5509	18.4974	18.3847	18.4777	23.752	24.0459	23.6314	23.8098	21.1437	1.20863	1.2564	1.21499	1.22667	0.427302			6.92056	6.98658	6.81919	6.90878	0.00832245			4.76288	4.59593	4.6441	4.66763	0.0393461
C83	25.5414	25.5701	25.475	25.5289	30.7261	31.1033	30.6963	30.8419	30.822	30.712	31.0793	30.8711	22.0337	22.1589	21.9534	22.0486	27.0449	27.095	27.2779	27.1392	24.5939	0.947488	0.9762	0.881101	0.93493	0.523068			6.13211	6.50933	6.10231	6.24792	0.013158			6.22807	6.11804	6.48535	6.27715	0.012894
C84	28.0727	28.0566	28.9718	28.367	32.1619	32.6492	32.1251	32.3121	33.5922	32.9297	32.2104	32.9108	23.1112	23.1325	23.2036	23.1491	28.5731	28.4233	28.5744	28.5236	25.8363	2.23637	2.22025	3.13548	2.5307	0.173055			6.32553	6.8129	6.2888	6.47575	0.0112359			7.75588	7.09335	6.37407	7.07444	0.00741964
C85	28.8372	29.1	28.8421	28.9264	36.467	34.4708	36.0813	35.673	33.4402	35.3089	35.8259	34.8583	24.0147	23.845	24.1382	23.9993	28.9226	28.852	28.8866	28.8871	26.4432	2.39404	2.65679	2.39892	2.48325	0.178841			10.0238	8.02757	9.63814	9.22982	0.00166551			6.997	8.86571	9.38268	8.41513	0.0029295
C86	26.4305	26.3504	26.3368	26.3726	32.3963	32.5642	32.5593	32.5066	30.298	30.1892	30.3326	30.2733	23.0436	23.0144	23.0154	23.0245	28.2095	28.3735	28.2501	28.2777	25.6511	0.779449	0.69935	0.685722	0.721507	0.606463			6.74526	6.91307	6.90822	6.85552	0.00863542			4.64691	4.53809	4.68151	4.62217	0.0406058
C87	24.0634	24.7385	24.6153	24.4724	29.5509	30.1791	30.3769	30.0356	30.029	30.6276	30.3426	30.3331	21.8387	22.1942	22.0842	22.039	26.9925	27.1231	27.043	27.0529	24.546	-0.482551	0.192554	0.0693031	-0.0735646	1.05231			5.00492	5.63315	5.83097	5.48968	0.0222557			5.48308	6.08165	5.79667	5.78713	0.0181092
C88	27.8786	27.8633	28.0717	27.9379	33.4529	32.1222	33.7683	33.1144	32.6451	32.3192	32.5775	32.5139	22.0039	22.0458	22.3075	22.1191	27.2167	27.2175	27.324	27.2527	24.6859	3.19274	3.17737	3.38578	3.25197	0.104969			8.76697	7.43628	9.08242	8.42856	0.00290236			7.95917	7.63333	7.89159	7.82803	0.00440076
C89	27.3086	26.668	26.8033	26.9266	31.3821	31.4264	31.649	31.4858	31.1128	31.3197	31.3316	31.2547	21.4018	21.283	21.4666	21.3838	26.4994	26.2791	26.3324	26.3703	23.8771	3.43152	2.79098	2.92623	3.04958	0.120778			7.50506	7.54935	7.77195	7.60878	0.00512304			7.23575	7.44264	7.45454	7.37764	0.00601324
C90	29.0109	28.9601	28.8469	28.9393	30.314	30.4235	30.3106	30.3494	31.0876	30.6719	31.1504	30.9699	18.6848	18.473	18.4547	18.5375	24.1638	24.0132	24.0338	24.0703	21.3039	7.70705	7.65616	7.54301	7.63541	0.00502936			9.01009	9.11962	9.00672	9.04548	0.00189252			9.78369	9.36799	9.84648	9.66605	0.00123092
C91	27.2589	27.3763	27.0444	27.2265	31.0094	31.5362	31.3971	31.3142	30.6761	30.7097	30.984	30.7899	21.5012	21.6691	21.5237	21.5647	26.4254	26.4023	27.0557	26.6278	24.0962	3.16271	3.28009	2.94816	3.13032	0.114203			6.91313	7.43994	7.30086	7.21798	0.00671696			6.57984	6.61344	6.8878	6.69369	0.00966046
C92	28.2288	28.0682	26.0737	27.4569	31.3523	32.0349	31.9051	31.7641	32.0068	33.4143	32.5402	32.6538	22.3726	22.2229	22.3753	22.3236	27.6766	27.5249	27.5862	27.5959	24.9597	3.26901	3.10841	1.11396	2.49713	0.177129			6.39259	7.07515	6.94538	6.80437	0.00894704			7.04709	8.4546	7.58044	7.69404	0.00482906
C93	24.2136	24.0177	23.9119	24.0477	29.3438	28.9983	28.8048	29.049	29.753	29.4085	29.3757	29.5124	20.7815	20.7557	20.7371	20.7581	26.5655	26.7965	26.5866	26.6495	23.7038	0.509832	0.313866	0.208085	0.343928	0.787893			5.64002	5.29448	5.10101	5.34517	0.0246005			6.04918	5.7047	5.6719	5.80859	0.0178418
C94	23.5322	23.611	23.7652	23.6361	27.5861	27.3897	27.5029	27.4929	28.7879	29.0162	29.1601	28.9881	20.8067	20.8623	21.0219	20.897	26.3668	26.4268	26.2924	26.362	23.6295	-0.0972967	-0.0184548	0.135689	0.00664578	0.995404			3.95663	3.76021	3.87346	3.86343	0.0687054			5.15842	5.38672	5.53066	5.3586	0.0243726
C95	25.9303	26.2031	26.1462	26.0932	31.4218	31.3197	32.1497	31.6304	31.1588	31.7642	31.5993	31.5074	22.1508	22.5203	22.5401	22.4037	27.8106	28.1975	27.8161	27.9414	25.1726	0.757742	1.03051	0.973639	0.920631	0.528278			6.24925	6.14712	6.97716	6.45784	0.0113761			5.98627	6.59159	6.42668	6.33485	0.0123886
C96	25.3495	25.2871	25.6325	25.423	30.5203	30.1158	30.5141	30.3834	30.188	30.2985	30.8274	30.438	21.0816	21.0734	21.1771	21.1107	26.508	26.3562	26.5208	26.4617	23.7862	1.56327	1.50094	1.84629	1.63683	0.321562			6.73414	6.32956	6.72791	6.5972	0.0103286			6.40185	6.51231	7.04116	6.65177	0.00994526
C97	24.2828	24.1575	24.2482	24.2295	27.2777	27.12	27.2649	27.2209	28.2587	28.1821	28.0535	28.1647	20.1982	20.094	20.2689	20.187	25.7292	25.7504	25.8114	25.7637	22.9753	1.3075	1.18212	1.27284	1.25415	0.41924			4.30234	4.14462	4.28956	4.24551	0.05272			5.28333	5.20674	5.07811	5.18939	0.0274054
C98	23.9088	24.2317	24.2549	24.1318	29.3053	29.0227	29.2657	29.1979	28.2988	28.6101	28.5423	28.4837	20.6523	20.9908	21.1211	20.9214	26.8368	27.2229	27.0601	27.0399	23.9806	-0.0718364	0.251094	0.274247	0.151168	0.900521			5.32464	5.04204	5.28507	5.21725	0.0268814			4.31818	4.62942	4.56168	4.50309	0.0440995
C99	23.598	24.0406	23.8814	23.84	30.1215	30.2973	30.2943	30.2377	27.3042	27.4902	27.547	27.4471	21.2742	21.6	21.4796	21.4513	27.2797	27.449	27.4869	27.4052	24.4282	-0.830183	-0.387588	-0.546844	-0.588205	1.50337			5.6933	5.86905	5.86605	5.80947	0.017831			2.87596	3.06196	3.11876	3.01889	0.123374
NTC	33.1002	32.2787	32.6335	32.6708	34.3972	36.0268	34.1167	34.8469	35.1457	34.5418	33.3558	34.3478	NaN	35.0328	NaN	35.0328	NaN	35.0906	36.4752	35.7829
	Spike-in mean	spike-in normalization factor	spike-in corrected 432-5p	spike-in corrected 93-5p	spike-in corrected 4532
A51	23.1757	-0.608994	25.8832	30.1904	32.3303						Healthy
A52	21.2941	-2.49059	26.6888	29.369	32.8907						OV
A53	24.0945	0.309784	25.9806	30.1686	32.2752						CCA
A54	23.4387	-0.346007	27.2904	31.1646	32.5682
A55	21.602	-2.18264	27.2536	31.3746	31.0938
A56	23.9063	0.12167	23.515	28.7386	30.9033
A57	23.4038	-0.380878	26.9002	31.5526	32.2762
A58	24.9581	1.17341	26.6557	30.8145	32.2036
A59	23.8683	0.0836687	26.9561	32.4835	31.78
A60	22.8962	-0.888477	26.6081	31.1343	31.1456
A71	24.7698	0.985141	27.1516	32.6792	31.3241
A72	23.8534	0.0687594	27.4689	33.92	31.6058
A73	23.1981	-0.586545	28.1828	32.6712	32.0943
A83	26.1789	2.39428	26.8139	31.9534	29.7996
A93	23.5027	-0.281959	26.4124	30.5107	31.3013
A95	21.6812	-2.10348	26.9898	30.4268	32.0673
A98	22.7533	-1.03139	27.5242	31.5358	33.3227
B51	21.0192	-2.76544	26.6571	34.2329	30.6476
B52	21.8201	-1.96455	27.1873	34.3027	31.1723
B53	21.901	-1.88366	26.62	32.4933	29.913
B57	23.1361	-0.648598	26.5462	30.1131	31.4617
B58	23.6653	-0.11941	25.3896	31.3223	30.4334
B59	23.2425	-0.542189	26.4146	32.8277	30.8079
B60	23.7179	-0.0667521	26.8777	30.4754	31.8596
B62	21.9332	-1.85149	27.4276	32.5242	31.6887
B72	21.6931	-2.09161	27.6746	33.6064	31.8496
B84	24.1613	0.376647	26.0466	30.4435	32.0254
B87	22.6349	-1.14977	27.418	33.3344	33.4166
B90	23.4914	-0.293281	26.5196	34.3912	33.0471
B93	21.9661	-1.81858	27.6175	32.604	31.4555
B96	24.1238	0.339176	27.6966	32.6213	33.0768
B98	21.8053	-1.97938	27.8262	32.738	32.4073
B100	24.0752	0.29056	27.1716	30.8153	32.4405
C53	25.0049	1.22018	24.9904	30.973	28.1688
C54	24.5435	0.758836	25.0925	31.4062	29.8037
C57	24.9289	1.14427	28.5033	34.9275	30.3697
C58	24.8201	1.03548	27.1854	32.5358	30.2472
C60	25.1525	1.36785	24.5525	32.0902	30.9407
C62	25.7203	1.9356	25.6037	32.7818	30.5303
C65	24.8602	1.07551	26.3944	32.8499	30.3424
C67	26.0385	2.25382	21.2964	26.9896	28.3253
C69	27.3181	3.53342	25.9022	30.1767	29.7942
C70	23.6531	-0.131599	23.2946	29.4228	29.9697
C71	23.7763	-0.00838448	23.2999	30.4494	30.3974
C74	25.3568	1.57211	24.23	29.7135	31.0406
C75	23.7208	-0.0638975	23.4921	29.1091	29.1508
C76	24.1329	0.348253	26.577	34.6894	29.0412
C79	22.4906	-1.29406	26.5517	32.1892	29.556
C80	24.0232	0.238514	23.4186	30.1161	28.9445
C81	24.0421	0.257408	24.328	29.4337	30.3259
C82	21.1437	-2.64095	25.0113	30.6934	28.4523
C83	24.5939	0.809273	24.7196	30.0326	30.0618
C84	25.8363	2.05167	26.3154	30.2604	30.8591
C85	26.4432	2.65853	26.2679	33.0145	32.1998
C86	25.6511	1.86641	24.5062	30.6402	28.4068
C87	24.546	0.761283	23.7111	29.2744	29.5718
C88	24.6859	0.901218	27.0366	32.2132	31.6127
C89	23.8771	0.0923928	26.8342	31.3935	31.1623
C90	21.3039	-2.48078	31.4201	32.8301	33.4507
C91	24.0962	0.311552	26.915	31.0026	30.4784
C92	24.9597	1.17508	26.2818	30.589	31.4787
C93	23.7038	-0.0808587	24.1286	29.1298	29.5933
C94	23.6295	-0.155182	23.7913	27.6481	29.1433
C95	25.1726	1.38791	24.7053	30.2425	30.1195
C96	23.7862	0.00152678	25.4215	30.3819	30.4364
C97	22.9753	-0.809322	25.0388	28.0302	28.9741
C98	23.9806	0.195977	23.9358	29.0019	28.2878
C99	24.4282	0.643558	23.1965	29.5941	26.8036
NTC	35.4079	11.6232	21.0476	23.2237	22.7246
	23.7847
			spike-in corrected mir-432-5p	spike-in corrected mir-93-5p	spike-in corrected mir-4532
		Normal	26.7221	31.2169	31.8225
		Flukeworm	26.9432	32.4279	31.7314
		CCA	25.2557	30.7379	29.944
		stdev A	0.998265	1.29782	0.843749
		stdev B	0.679864	1.41673	0.997994
		stdev C	1.83555	1.80472	1.28553
		fold change between A over B	1.16562	2.31486	0.938848
		fold change between B over C	0.310472	0.309936	0.28969
		fold change between A over C	0.361893	0.71746	0.271975
		p value for fold change between A over B	0.460971	0.0158498	0.779823
		p value for fold change between B over C	1.77414e-05	0.000896768	4.04841e-06
		p value for fold change between A over C	0.000501881	0.280615	1.11409e-07

## Sheet: Stat 93
																Descriptives
																MIR93NoOutlier
																	N	Mean	Std. Deviation	Std. Error	95% Confidence Interval for Mean		Minimum	Maximum
																					Lower Bound	Upper Bound
																Healthy	17	0.00138518	0.00119999	0.000291041	0.000768197	0.00200216	0.000159	0.004841
																OV	16	0.000660875	0.000671015	0.000167754	0.000303317	0.00101843	9.3e-05	0.002366
																CCA	33	0.00180082	0.00161552	0.000281226	0.00122798	0.00237366	7.5e-05	0.007631
																Total	66	0.00141741	0.00139965	0.000172285	0.00107333	0.00176149	7.5e-05	0.007631
																Test of Homogeneity of Variances
																		Levene Statistic	df1	df2	Sig.
																MIR93NoOutlier	Based on Mean	2.97406	2	63	0.0583137
																	Based on Median	2.69778	2	63	0.0751359
																	Based on Median and with adjusted df	2.69778	2	53.7877	0.0764675
																	Based on trimmed mean	2.69514	2	63	0.075319
																ANOVA
																MIR93NoOutlier
																	Sum of Squares	df	Mean Square	F	Sig.
																Between Groups	1.40262e-05	2	7.01312e-06	3.89925	0.0253202
																Within Groups	0.000113311	63	1.79858e-06
																Total	0.000127337	65
	Case Processing Summary															Multiple Comparisons
	Group		Cases													Dependent Variable:	MIR93NoOutlier
			Valid		Missing		Total									Tukey HSD
			N	Percent	N	Percent	N	Percent								(I) Group		Mean Difference (I-J)	Std. Error	Sig.	95% Confidence Interval
	MIR93NoOutlier	Healthy	17	1	0	0	17	1													Lower Bound	Upper Bound
		OV	16	1	0	0	16	1								Healthy	OV	0.000724301	0.00046713	0.274679	-0.000396962	0.00184556
		CCA	33	0.942857	2	0.0571429	35	1									CCA	-0.000415642	0.000400376	0.55582	-0.00137668	0.000545392
																OV	Healthy	-0.000724301	0.00046713	0.274679	-0.00184556	0.000396962
																	CCA	-.001139943*	0.000408551	0.0188236	-0.0021206	-0.000159288
																CCA	Healthy	0.000415642	0.000400376	0.55582	-0.000545392	0.00137668
																	OV	.001139943*	0.000408551	0.0188236	0.000159288	0.0021206
																*. The mean difference is significant at the 0.05 level.
																MIR93NoOutlier
																Tukey HSDa,b
																Group	N	Subset for alpha = 0.05
																		1	2
																OV	16	0.000660875
																Healthy	17	0.00138518	0.00138518
																CCA	33		0.00180082
																Sig.		0.213682	0.59539
																Means for groups in homogeneous subsets are displayed.
																a. Uses Harmonic Mean Sample Size = 19.785.
																b. The group sizes are unequal. The harmonic mean of the group sizes is used. Type I error levels are not guaranteed.

## Sheet: Stat 4532
																Descriptives
																MIR4532NoOutlier
																	N	Mean	Std. Deviation	Std. Error	95% Confidence Interval for Mean		Minimum	Maximum
																					Lower Bound	Upper Bound
																Healthy	16	0.000655	0.000280857	7.02144e-05	0.000505342	0.000804658	0.000267	0.001116
																OV	16	0.00081	0.000532619	0.000133155	0.000526187	0.00109381	0.000213	0.002239
																CCA	34	0.00279994	0.00197525	0.000338753	0.00211074	0.00348914	0.000181	0.007564
																Total	66	0.00179755	0.00177524	0.000218517	0.00136114	0.00223395	0.000181	0.007564
																Test of Homogeneity of Variances
																		Levene Statistic	df1	df2	Sig.
																MIR4532NoOutlier	Based on Mean	18.7816	2	63	4.00313e-07
																	Based on Median	9.51481	2	63	0.000244991
																	Based on Median and with adjusted df	9.51481	2	35.6245	0.000488835
																	Based on trimmed mean	16.3014	2	63	1.96974e-06
	Case Processing Summary															Robust Tests of Equality of Means
	Group		Cases													MIR4532NoOutlier
			Valid		Missing		Total										Statistica	df1	df2	Sig.
			N	Percent	N	Percent	N	Percent								Welch	18.9692	2	36.1062	2.33894e-06
	MIR4532NoOutlier	Healthy	16	0.941176	1	0.0588235	17	1								a. Asymptotically F distributed.
		OV	16	1	0	0	16	1
		CCA	34	0.971429	1	0.0285714	35	1
																Multiple Comparisons
																Dependent Variable:	MIR4532NoOutlier
																Dunnett C
																(I) Group		Mean Difference (I-J)	Std. Error	95% Confidence Interval
																				Lower Bound	Upper Bound
																Healthy	OV	-0.000155	0.000150533	-0.000546005	0.000236005
																	CCA	-.002144941*	0.000345953	-0.00299589	-0.001294
																OV	Healthy	0.000155	0.000150533	-0.000236005	0.000546005
																	CCA	-.001989941*	0.000363983	-0.00289008	-0.0010898
																CCA	Healthy	.002144941*	0.000345953	0.001294	0.00299589
																	OV	.001989941*	0.000363983	0.0010898	0.00289008
																*. The mean difference is significant at the 0.05 level.
														z

## Sheet: Stat 1294
																Descriptives
																MIR1294NoOutlier
																	N	Mean	Std. Deviation	Std. Error	95% Confidence Interval for Mean		Minimum	Maximum
																					Lower Bound	Upper Bound
																Healthy	16	1.63125e-05	1.92067e-05	4.80167e-06	6.07799e-06	2.6547e-05	2e-06	7.6e-05
																OV	14	4.85714e-06	3.91952e-06	1.04754e-06	2.59408e-06	7.12021e-06	1e-06	1.5e-05
																CCA	31	0.000179774	0.000237409	4.264e-05	9.26917e-05	0.000266857	1e-06	0.000881
																Total	61	9.67541e-05	0.000188505	2.41356e-05	4.84756e-05	0.000145033	1e-06	0.000881
																Test of Homogeneity of Variances
																		Levene Statistic	df1	df2	Sig.
																MIR1294NoOutlier	Based on Mean	11.9472	2	58	4.51885e-05
																	Based on Median	6.03063	2	58	0.00417401
																	Based on Median and with adjusted df	6.03063	2	30.2008	0.006257
																	Based on trimmed mean	9.92845	2	58	0.000195793
	Extreme Values																Robust Tests of Equality of Means
	Group				Case Number	Value											MIR1294NoOutlier
	MIR1294	Healthy	Highest	1	14	9.1e-05												Statistica	df1	df2	Sig.
				2	15	7.6e-05											Welch	10.8208	2	28.3063	0.000323111
				3	17	4.6e-05											a. Asymptotically F distributed.
				4	11	2.2e-05
				5	16	2.1e-05											Multiple Comparisons
			Lowest	1	5	2e-06											Dependent Variable:	MIR1294NoOutlier
				2	2	3e-06											Dunnett C
				3	3	4e-06											(I) Group		Mean Difference (I-J)	Std. Error	95% Confidence Interval
				4	4	5e-06															Lower Bound	Upper Bound
				5	7	6e-06											Healthy	OV	1.14554e-05	4.9146e-06	-1.31977e-06	2.42305e-05
		OV	Highest	1	33	3e-05												CCA	-.000163462*	4.29095e-05	-0.000269316	-5.76071e-05
				2	31	1.5e-05											OV	Healthy	-1.14554e-05	4.9146e-06	-2.42305e-05	1.31977e-06
				3	24	8e-06												CCA	-.000174917*	4.26529e-05	-0.000280072	-6.97617e-05
				4	20	7e-06											CCA	Healthy	.000163462*	4.29095e-05	5.76071e-05	0.000269316
				5	21	.000007a												OV	.000174917*	4.26529e-05	6.97617e-05	0.000280072
			Lowest	1	28	1e-06											*. The mean difference is significant at the 0.05 level.
				2	26	1e-06
				3	25	1e-06
				4	18	1e-06
				5	19	2e-06
		CCA	Highest	1	34	0.003215
				2	60	0.002483
				3	57	0.001466
				4	38	0.000881
				5	55	0.00081
			Lowest	1	59	1e-06
				2	62	4e-06
				3	68	6e-06
				4	64	6e-06
				5	49	7e-06
	a. Only a partial list of cases with the value .000007 are shown in the table of upper extremes.
